# Supplementary material for: Organocatalytic regio- and enantioselective C1-arylation of β,γ-alkynyl-α-imino esters with pyrrolo[2,1-a]isoquinolines
Source: Royal Society of Chemistry journal article supplement (doi:10.1039/d3cc04946a), 2023-12-15
Supplement: d3cc04946a1.pdf [file d3cc04946a1.pdf]

## Content

|                                                                                                   |    |
|---------------------------------------------------------------------------------------------------|----|
| 1. General information .....                                                                      | 2  |
| 2. General procedure for the preparation of $\beta,\gamma$ -alkynyl- $\alpha$ -imino esters ..... | 2  |
| 3. General procedure for the pyrrolo[2,1-a]isoquinolines .....                                    | 6  |
| 5. General procedure for the asymmetric synthesis of axially chiral allenes .....                 | 8  |
| 6. Scale-up synthesis of the product <b>3a</b> .....                                              | 8  |
| 7. Procedure for the late-stage functionalizations of <b>3a</b> .....                             | 9  |
| 9. Analytical data .....                                                                          | 9  |
| 10. X-ray crystallographic analysis .....                                                         | 17 |
| 11. Copies of NMR spectra and HPLC measurements of the products .....                             | 19 |
| 12. Reference .....                                                                               | 75 |

## 1. General information

The products were purified by column chromatography on silica gel (200-300 mesh). For thin-layer chromatography (TLC) analysis, silica gel plates (HSGF254) were used. Visualization of the developed TLC plates was performed with ultraviolet irradiation (254 nm) or staining potassium permanganate solution followed by heating using a heat gun. High resolution mass spectra on a Bruker Apex IV RTMS spectrometer.  $^1\text{H}$  and  $^{13}\text{C}$  NMR spectra were recorded on Bruker AVANCE-400 (400 MHz) and Bruker AVANCE-500 (500 MHz) spectrometer. Chemical shifts were reported in parts per million (ppm), and the residual solvent peak was used as an internal reference: proton (chloroform  $\delta$  7.26, acetone- $d_6$   $\delta$  2.05) and carbon (chloroform  $\delta$  77.16, acetone- $d_6$   $\delta$  29.84) was used as a reference. Multiplicity was indicated as follows: s (singlet), d (doublet), t (triplet), q (quartet), m (multiplet), dd (doublet of doublet), bs (broad singlet). Coupling constants were reported in Hertz (Hz). Melting points were determined on a SGW X-4 melting apparatus. Analytical HPLC was performed on a Agilent 1200 Series instrument using Daicel Chiralcel® columns as noted. Optical rotation values were measured on a Schmidt Haensch polarimeter.

## 2. General procedure for the preparation of $\beta,\gamma$ -alkynyl- $\alpha$ -imino esters

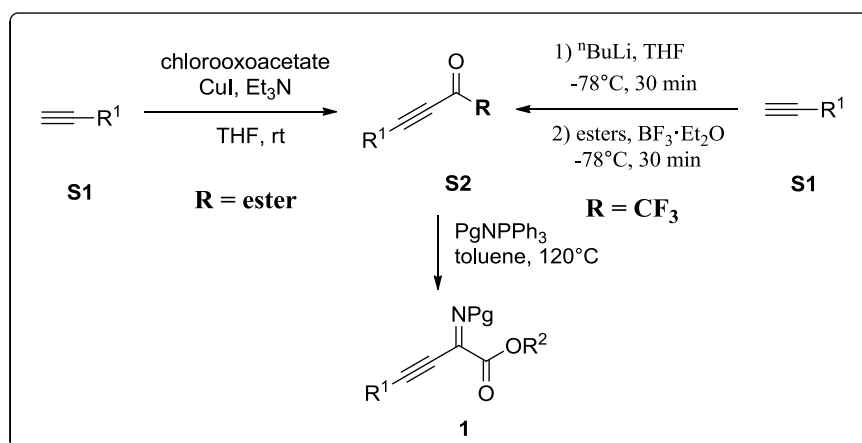

The alkynyl ketoesters ( $\text{R} = \text{ester}$ ) were synthesized according to the literature.<sup>1</sup> A two necked round bottomed flask was charged with CuI (0.0571 g, 10 mol%) and THF (7.5 mL, 0.4 M), triethylamine (0.5 mL, 1.2 equiv), alkyne (0.33 mL, 3.0 mmol, 1.0 equiv) and chlorooxoacetate (0.7 mL, 1.5 equiv) were added sequentially and the resulting mixture was stirred at room temperature for 24 hours. The reaction was quenched by saturated  $\text{NaHCO}_3$  aqueous solution and the aqueous phase was extracted with ethyl acetate. The organic phases were combined, dried over  $\text{Na}_2\text{SO}_4$  and concentrated under vacuum. The crude product was purified by silica gel chromatography (petroleum ether/ethyl acetate 95:5) to give the alkynyl ketoester **S2**.

When R group was  $\text{CF}_3$ , the alkynyl ketoester was prepared according to the literature.<sup>2</sup> A solution of phenylacetylene (0.33 mL, 3.0 mmol, 1.0 equiv) in anhydrous THF (0.3 M) was cooled to  $-78^\circ\text{C}$ , then  $^n\text{BuLi}$  (1.3 mL, 3.0 mmol, 2.4 M) in n-Hexane was slowly added within 15 min. The obtained reaction mixture was stirred at  $-78^\circ\text{C}$  for 0.5 h, and a solution of ethyl 2,2,2-trifluoroacetate (0.3 mL, 3 mmol) and  $\text{BF}_3 \cdot \text{OEt}_2$  (0.74 mL, 6 mmol) in THF (2 mL) was slowly added at  $-78^\circ\text{C}$  within 0.5 h. The mixture was allowed to keep at this temperature and stirred for 2 h. After quenching with 1 N hydrochloric acid, the aqueous layer was separated and extracted with  $\text{Et}_2\text{O}$  (10 mL  $\times$  3). The combined organic layer was washed with brine, dried with anhydrous  $\text{Na}_2\text{SO}_4$  and concentrated in vacuum. The residue was chromatographed on silica gel column (petroleum ether/ethyl acetate 99:1) to

obtain the desired products.

An oven-dried round bottom two-neck flask was added ketoester **S2** (1.0 mmol, 1.0 equiv), *N*-Boc-triphenyliminophosphorane (452.9 mg, 1.2 equiv) or *N*-Cbz-triphenyliminophosphorane (493.7 mg, 1.2 equiv) and toluene (0.1 M). The mixture was heated to 120 °C and stirred for 24-72 h. After cooling to room temperature, the mixture was concentrated under vacuum. The residue was purified by silica gel chromatography (petroleum ether/ethyl acetate 10:1-6:1) to give the  $\beta,\gamma$ -alkynyl- $\alpha$ -imino esters **1**.

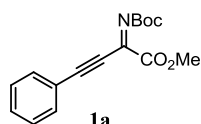

According to the general procedure, **1a** was obtained in 54% yield as a yellow solid, Melting point 55-58 °C. <sup>1</sup>H NMR (400 MHz, Chloroform-*d*)  $\delta$  7.54 (dt, *J* = 7.2, 1.4 Hz, 2H), 7.49 – 7.43 (m, 1H), 7.38 (dd, *J* = 8.2, 6.7 Hz, 2H), 3.95 (s, 3H), 1.57 (s, 9H). <sup>13</sup>C NMR (101 MHz, Chloroform-*d*)  $\delta$  161.8, 159.9, 144.6, 133.0, 131.2, 128.8, 120.0, 101.5, 84.4, 81.0, 54.0, 28.2. HRMS (ESI-TOF) *m/z*: [M+H]<sup>+</sup>Calcd for C<sub>16</sub>H<sub>18</sub>NO<sub>4</sub><sup>+</sup> 288.1231; Found:288.1227.

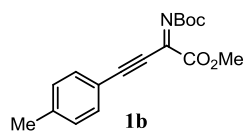

According to the general procedure, **1b** was obtained in 64% yield as a yellow solid, Melting point 43-45 °C. <sup>1</sup>H NMR (400 MHz, Chloroform-*d*)  $\delta$  7.44 (d, *J* = 7.9 Hz, 2H), 7.19 (d, *J* = 7.9 Hz, 2H), 3.95 (s, 3H), 2.38 (s, 3H), 1.57 (s, 9H). <sup>13</sup>C NMR (101 MHz, Chloroform-*d*)  $\delta$  161.7, 159.8, 144.5, 141.8, 132.8, 129.5, 116.7, 102.1, 84.1, 80.7, 53.8, 28.1, 21.8. HRMS (ESI-TOF) *m/z*: [M+H]<sup>+</sup>Calcd for C<sub>17</sub>H<sub>20</sub>NO<sub>4</sub><sup>+</sup> 302.1387; Found:302.1390.

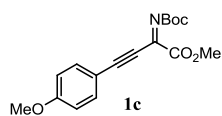

According to the general procedure, **1c** was obtained in 32% yield as a yellow solid, Melting point 41-43 °C. <sup>1</sup>H NMR (400 MHz, Chloroform-*d*)  $\delta$  7.54 – 7.47 (m, 2H), 6.92 – 6.86 (m, 2H), 3.95 (s, 3H), 3.84 (s, 3H), 1.58 (s, 9H). <sup>13</sup>C NMR (101 MHz, Chloroform-*d*)  $\delta$  161.9, 160.0, 159.7, 144.5, 134.9, 114.4, 111.7, 102.6, 84.0, 80.9, 55.4, 53.8, 28.1. HRMS (ESI-TOF) *m/z*: [M+H]<sup>+</sup>Calcd for C<sub>17</sub>H<sub>20</sub>NO<sub>5</sub><sup>+</sup> 318.1336; Found:318.1341.

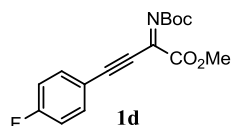

According to the general procedure, **1d** was obtained in 60% yield as a yellow solid, Melting point 37-40 °C. <sup>1</sup>H NMR (400 MHz, Chloroform-*d*)  $\delta$  7.55 (dd, *J* = 8.3, 5.4 Hz, 2H), 7.09 (t, *J* = 8.5 Hz, 2H), 3.96 (s, 3H), 1.57 (s, 9H). <sup>13</sup>C NMR (101 MHz, Chloroform-*d*)  $\delta$  165.4, 162.8, 160.6 (d, *J* = 186.6 Hz), 144.3, 136.3 (d, *J* = 9.2 Hz), 135.1 (d, *J* = 9.0 Hz), 116.3 (d, *J* = 22.5 Hz), 100.3, 84.2, 80.8, 53.8, 28.1. <sup>19</sup>F NMR (376 MHz, Chloroform-*d*)  $\delta$  -105.47. HRMS (ESI-TOF) *m/z*: [M+H]<sup>+</sup>Calcd for C<sub>16</sub>H<sub>17</sub>FNO<sub>4</sub><sup>+</sup> 306.1136; Found: 306.1137.

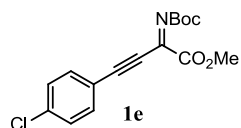

According to the general procedure, **1e** was obtained in 22% yield as a yellow solid, Melting point 44-47 °C. <sup>1</sup>H NMR (400 MHz, Chloroform-*d*)  $\delta$  7.55 (dd, *J* = 8.3, 5.4 Hz, 2H), 7.09 (t, *J* = 8.5 Hz, 2H), 3.96 (s, 3H), 1.57 (s, 9H). <sup>13</sup>C NMR (101 MHz, Chloroform-*d*)  $\delta$  161.5, 159.7, 144.2, 137.5, 134.0, 129.2, 118.2, 99.9, 84.3, 81.5, 53.9, 28.1. HRMS (ESI-TOF) *m/z*: [M+H]<sup>+</sup>Calcd for C<sub>16</sub>H<sub>17</sub>ClNO<sub>4</sub><sup>+</sup> : 322.0841; Found: 322.0841.

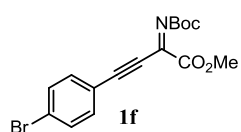

According to the general procedure, **1f** was obtained in 36% yield as a yellow solid. Melting point 50-53 °C. <sup>1</sup>H NMR (400 MHz, Chloroform-*d*)  $\delta$  7.54 (d, *J* = 8.5 Hz, 2H), 7.40 (d, *J* = 8.5 Hz, 2H), 3.96 (s, 3H), 1.57 (s, 9H). <sup>13</sup>C NMR (101 MHz, Chloroform-*d*)  $\delta$  161.5, 159.6, 144.2, 134.1, 132.1, 125.9, 118.7, 100.0, 84.3, 81.6, 53.9, 28.1. HRMS (ESI-TOF) *m/z*: [M+H]<sup>+</sup>Calcd for C<sub>16</sub>H<sub>17</sub>BrNO<sub>4</sub><sup>+</sup> : 366.0336;

Found: 366.0332.

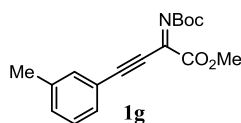

According to the general procedure, **1g** was obtained in 70% yield as a yellow solid. Melting point 46-48 °C. **<sup>1</sup>H NMR** (400 MHz, Chloroform-*d*) δ 7.39 – 7.30 (m, 2H), 7.27 (d, *J* = 5.0 Hz, 2H), 3.95 (s, 3H), 2.34 (s, 3H), 1.58 (s, 9H). **<sup>13</sup>C NMR** (101 MHz, Chloroform-*d*) δ 161.7, 159.8, 144.5, 138.5, 133.3, 132.0, 130.0, 128.5, 119.6, 101.8, 84.1, 80.6, 53.8, 28.1, 21.1. **HRMS (ESI-TOF)** *m/z*: [M+H]<sup>+</sup>Calcd for C<sub>17</sub>H<sub>20</sub>NO<sub>4</sub><sup>+</sup>: 302.1387; Found:302.1382.

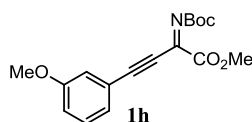

According to the general procedure, **1h** was obtained in 44% yield as a yellow solid. Melting point 44-46 °C. **<sup>1</sup>H NMR** (400 MHz, Chloroform-*d*) δ 7.34 – 7.24 (m, 1H), 7.17 – 7.13 (m, 1H), 7.05 (t, *J* = 2.0 Hz, 1H), 7.01 (ddd, *J* = 8.3, 2.7, 1.0 Hz, 1H), 3.96 (s, 3H), 3.80 (s, 3H), 1.58 (s, 9H). **<sup>13</sup>C NMR** (101 MHz, Chloroform-*d*) δ 161.6, 159.7, 159.4, 144.4, 129.8, 125.4, 120.7, 117.8, 117.2, 101.3, 84.2, 80.5, 55.4, 53.8, 28.1. **HRMS (ESI-TOF)** *m/z*: [M+H]<sup>+</sup>Calcd for C<sub>17</sub>H<sub>20</sub>NO<sub>5</sub><sup>+</sup>: 318.1336; Found:318.1335.

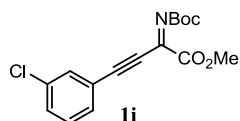

According to the general procedure, **1i** was obtained in 32% yield as a yellow solid. Melting point 45-47 °C. **<sup>1</sup>H NMR** (400 MHz, Chloroform-*d*) δ 7.66 – 7.65 (m, 1H), 7.60 – 7.54 (m, 1H), 7.51 – 7.46 (m, 1H), 7.40 – 7.35 (m, 1H), 3.96 (s, 3H), 1.45 (s, 9H). **<sup>13</sup>C NMR** (101 MHz, Chloroform-*d*) δ 168.9, 159.4, 138.5, 134.8, 133.3, 132.1, 131.8, 130.1, 120.7, 118.3, 95.6, 87.3, 79.7, 53.8, 28.2. **HRMS (ESI-TOF)** *m/z*: [M+H]<sup>+</sup>Calcd for C<sub>16</sub>H<sub>17</sub>ClNO<sub>4</sub><sup>+</sup>: 322.0841; Found: 322.0846.

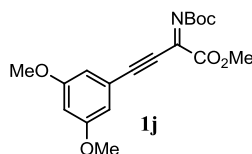

According to the general procedure, **1j** was obtained in 52% yield as a yellow solid. Melting point 69-71 °C. **<sup>1</sup>H NMR** (400 MHz, Chloroform-*d*) δ 6.68 (d, *J* = 2.3 Hz, 2H), 6.55 (t, *J* = 2.3 Hz, 1H), 3.96 (s, 3H), 3.78 (s, 6H), 1.58 (s, 9H). **<sup>13</sup>C NMR** (101 MHz, Chloroform-*d*) δ 161.6, 160.6, 159.7, 144.3, 121.0, 110.4, 104.5, 101.4, 84.2, 80.1, 55.5, 53.8, 28.1. **HRMS (ESI-TOF)** *m/z*: [M+H]<sup>+</sup>Calcd for C<sub>18</sub>H<sub>22</sub>NO<sub>6</sub><sup>+</sup>: 348.1442; Found: 348.1442.

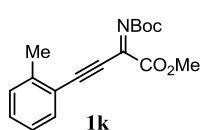

According to the general procedure, **1k** was obtained in 83% yield as a yellow solid. Melting point 30-33 °C. **<sup>1</sup>H NMR** (400 MHz, Chloroform-*d*) δ 7.49 (dd, *J* = 7.7, 1.4 Hz, 1H), 7.36 (td, *J* = 7.6, 1.4 Hz, 1H), 7.28 – 7.24 (m, 1H), 7.19 (td, *J* = 7.5, 1.2 Hz, 1H), 3.96 (s, 3H), 2.51 (s, 3H), 1.57 (s, 9H). **<sup>13</sup>C NMR** (101 MHz, Chloroform-*d*) δ 161.7, 159.8, 144.4, 142.5, 134.4, 133.3, 131.1, 129.9, 119.7, 100.8, 84.6, 84.1, 53.8, 28.1, 20.5. **HRMS (ESI-TOF)** *m/z*: [M+H]<sup>+</sup>Calcd for C<sub>17</sub>H<sub>20</sub>NO<sub>4</sub><sup>+</sup>: 302.1387; Found:302.1384.

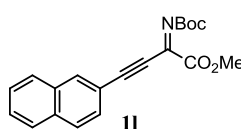

According to the general procedure, **1l** was obtained in 28% yield as a yellow solid. Melting point 72-74 °C. **<sup>1</sup>H NMR** (400 MHz, Chloroform-*d*) δ 8.13 (d, *J* = 1.6 Hz, 1H), 7.90 – 7.81 (m, 3H), 7.62 – 7.50 (m, 3H), 3.99 (s, 3H), 1.61 (s, 9H). **<sup>13</sup>C NMR** (101 MHz, Chloroform-*d*) δ 161.7, 159.8, 144.4, 134.2, 134.0, 132.6, 128.5, 128.24, 128.20, 128.0, 127.9, 127.1, 117.0, 102.0, 84.2, 81.1, 53.9, 28.1. **HRMS (ESI-TOF)** *m/z*: [M+H]<sup>+</sup>Calcd for C<sub>20</sub>H<sub>20</sub>NO<sub>4</sub><sup>+</sup>: 338.1387; Found:338.1386.

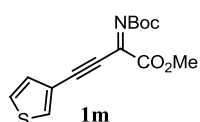

According to the general procedure, **1m** was obtained in 22% yield as a yellow solid. Melting point 37-40 °C. **<sup>1</sup>H NMR** (400 MHz, Chloroform-*d*) δ 7.73 (d, *J* = 5.0 Hz, 1H), 7.34 (dd, *J* = 5.1, 3.0 Hz, 1H), 7.19 (d, *J* = 5.0 Hz, 1H), 3.95 (s, 3H),

1.58 (s, 9H). **<sup>13</sup>C NMR** (101 MHz, Chloroform-*d*) δ 161.6, 159.8, 144.4, 134.0, 129.9, 126.3, 119.1, 96.8, 84.1, 81.0, 53.8, 28.0. **HRMS (ESI-TOF)** *m/z*: [M+H]<sup>+</sup>Calcd for C<sub>14</sub>H<sub>16</sub>NO<sub>4</sub>S<sup>+</sup> : 294.0795; Found: 294.0790.

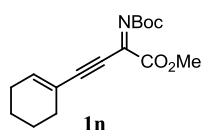

According to the general procedure, **1n** was obtained in 55% yield as a yellow solid. Melting point 45-47 °C. **<sup>1</sup>H NMR** (400 MHz, Chloroform-*d*) δ 6.47 (dt, *J* = 4.3, 2.3 Hz, 1H), 3.91 (s, 3H), 2.26 – 2.12 (m, 4H), 1.55 (s, 9H). **<sup>13</sup>C NMR** (101 MHz, Chloroform-*d*) δ 161.8, 159.9, 144.6, 143.3, 119.1, 103.9, 83.8, 79.2, 53.7, 28.1, 28.0, 26.2, 21.8, 20.0. **HRMS (ESI-TOF)** *m/z*: [M+H]<sup>+</sup>Calcd for C<sub>16</sub>H<sub>22</sub>NO<sub>4</sub><sup>+</sup> : 292.1544; Found: 292.1539.

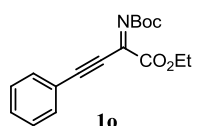

According to the general procedure, **1o** was obtained in 62% yield as a yellow solid. Melting point 58-60 °C. **<sup>1</sup>H NMR** (400 MHz, Chloroform-*d*) δ 7.58 – 7.52 (m, 2H), 7.48 – 7.44 (m, 1H), 7.40 – 7.35 (m, 2H), 4.42 (q, *J* = 7.2 Hz, 2H), 1.58 (s, 9H), 1.41 (t, *J* = 7.1 Hz, 3H). **<sup>13</sup>C NMR** (101 MHz, Chloroform-*d*) δ 161.2, 159.9, 144.8, 132.8, 131.0, 128.6, 119.9, 101.2, 84.1, 80.9, 63.3, 28.1, 14.0. **HRMS (ESI-TOF)** *m/z*: [M+H]<sup>+</sup>Calcd for C<sub>17</sub>H<sub>20</sub>NO<sub>4</sub><sup>+</sup> : 302.1387; Found: 302.1391.

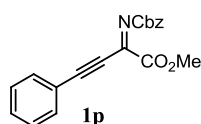

According to the general procedure, **1p** was obtained in 34% yield as a yellow oil. **<sup>1</sup>H NMR** (400 MHz, Chloroform-*d*) δ 7.96 – 7.90 (m, 1H), 7.50 – 7.47 (m, 1H), 7.44 – 7.41 (m, 2H), 7.36 – 7.35 (m, 3H), 7.32 – 7.28 (m, 3H), 5.35 (s, 2H), 3.97 (s, 3H). **<sup>13</sup>C NMR** (101 MHz, Chloroform-*d*) δ 162.0, 159.6, 134.9, 133.9, 133.8, 133.0, 128.8, 128.60, 128.55, 128.1, 121.2, 87.1, 81.0, 66.9, 53.9. **HRMS (ESI-TOF)** *m/z*: [M+H]<sup>+</sup>Calcd for C<sub>19</sub>H<sub>16</sub>NO<sub>4</sub><sup>+</sup> : 322.1074; Found: 322.1070.

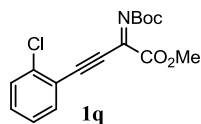

According to the general procedure, **1q** was obtained in 70% yield as a yellow solid. Melting point 43-45 °C. **<sup>1</sup>H NMR** (400 MHz, Chloroform-*d*) δ 7.56 (dd, *J* = 7.7, 1.6 Hz, 1H), 7.45 (dd, *J* = 8.1, 1.3 Hz, 1H), 7.39 (td, *J* = 7.7, 1.7 Hz, 1H), 7.29 (dd, *J* = 7.6, 1.3 Hz, 1H), 3.97 (s, 3H), 1.57 (s, 9H). **<sup>13</sup>C NMR** (101 MHz, Chloroform-*d*) δ 161.4, 159.5, 144.0, 137.2, 134.5, 132.0, 129.7, 126.7, 120.2, 97.3, 84.7, 84.3, 53.9, 28.1. **HRMS (ESI-TOF)** *m/z*: [M+H]<sup>+</sup>Calcd for C<sub>16</sub>H<sub>17</sub>ClNO<sub>4</sub><sup>+</sup> : 322.0841; Found: 322.0846.

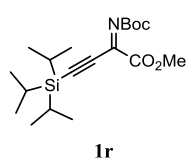

According to the general procedure, **1r** was obtained in 90% yield as a yellow oil. **<sup>1</sup>H NMR** (400 MHz, Chloroform-*d*) δ 3.90 (s, 3H), 1.54 (s, 9H), 1.10 (s, 21H). **<sup>13</sup>C NMR** (101 MHz, Chloroform-*d*) δ 161.4, 159.4, 143.7, 107.9, 96.4, 84.0, 53.7, 28.0, 18.4, 11.0. **HRMS (ESI-TOF)** *m/z*: [M+H]<sup>+</sup>Calcd for C<sub>19</sub>H<sub>34</sub>NO<sub>4</sub>Si<sup>+</sup> : 368.2252; Found: 368.2248.

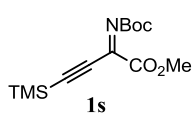

According to the general procedure, **1s** was obtained in 38% yield as a yellow oil. **<sup>1</sup>H NMR** (400 MHz, Chloroform-*d*) δ 3.90 (s, 3H), 1.53 (s, 9H), 0.23 (s, 9H). **<sup>13</sup>C NMR** (101 MHz, Chloroform-*d*) δ 161.4, 159.4, 143.9, 109.8, 94.0, 84.0, 53.7, 28.0, -0.9. **HRMS (ESI-TOF)** *m/z*: [M+H]<sup>+</sup>Calcd for C<sub>13</sub>H<sub>22</sub>NO<sub>4</sub>Si<sup>+</sup> : 284.1313; Found: 284.1312.

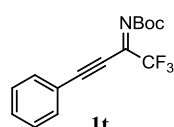

According to the general procedure, **1s** was obtained in 58% yield as a yellow oil. **<sup>1</sup>H NMR** (400 MHz, Chloroform-*d*) δ 7.57 – 7.52 (m, 2H), 7.51 – 7.47 (m, 1H), 7.43 – 7.37 (m, 2H), 1.60 (s, 9H). **<sup>13</sup>C NMR** (101 MHz, Chloroform-*d*) δ 158.7, 143.0 (d, *J* = 40.9 Hz), 132.8, 131.6, 128.8, 118.9, 118.0 (d, *J* = 278.3 Hz), 102.4,

84.7, 77.6, 27.9. **<sup>19</sup>F NMR** (376 MHz, Chloroform-d)  $\delta$  -72.37. **HRMS (ESI-TOF)**  $m/z$ :  $[M+H]^+$  Calcd for  $C_{15}H_{15}F_3NO_2^+$ : 298.1050; Found: 298.1058. The spectrum matched the literature data.<sup>2</sup>

### 3. General procedure for the pyrrolo[2,1-a]isoquinolines

**Procedure A:** To a 100 mL dry round-bottom flask was added 1-methylisoquinoline (0.13 mL, 1.0 mmol, 1.0 equiv), ethyl bromopyruvate (0.12 mL, 1.0 mmol, 1.0 equiv), and  $NaHCO_3$  (0.168 g, 2.0 equiv) in EtOH (0.1 M). The mixture was stirred at 120 °C in an oil bath and monitored by TLC until completion of the reaction. The solvent was removed by rotovapor and the residue was directly purified by flash chromatography on silica gel (petroleum ether/ethyl acetate 50:1) to afford the product **2a**, methyl bromopyruvate was subjected instead of ethyl bromopyruvate affording the corresponding product **2b**.

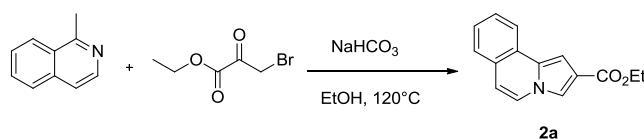

**Procedure B:** To a solution of 3-bromopyruvic acid (834.8 mg, 5 mmol, 1.0 equiv) and BnOH (0.57 mL, 5.5 mmol, 1.1 equiv) in toluene (10 mL, 0.5 M) was added TsOH (0.1722 g, 20 mol%) and montmorillonite (2.822 g, 10 mmol, 2.0 equiv) and the resulting solution was stirred at 50 °C for 1 hour. The resulting reaction mixture was filtered by celite and concentrated under vacuum to yield bromopyruvate as a yellow oil. The crude product was used in next step without further purification. Bromopyruvate was subjected to the subsequent step according to procedure A, affording the corresponding products **2c-2d**.

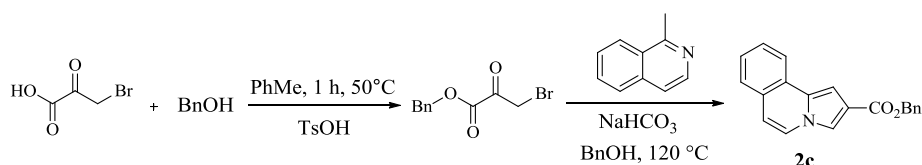

**Procedure C:** Acetophenone oxime (1.0 mmol),  $[Cp^*RhCl_2]_2$  (15.45 mg, 2.5 mol%),  $K_2CO_3$  (276.4 mg, 2.0 mmol) and n-butyl vinyl ether (0.26 mL, 2.0 mmol) were mixed in dry MeCN (5 mL) and then HFIP (0.5 mL) was added. The reaction mixture was stirred at 70 °C for 3 days. The mixture was then opened to air and evaporated in vacuum. The residue was subjected to column chromatography on silica gel (petroleum ether/ethyl acetate 15:1), which furnished target the methylisoquinoline.<sup>3</sup> The obtained methylisoquinolines were subjected the next step according to procedure A.

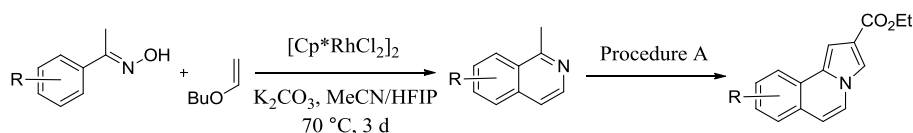

**Procedure D:** A mixture of isoquinoline (3 mmol), MBH carbonate (230.3 mg, 1 mmol),  $Cu(OAc)_2 \cdot H_2O$  (39.9 mg, 20 mol%), and NMP (1 mL, 0.1 M) was stirred at 120 °C in air. Upon the consumption of MBH carbonate (monitored by TLC), the mixture was concentrated and the residue was purified by a silica gel flash chromatography (petroleum ether/EtOAc 30:1) to afford the product.<sup>4</sup>

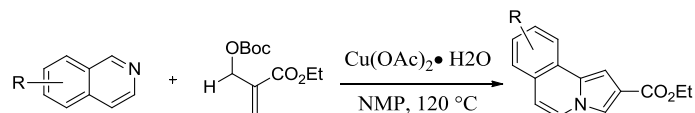

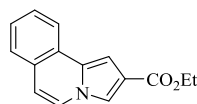

Following the general procedure A, compound **2a** was isolated in 67% yield as a yellow solid. Melting point 82-84 °C. **<sup>1</sup>H NMR** (400 MHz, Chloroform-*d*) δ 8.01 (d, *J* = 7.9 Hz, 1H), 7.79 (d, *J* = 1.6 Hz, 1H), 7.67 (d, *J* = 7.3 Hz, 1H), 7.57 – 7.45 (m, 2H), 7.42 – 7.31 (m, 2H), 6.79 (d, *J* = 7.4 Hz, 1H), 4.37 (q, *J* = 7.1 Hz, 2H), 1.40 (t, *J* = 7.1 Hz, 3H). **<sup>13</sup>C NMR** (101 MHz, Chloroform-*d*) δ 165.2, 130.4, 128.2, 127.2, 126.8, 126.6, 126.5, 124.3, 122.4, 118.9, 118.8, 113.4, 101.2, 60.4, 14.6. **HRMS (ESI-TOF)** *m/z*: [M+H]<sup>+</sup> Calcd for C<sub>15</sub>H<sub>14</sub>NO<sub>2</sub><sup>+</sup> 240.1019; Found: 240.1023.

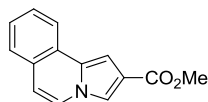

Following the general procedure A, compound **2b** was isolated in 51% yield as a white solid. Melting point 123-125 °C. **<sup>1</sup>H NMR** (400 MHz, Chloroform-*d*) δ 8.01 (d, *J* = 8.0 Hz, 1H), 7.78 (d, *J* = 1.6 Hz, 1H), 7.66 (d, *J* = 7.4 Hz, 1H), 7.57 – 7.45 (m, 2H), 7.38 (td, *J* = 7.5, 1.2 Hz, 1H), 7.34 – 7.31 (m, 1H), 6.79 (d, *J* = 7.4 Hz, 1H), 3.90 (s, 3H). **<sup>13</sup>C NMR** (101 MHz, Chloroform-*d*) δ 165.6, 130.5, 128.2, 127.2, 126.8, 126.6, 126.5, 124.3, 122.4, 118.9, 118.5, 113.5, 101.2, 51.6. **HRMS (ESI-TOF)** *m/z*: [M+H]<sup>+</sup> Calcd for C<sub>14</sub>H<sub>12</sub>NO<sub>2</sub><sup>+</sup> 226.0863; Found: 226.0865.

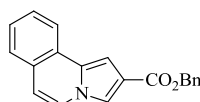

Following the general procedure B, compound **2c** was isolated in 21% yield as a white solid. Melting point 113-114 °C. **<sup>1</sup>H NMR** (400 MHz, Chloroform-*d*) δ 8.00 (d, *J* = 8.0 Hz, 1H), 7.81 (d, *J* = 1.6 Hz, 1H), 7.63 (d, *J* = 7.4 Hz, 1H), 7.57 – 7.45 (m, 4H), 7.45 – 7.32 (m, 5H), 6.78 (d, *J* = 7.4 Hz, 1H), 5.38 (s, 2H). **<sup>13</sup>C NMR** (101 MHz, Chloroform-*d*) δ 164.9, 136.6, 130.4, 128.7, 128.3, 128.22, 128.18, 127.2, 126.8, 126.6, 126.4, 124.2, 122.4, 119.0, 118.4, 113.5, 101.3, 66.1. **HRMS (ESI-TOF)** *m/z*: [M+H]<sup>+</sup> Calcd for C<sub>20</sub>H<sub>16</sub>NO<sub>2</sub><sup>+</sup> 302.1176; Found: 302.1178.

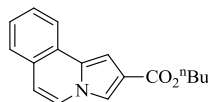

Following the general procedure B, compound **2d** was isolated in 39% yield as a yellow solid. Melting point 77-79 °C. **<sup>1</sup>H NMR** (400 MHz, Chloroform-*d*) δ 8.00 (d, *J* = 8.0 Hz, 1H), 7.77 (d, *J* = 1.6 Hz, 1H), 7.64 (d, *J* = 7.4 Hz, 1H), 7.55 – 7.44 (m, 2H), 7.37 (td, *J* = 7.5, 1.3 Hz, 1H), 7.33 – 7.30 (m, 1H), 6.77 (d, *J* = 7.4 Hz, 1H), 4.32 (t, *J* = 6.7 Hz, 2H), 1.76 (dq, *J* = 8.4, 6.7 Hz, 2H), 1.56 – 1.44 (m, 2H), 1.00 (t, *J* = 7.4 Hz, 3H). **<sup>13</sup>C NMR** (101 MHz, Chloroform-*d*) δ 165.2, 130.3, 128.1, 127.2, 126.8, 126.5, 126.4, 124.2, 122.4, 118.9, 118.8, 113.3, 101.1, 64.2, 31.0, 19.4, 13.9. **HRMS (ESI-TOF)** *m/z*: [M+H]<sup>+</sup> Calcd for C<sub>17</sub>H<sub>18</sub>NO<sub>2</sub><sup>+</sup> 268.1332; Found: 268.1330.

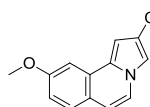

Following the general procedure D, compound **2e** was isolated in 17% yield as a yellow solid. Melting point 129-133 °C. **<sup>1</sup>H NMR** (400 MHz, Chloroform-*d*) δ 7.79 – 7.74 (m, 1H), 7.60 – 7.53 (m, 1H), 7.49 – 7.42 (m, 1H), 7.44 – 7.39 (m, 1H), 7.32 – 7.27 (m, 1H), 6.99 (dd, *J* = 8.6, 2.5 Hz, 1H), 6.77 – 6.71 (m, 1H), 4.42 – 4.32 (m, 1H), 3.95 – 3.91 (m, 3H), 1.44 – 1.38 (m, 3H). **<sup>13</sup>C NMR** (101 MHz, Chloroform-*d*) δ 165.2, 159.6, 130.3, 128.8, 127.7, 122.2, 120.7, 118.8, 118.7, 115.7, 113.1, 104.4, 101.2, 60.3, 55.6, 14.6. **HRMS (ESI-TOF)** *m/z*: [M+H]<sup>+</sup> Calcd for C<sub>16</sub>H<sub>16</sub>NO<sub>3</sub><sup>+</sup> 270.1125; Found: 270.1121.

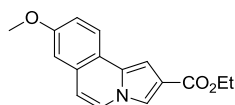

Following the general procedure D, compound **2f** was isolated in 21% yield as a yellow solid. Melting point 114-115 °C. **<sup>1</sup>H NMR** (400 MHz, Chloroform-*d*) δ 7.92 (d, *J* = 8.7 Hz, 1H), 7.74 (d, *J* = 1.3 Hz, 1H), 7.65 (d, *J* = 7.4 Hz, 1H), 7.18 (s, 1H), 7.10 (dd, *J* = 8.7, 2.6 Hz, 1H), 6.98 (d, *J* = 2.6 Hz, 1H), 6.72 (d, *J* = 7.3 Hz, 1H), 4.36 (q, *J* = 7.1 Hz, 2H), 3.89 (s, 3H), 1.40 (t, *J* = 7.1 Hz, 3H). **<sup>13</sup>C NMR** (101 MHz, Chloroform-*d*) δ 165.3, 158.4, 130.6, 128.2, 124.8, 124.0, 120.4, 118.9, 118.2, 117.0, 113.1, 109.2, 99.5,

60.3, 55.6, 14.6. **HRMS (ESI-TOF)**  $m/z$ :  $[M+H]^+$  Calcd for  $C_{16}H_{16}NO_3^+$  270.1125; Found: 270.1128.

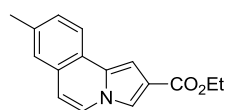

Following the general procedure C, compound **2g** was isolated in 47% yield as a yellow solid. Melting point 103-105 °C.  **$^1H$  NMR** (400 MHz, Chloroform-*d*)  $\delta$  7.86 (d,  $J$  = 8.6 Hz, 1H), 7.72 (d,  $J$  = 1.7 Hz, 1H), 7.56 (d,  $J$  = 7.3 Hz, 1H), 7.31 – 7.23 (m, 3H), 4.38 (d,  $J$  = 7.1 Hz, 2H), 2.42 (s, 3H), 1.42 (d,  $J$  = 7.2 Hz, 3H).  **$^{13}C$  NMR** (101 MHz, Chloroform-*d*)  $\delta$  165.3, 136.4, 130.6, 129.5, 127.1, 126.9, 124.3, 124.1, 122.4, 118.8, 118.5, 113.3, 100.5, 60.3, 21.5, 14.6. **HRMS (ESI-TOF)**  $m/z$ :  $[M+H]^+$  Calcd for  $C_{16}H_{16}NO_2^+$  254.1176; Found: 254.1179.

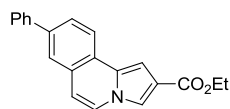

Following the general procedure C, compound **2h** was isolated in 34% yield as a yellow solid. Melting point 93-96 °C.  **$^1H$  NMR** (400 MHz, Chloroform-*d*)  $\delta$  8.05 (d,  $J$  = 8.4 Hz, 1H), 7.79 (d,  $J$  = 1.6 Hz, 1H), 7.73 (m,  $J$  = 7.5 Hz, 2H), 7.67 (m,  $J$  = 7.5 Hz, 3H), 7.48 (t,  $J$  = 7.5 Hz, 2H), 7.41 – 7.35 (m, 2H), 6.82 (d,  $J$  = 7.3 Hz, 1H), 4.39 (q,  $J$  = 7.1 Hz, 2H), 1.42 (t,  $J$  = 7.2 Hz, 3H).  **$^{13}C$  NMR** (101 MHz, Chloroform-*d*)  $\delta$  165.1, 140.6, 139.3, 130.2, 129.1, 129.0, 127.6, 127.3, 127.23, 127.20, 125.5, 125.4, 124.6, 122.9, 118.9, 113.5, 101.3, 60.3, 14.6. **HRMS (ESI-TOF)**  $m/z$ :  $[M+H]^+$  Calcd for  $C_{21}H_{18}NO_2^+$  316.1332; Found: 316.1337.

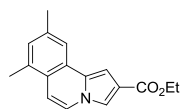

Following the general procedure C, compound **2i** was isolated in 48% yield as a yellow solid. Melting point 116-118 °C.  **$^1H$  NMR** (400 MHz, Chloroform-*d*)  $\delta$  7.72 (q,  $J$  = 1.5 Hz, 1H), 7.65 (s, 1H), 7.56 (dd,  $J$  = 5.1, 2.7 Hz, 1H), 7.28 (d,  $J$  = 1.7 Hz, 1H), 7.02 (s, 1H), 6.87 – 6.81 (m, 1H), 4.38 (q,  $J$  = 7.1 Hz, 2H), 2.48 (d,  $J$  = 2.5 Hz, 3H), 2.43 (s, 3H), 1.41 (t,  $J$  = 7.1 Hz, 3H).  **$^{13}C$  NMR** (101 MHz, Chloroform-*d*)  $\delta$  165.2, 137.6, 134.0, 130.6, 129.3, 126.4, 123.1, 123.0, 120.3, 118.7, 118.3, 109.6, 100.8, 60.2, 21.7, 19.3, 14.6. **HRMS (ESI-TOF)**  $m/z$ :  $[M+H]^+$  Calcd for  $C_{17}H_{18}NO_2^+$  268.1332; Found: 268.1328.

## 5. General procedure for the asymmetric synthesis of axially chiral allenes

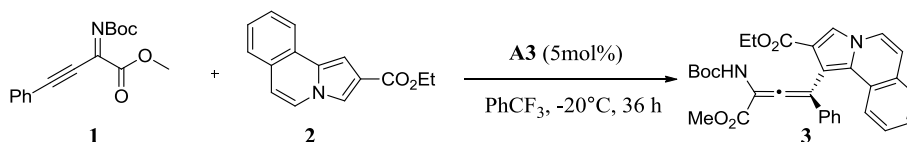

To a 4 mL vial was added  $\beta,\gamma$ -alkynyl- $\alpha$ -imino ester **1** (0.1 mmol, 1.0 equiv), pyrrolo[2,1-*a*]isoquinoline **2** (0.12 mmol, 1.2 equiv) and **A3** (0.005 mmol, 5 mol%) in  $PhCF_3$  (0.5 mL). The mixture was stirred at -20 °C and monitored by TLC until completion of the reaction. The solvent was removed by rotovapor and the residue was directly purified by flash chromatography on silica gel (petroleum ether/ethyl acetate 15:1) to afford the product **3**.

## 6. Scale-up synthesis of the product 3a

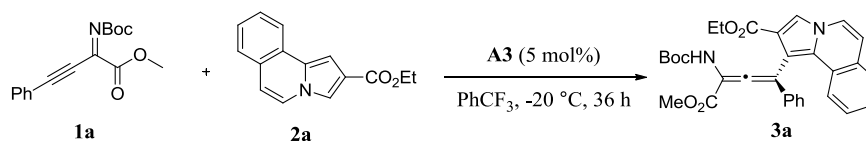

To a 25 mL round-bottom flask was added  $\beta,\gamma$ -alkynyl- $\alpha$ -imino ester (**1a**) (1.0 mmol, 287 mg, 1.0 equiv), pyrrolo[2,1-*a*]isoquinoline (**2a**) (1.2 mmol, 287 mg, 1.2 equiv) and **A3** (0.05 mmol, 5 mol%) in  $PhCF_3$  (5 mL). The mixture was stirred at -20 °C for 36 h. The solvent was removed by rotovapor and

the residue was directly purified by flash chromatography on silica gel (petroleum ether/ethyl acetate 15:1) to afford the product **3a** (380.1 mg) in 72% yield as a faint yellow solid.

## 7. Procedure for the late-stage functionalizations of **3a**.

### a) Procedure for the deprotection of **3a**.

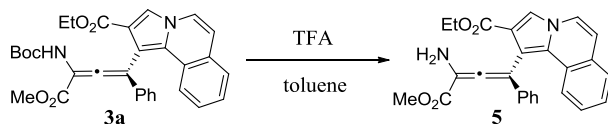

Compound **3a** (26.3 mg, 0.05 mmol) was dissolved in toluene (1.0 mL). Then TFA (2 equiv) was added and the reaction mixture was allowed to stir at 5 °C. After 1 hour, the reaction was monitored by TLC until **3a** disappeared completely. After that, the reaction mixture was directly purified by column chromatography on silica gel (petroleum ether/ethyl acetate 5:1) to provide product **5** bearing a free amino group as a reddish brown oil (19.2 mg, 90% yield).

### b) C3-functionalization of **3a** with ketomalonate.

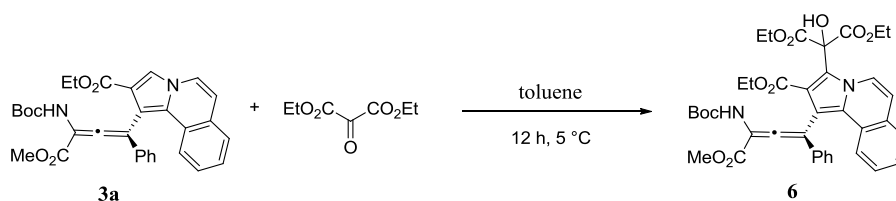

To a solution of **3a** (0.105 mg, 0.2 mmol) in toluene (2.0 mL) was added diethyl ketomalonate (5.0 equiv). The mixture was stirred at 5 °C for 12 h. After reaction, the solvent was removed by rotovapor and the residue was directly purified by flash column chromatography on silica gel (petroleum ether/ethyl acetate 6:1) to afford the product **6** as a yellow solid (94.7 mg, 68% yield).

## 9. Analytical data

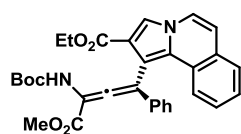

The compound **3a** was prepared according to the general procedure. The product was obtained as a yellow solid (35.6 mg, 68% yield). Melting point 83.8-86.8 °C. The 97% ee was measured by HPLC using a chiral stationary phase [Daicel IG, *n*-hexane:*i*-PrOH=70:30, 1.0 mL/min),  $t_R$  = 9.838 min (major),  $t_R$  = 15.413 min (minor)],  $[\alpha]_D^{30}$  = -27.2 ( $c$  = 0.71, CHCl<sub>3</sub>). **<sup>1</sup>H NMR** (400 MHz, Chloroform-*d*)  $\delta$  8.50 (d,  $J$  = 77.1 Hz, 1H), 7.90 (s, 1H), 7.68 (d,  $J$  = 7.4 Hz, 1H), 7.51 (m,  $J$  = 7.5 Hz, 3H), 7.39 – 7.27 (m, 3H), 7.25 (m,  $J$  = 7.9 Hz, 2H), 6.81 (d,  $J$  = 7.3 Hz, 1H), 6.14 (s, 1H), 4.27 – 4.07 (m, 2H), 3.69 (s, 3H), 1.44 (s, 9H), 1.02 (t,  $J$  = 7.1 Hz, 3H). **<sup>13</sup>C NMR** (101 MHz, Chloroform-*d*)  $\delta$  165.9, 164.4, 151.8, 135.4, 128.5, 127.9, 127.7, 127.4, 126.8, 126.4, 126.3, 124.2, 119.6, 113.8, 110.1, 102.5, 80.4, 60.2, 52.9, 28.3, 13.8. **HRMS (ESI-TOF)**  $m/z$ : [M+H]<sup>+</sup> Calcd for C<sub>31</sub>H<sub>31</sub>N<sub>2</sub>O<sub>6</sub><sup>+</sup> 527.2177; Found: 527.2172.

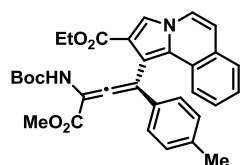

The compound **3b** was prepared according to the general procedure. The product was obtained as a yellow solid (32.4 mg, 60% yield). Melting point 95.2-97.1 °C. The 96% ee was measured by HPLC using a chiral stationary phase [Daicel IG, *n*-hexane:*i*-PrOH=70:30, 1.0 mL/min),  $t_R$  = 10.065 min (major),  $t_R$  = 16.285 min (minor)],  $[\alpha]_D^{30}$  = -29.9 ( $c$  = 0.65, CHCl<sub>3</sub>). **<sup>1</sup>H NMR** (400 MHz, Chloroform-*d*)  $\delta$  8.51 (d,  $J$  = 82.7 Hz, 1H), 7.89 (s, 1H), 7.67 (d,  $J$  = 7.3 Hz, 1H), 7.52 – 7.46 (m, 1H), 7.42 – 7.28 (m, 4H), 7.11 (d,  $J$  = 7.8 Hz, 2H), 6.80 (d,  $J$  = 7.3 Hz, 1H), 6.12 (s, 1H), 4.28 – 4.06 (m, 2H), 3.67 (s, 3H), 2.32 (s, 3H), 1.44 (s, 9H), 1.06 (t,  $J$  = 7.1 Hz, 3H). **<sup>13</sup>C NMR** (101 MHz,

Chloroform-*d*)  $\delta$  166.0, 164.5, 151.9, 137.7, 132.5, 129.2, 127.6, 127.4, 126.7, 126.4, 126.3, 124.2, 119.5, 113.8, 110.3, 102.3, 80.3, 60.1, 52.8, 28.4, 21.4, 13.9. **HRMS (ESI-TOF)**  $m/z$ :  $[M+H]^+$  Calcd for  $C_{32}H_{33}N_2O_6^+$  541.2333; Found: 541.2329

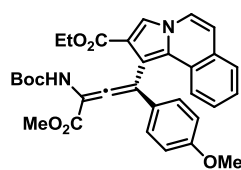

The compound **3c** was prepared according to the general procedure. The product was obtained as a yellow oil (39.0 mg, 70% yield). Melting point 94.1–96.0 °C. The 94% ee was measured by HPLC using a chiral stationary phase [Daicel IG, *n*-hexane:*i*-PrOH=70:30, 1.0 mL/min],  $t_R$  = 12.307 min (major),  $t_R$  = 19.382 min (minor),  $[\alpha]_D^{30}$  = +19.4 ( $c$  = 0.65,  $CHCl_3$ ).  **$^1H$  NMR** (400 MHz, Chloroform-*d*)  $\delta$  8.50 (d,  $J$  = 94.0 Hz, 1H), 7.89 (s, 1H), 7.67 (d,  $J$  = 7.4 Hz, 1H), 7.52 – 7.46 (m, 1H), 7.46 – 7.40 (m, 2H), 7.32 (m,  $J$  = 7.2, 6.7 Hz, 2H), 6.82 (m,  $J$  = 13.5, 7.9 Hz, 3H), 6.12 (s, 1H), 4.28 – 4.06 (m, 2H), 3.77 (s, 3H), 3.67 (s,  $J$  = 40.9 Hz, 3H), 1.44 (s, 9H), 1.07 (t,  $J$  = 7.1 Hz, 3H).  **$^{13}C$  NMR** (101 MHz, Chloroform-*d*)  $\delta$  166.0, 164.7, 159.5, 152.1, 129.0, 127.8, 127.3, 126.8, 126.4, 126.3, 124.2, 119.5, 114.0, 113.8, 110.4, 102.2, 80.3, 60.2, 55.4, 52.8, 28.4, 13.9. **HRMS (ESI-TOF)**  $m/z$ :  $[M+H]^+$  Calcd for  $C_{32}H_{33}N_2O_7^+$  557.2283; Found: 557.2284.

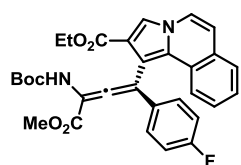

The compound **3d** was prepared according to the general procedure. The product was obtained as a yellow oil (32.6 mg, 60% yield). Melting point 73.4–75.4 °C. The 96% ee was measured by HPLC using a chiral stationary phase [Daicel IG, *n*-hexane:*i*-PrOH=70:30, 1.0 mL/min],  $t_R$  = 7.408 min (major),  $t_R$  = 10.288 min (minor),  $[\alpha]_D^{30}$  = -18.3 ( $c$  = 0.65,  $CHCl_3$ ).  **$^1H$  NMR** (400 MHz, Chloroform-*d*)  $\delta$  8.47 (d,  $J$  = 86.2 Hz, 1H), 7.90 (s, 1H), 7.68 (d,  $J$  = 7.4 Hz, 1H), 7.50 (q,  $J$  = 7.2, 5.3 Hz, 3H), 7.34 (td,  $J$  = 7.5, 6.9, 4.3 Hz, 2H), 6.99 (t,  $J$  = 8.7 Hz, 2H), 6.82 (d,  $J$  = 7.4 Hz, 1H), 6.13 (s, 1H), 4.28 – 4.06 (m, 2H), 3.72 (s, 3H), 1.45 (s, 9H), 1.06 (t,  $J$  = 7.1 Hz, 3H).  **$^{13}C$  NMR** (101 MHz, Chloroform-*d*)  $\delta$  165.80, 163.94, 161.48, 151.81, 131.55, 129.41 (d,  $J$  = 8.3 Hz), 127.68, 127.36, 126.84, 126.54, 126.23, 124.18, 119.56, 115.44 (d,  $J$  = 21.8 Hz), 113.87, 112.63, 110.02, 102.55, 80.47, 60.19, 52.94, 28.37, 13.90.  **$^{19}F$  NMR** (376 MHz, Acetone- $d_6$ )  $\delta$  -116.05. **HRMS (ESI-TOF)**  $m/z$ :  $[M+H]^+$  Calcd for  $C_{31}H_{30}FN_2O_6^+$  545.2083; Found: 545.2078.

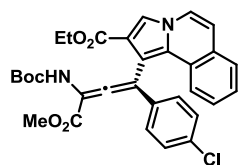

The compound **3e** was prepared according to the general procedure. The product was obtained as a yellow solid (29.1 mg, 52% yield). Melting point 89.4–91.6 °C. The 96% ee was measured by HPLC using a chiral stationary phase [Daicel IG, *n*-hexane:*i*-PrOH=70:30, 1.0 mL/min],  $t_R$  = 7.440 min (major),  $t_R$  = 9.332 min (minor),  $[\alpha]_D^{30}$  = -33.4 ( $c$  = 0.58,  $CHCl_3$ ).  **$^1H$  NMR** (400 MHz, Chloroform-*d*)  $\delta$  8.44 (d,  $J$  = 96.8 Hz, 1H), 7.90 (s, 1H), 7.68 (d,  $J$  = 7.3 Hz, 1H), 7.58 – 7.48 (m, 1H), 7.45 (d,  $J$  = 8.2 Hz, 2H), 7.35 – 7.31 (m, 2H), 7.27 (d,  $J$  = 8.2 Hz, 2H), 6.82 (d,  $J$  = 7.4 Hz, 1H), 6.13 (s, 1H), 4.28 – 4.06 (m, 2H), 3.72 (s, 3H), 1.45 (s, 9H), 1.07 (t,  $J$  = 7.2 Hz, 3H).  **$^{13}C$  NMR** (101 MHz, Chloroform-*d*)  $\delta$  165.7, 164.3, 151.7, 134.1, 133.7, 131.4, 129.0, 128.7, 127.7, 127.4, 126.8, 126.6, 126.2, 124.1, 119.6, 113.9, 112.7, 109.6, 102.7, 80.5, 60.2, 53.0, 29.8, 28.4, 13.9. **HRMS (ESI-TOF)**  $m/z$ :  $[M+H]^+$  Calcd for  $C_{31}H_{30}ClN_2O_6^+$  561.1787; Found: 561.1788.

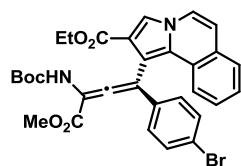

The compound **3f** was prepared according to the general procedure. The product was obtained as a yellow solid (36.2 mg, 60% yield). Melting point 86.4–88.3 °C. The 96% ee was measured by HPLC using a chiral stationary phase [Daicel IG, *n*-hexane:*i*-PrOH=70:30, 1.0 mL/min],  $t_R$  = 7.605 min (major),  $t_R$  = 9.285 min (minor),  $[\alpha]_D^{30}$  = -11.2 ( $c$  = 0.72,  $CHCl_3$ ).  **$^1H$  NMR**

(400 MHz, Chloroform-*d*)  $\delta$  8.44 (d,  $J$  = 99.2 Hz, 1H), 7.89 (s, 1H), 7.68 (d,  $J$  = 7.4 Hz, 1H), 7.53 – 7.47 (m, 1H), 7.46 – 7.29 (m, 6H), 6.82 (d,  $J$  = 7.4 Hz, 1H), 6.13 (s, 1H), 4.28 – 4.06 (m, 2H), 3.73 (s, 3H), 1.44 (s, 9H), 1.07 (t,  $J$  = 7.3 Hz, 3H).  **$^{13}\text{C}$  NMR** (101 MHz, Chloroform-*d*)  $\delta$  165.7, 164.4, 151.7, 134.6, 131.6, 129.3, 127.4, 126.9, 126.6, 126.2, 124.2, 122.0, 119.6, 113.9, 112.8, 109.5, 102.8, 80.6, 60.2, 53.0, 28.4, 13.9. **HRMS (ESI-TOF)**  $m/z$ :  $[\text{M}+\text{H}]^+$  Calcd for  $\text{C}_{31}\text{H}_{30}\text{BrN}_2\text{O}_6^+$  605.1282; Found: 605.1280.

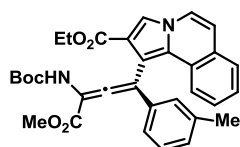

The compound **3g** was prepared according to the general procedure. The product was obtained as a yellow solid (31.3 mg, 58% yield). Melting point 67.6–70.8 °C. The 97% ee was measured by HPLC using a chiral stationary phase [Daicel IG, *n*-hexane:*i*-PrOH=70:30, 1.0 mL/min),  $t_R$  = 9.117 min (major),  $t_R$  = 14.570 min (minor)],  $[\alpha]_D^{30}$  = -39.8 ( $c$  = 0.63,  $\text{CHCl}_3$ ).  **$^1\text{H}$  NMR** (400 MHz, Chloroform-*d*)  $\delta$  8.50 (d,  $J$  = 69.3 Hz, 1H), 7.90 (s, 1H), 7.68 (d,  $J$  = 7.3 Hz, 1H), 7.55 – 7.47 (m, 1H), 7.39 – 7.24 (m, 4H), 7.18 (t,  $J$  = 7.6 Hz, 1H), 7.05 (d,  $J$  = 7.5 Hz, 1H), 6.81 (d,  $J$  = 7.3 Hz, 1H), 6.12 (s, 1H), 4.36 – 3.99 (m, 2H), 3.68 (s, 3H), 2.29 (s, 3H), 1.44 (s, 9H), 1.04 (t,  $J$  = 7.1 Hz, 3H).  **$^{13}\text{C}$  NMR** (101 MHz, Chloroform-*d*)  $\delta$  166.0, 164.4, 152.0, 137.9, 135.3, 128.8, 128.33, 128.27, 127.7, 127.4, 126.8, 126.41, 126.37, 124.9, 124.2, 119.6, 113.8, 110.3, 102.4, 80.4, 60.1, 52.9, 28.4, 21.6, 13.8. **HRMS (ESI-TOF)**  $m/z$ :  $[\text{M}+\text{H}]^+$  Calcd for  $\text{C}_{32}\text{H}_{33}\text{N}_2\text{O}_6^+$  541.2333; Found: 541.2335.

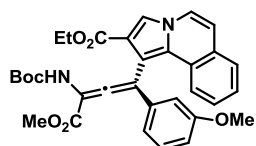

The compound **3h** was prepared according to the general procedure. The product was obtained as a yellow solid (35.6 mg, 64% yield). Melting point 67.8–69.2 °C. The 95% ee was measured by HPLC using a chiral stationary phase [Daicel IG, *n*-hexane:*i*-PrOH=70:30, 1.0 mL/min),  $t_R$  = 12.210 min (major),  $t_R$  = 18.113 min (minor)],  $[\alpha]_D^{30}$  = -14.4 ( $c$  = 0.71,  $\text{CHCl}_3$ ).  **$^1\text{H}$  NMR** (400 MHz, )  $\delta$  8.50 (d,  $J$  = 71.7 Hz, 1H), 7.89 (s, 1H), 7.67 (d,  $J$  = 7.3 Hz, 1H), 7.52 – 7.46 (m, 1H), 7.35 – 7.29 (m, 2H), 7.24 – 7.15 (m, 2H), 7.06 (d,  $J$  = 7.7 Hz, 1H), 6.84 – 6.77 (m, 2H), 6.11 (s, 1H), 4.19 – 4.10 (m, 2H), 3.76 (s, 3H), 3.67 (s, 3H), 1.44 (s, 9H), 1.06 (t,  $J$  = 7.1 Hz, 3H).  **$^{13}\text{C}$  NMR** (101 MHz, Chloroform-*d*)  $\delta$  165.9, 164.2, 159.7, 151.9, 136.9, 129.3, 127.7, 127.4, 126.8, 126.4, 126.3, 124.2, 120.4, 119.5, 113.8, 113.5, 110.1, 102.5, 80.4, 60.2, 55.3, 52.9, 28.4, 13.9. **HRMS (ESI-TOF)**  $m/z$ :  $[\text{M}+\text{H}]^+$  Calcd for  $\text{C}_{32}\text{H}_{33}\text{N}_2\text{O}_7^+$  557.2283; Found: 557.2282.

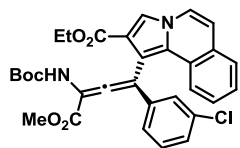

The compound **3i** was prepared according to the general procedure. The product was obtained as a yellow solid (31.4 mg, 56% yield). Melting point 81.4–84.3 °C. The 94% ee was measured by HPLC using a chiral stationary phase [Daicel IG, *n*-hexane:*i*-PrOH=70:30, 1.0 mL/min),  $t_R$  = 8.637 min (major),  $t_R$  = 10.445 min (minor)],  $[\alpha]_D^{30}$  = -30.8 ( $c$  = 0.63,  $\text{CHCl}_3$ ).  **$^1\text{H}$  NMR** (400 MHz, Chloroform-*d*)  $\delta$  8.47 (d,  $J$  = 90.3 Hz, 1H), 7.90 (s, 1H), 7.69 (d,  $J$  = 7.3 Hz, 1H), 7.54 – 7.46 (m, 2H), 7.38 – 7.33 (m, 3H), 7.28 – 7.19 (m, 2H), 6.84 (d,  $J$  = 6.1 Hz, 1H), 6.15 (s, 1H), 4.21 (bs, 2H), 3.73 (s, 3H), 1.44 (s, 9H), 1.05 (bs, 3H).  **$^{13}\text{C}$  NMR** (101 MHz, Chloroform-*d*)  $\delta$  165.7, 164.3, 151.7, 137.7, 134.4, 129.7, 127.9, 127.6, 127.5, 126.9, 126.6, 126.2, 125.9, 124.2, 119.7, 113.9, 112.6, 109.2, 103.5, 80.6, 60.3, 53.1, 28.4, 13.9. **HRMS (ESI-TOF)**  $m/z$ :  $[\text{M}+\text{H}]^+$  Calcd for  $\text{C}_{31}\text{H}_{30}\text{ClN}_2\text{O}_6^+$  561.1787; Found: 561.1791.

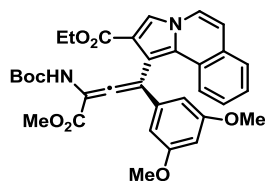

The compound **3j** was prepared according to the general procedure. The product was obtained as a yellow solid (42.2 mg, 72% yield). Melting point 79.3–81.4 °C. The 96% ee was measured by HPLC using a chiral stationary

phase [Daicel IG, *n*-hexane:*i*-PrOH=70:30, 1.0 mL/min),  $t_R$  = 11.313 min (major),  $t_R$  = 16.722 min (minor)],  $[\alpha]_D^{30}$  = -27.7 ( $c$  = 0.70, CHCl<sub>3</sub>). **<sup>1</sup>H NMR** (400 MHz, Chloroform-*d*)  $\delta$  8.48 (d,  $J$  = 70.1 Hz, 1H), 7.88 (s, 1H), 7.66 (d,  $J$  = 7.3 Hz, 1H), 7.48 (d,  $J$  = 7.3 Hz, 1H), 7.39 – 7.29 (m, 2H), 6.91 – 6.63 (m, 3H), 6.37 (t,  $J$  = 2.3 Hz, 1H), 6.12 (s, 1H), 4.21 (bs, 2H), 3.72 (s, 9H), 1.45 (s, 9H), 1.11 (t,  $J$  = 7.2 Hz, 3H). **<sup>13</sup>C NMR** (101 MHz, Chloroform-*d*)  $\delta$  165.9, 164.4, 160.7, 151.9, 137.6, 127.6, 127.4, 126.7, 126.4, 126.3, 124.1, 119.5, 113.8, 106.3, 102.4, 99.9, 80.4, 60.1, 55.4, 52.9, 28.3, 14.0. **HRMS (ESI-TOF)**  $m/z$ :  $[M+H]^+$  Calcd for C<sub>33</sub>H<sub>34</sub>N<sub>2</sub>O<sub>8</sub><sup>+</sup> 587.2388; Found: 587.2383.

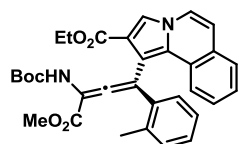

The compound **3k** was prepared according to the general procedure. The product was obtained as a yellow solid (11.3 mg, 21% yield). Melting point 78.7-81.6 °C. The 95% ee was measured by HPLC using a chiral stationary phase [Daicel IG, *n*-hexane:*i*-PrOH=70:30, 1.0 mL/min),  $t_R$  = 11.563 min (major),  $t_R$  = 22.637 min (minor)],  $[\alpha]_D^{30}$  = -84.3 ( $c$  = 0.23, CHCl<sub>3</sub>). **<sup>1</sup>H NMR** (500 MHz, Chloroform-*d*)  $\delta$  8.59 – 8.45 (m, 1H), 7.87 (d,  $J$  = 1.5 Hz, 1H), 7.68 (dd,  $J$  = 7.3, 1.5 Hz, 1H), 7.55 – 7.50 (m, 1H), 7.37 – 7.32 (m, 2H), 7.28 – 7.23 (m, 2H), 7.19 – 7.10 (m, 2H), 7.02 (t,  $J$  = 7.6 Hz, 1H), 6.82 (dd,  $J$  = 7.4, 1.5 Hz, 1H), 6.01 (s, 1H), 4.17 (qt,  $J$  = 7.2, 2.5 Hz, 2H), 3.65 (s, 3H), 2.64 (s, 3H), 1.40 (s, 9H), 1.06 (t,  $J$  = 7.2 Hz, 3H). **<sup>13</sup>C NMR** (126 MHz, Chloroform-*d*)  $\delta$  166.1, 164.4, 137.9, 133.9, 131.4, 128.8, 127.94, 127.86, 127.8, 127.4, 126.9, 126.5, 126.4, 126.0, 124.8, 124.3, 119.8, 118.7, 113.8, 112.3, 101.4, 80.4, 60.1, 52.7, 28.3, 22.4, 14.0. **HRMS (ESI-TOF)**  $m/z$ :  $[M+H]^+$  Calcd for C<sub>32</sub>H<sub>33</sub>N<sub>2</sub>O<sub>6</sub><sup>+</sup> 541.2333; Found: 541.2331

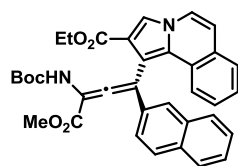

The compound **3l** was prepared according to the general procedure. The product was obtained as a yellow solid (40.9 mg, 71% yield). Melting point 126.4-128.2 °C. The 96% ee was measured by HPLC using a chiral stationary phase [Daicel IG, *n*-hexane:*i*-PrOH=70:30, 1.0 mL/min),  $t_R$  = 11.232 min (major),  $t_R$  = 19.642 min (minor)],  $[\alpha]_D^{30}$  = -32.3 ( $c$  = 0.60, CHCl<sub>3</sub>). **<sup>1</sup>H NMR** (500 MHz, Chloroform-*d*)  $\delta$  8.52 (d,  $J$  = 132.1 Hz, 1H), 7.96 (s, 1H), 7.85 – 7.77 (m, 3H), 7.76 – 7.69 (m, 2H), 7.68 – 7.63 (m, 1H), 7.53 – 7.48 (m, 1H), 7.44 – 7.34 (m, 2H), 7.30 (t,  $J$  = 7.0 Hz, 2H), 6.84 (d,  $J$  = 7.4 Hz, 1H), 6.17 (s, 1H), 4.23 – 4.03 (m, 2H), 3.71 (d,  $J$  = 67.5 Hz, 3H), 1.45 (s, 9H), 0.95 (t,  $J$  = 7.3 Hz, 3H). **<sup>13</sup>C NMR** (126 MHz, Chloroform-*d*)  $\delta$  165.9, 164.3, 151.9, 133.6, 133.3, 133.0, 128.5, 128.1, 127.7, 127.6, 126.8, 126.6, 126.5, 126.3, 126.1, 125.9, 124.2, 119.7, 113.8, 110.1, 102.8, 80.5, 60.2, 52.9, 28.4, 13.9. **HRMS (ESI-TOF)**  $m/z$ :  $[M+H]^+$  Calcd for C<sub>35</sub>H<sub>33</sub>N<sub>2</sub>O<sub>6</sub><sup>+</sup> 577.2333; Found: 577.2332.

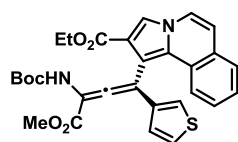

The compound **3m** was prepared according to the general procedure. The product was obtained as a yellow solid (33.0 mg, 62% yield). Melting point 69.6-72.3 °C. The 95% ee was measured by HPLC using a chiral stationary phase [Daicel IG, *n*-hexane:*i*-PrOH=70:30, 1.0 mL/min),  $t_R$  = 10.015 min (major),  $t_R$  = 15.115 min (minor)],  $[\alpha]_D^{30}$  = -29.4 ( $c$  = 0.66, CHCl<sub>3</sub>). **<sup>1</sup>H NMR** (400 MHz, Chloroform-*d*)  $\delta$  8.54 (d,  $J$  = 83.6 Hz, 1H), 7.88 (s, 1H), 7.67 (d,  $J$  = 7.3 Hz, 1H), 7.50 (d,  $J$  = 7.4 Hz, 1H), 7.41 – 7.30 (m, 3H), 7.28 (dd,  $J$  = 5.1, 3.0 Hz, 1H), 7.09 (s, 1H), 6.81 (d,  $J$  = 7.3 Hz, 1H), 6.13 (s, 1H), 4.22 – 4.10 (m, 2H), 3.70 (s, 3H), 1.46 (s, 9H), 1.10 (t,  $J$  = 7.1 Hz, 3H). **<sup>13</sup>C NMR** (101 MHz, Chloroform-*d*)  $\delta$  165.8, 164.4, 151.9, 137.5, 127.4, 127.1, 126.8, 126.5, 126.3, 125.6, 124.1, 123.7, 119.4, 113.8, 110.5, 101.6, 80.4, 60.1, 52.9, 28.4, 13.9. **HRMS (ESI-TOF)**  $m/z$ :  $[M+H]^+$  Calcd for C<sub>29</sub>H<sub>29</sub>N<sub>2</sub>O<sub>6</sub><sup>+</sup> 533.1741; Found: 533.1740

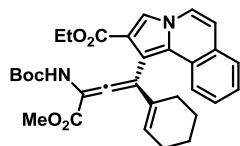

The compound **3n** was prepared according to the general procedure. The product was obtained as a yellow solid (32.3 mg, 61% yield). Melting point 68.6-70.1 °C. The 93% ee was measured by HPLC using a chiral stationary phase [Daicel IG, *n*-hexane:*i*-PrOH=70:30, 1.0 mL/min),  $t_R$  = 9.192 min (major),  $t_R$  = 14.543 min (minor)],  $[\alpha]_D^{30}$  = -29.8 ( $c$  = 0.65, CHCl<sub>3</sub>). **<sup>1</sup>H NMR** (400 MHz, Chloroform-*d*)  $\delta$  8.59 (d,  $J$  = 7.9 Hz, 0.5H), 8.29 (d,  $J$  = 8.1 Hz, 0.5H), 7.83 (s, 1H), 7.66 – 7.60 (m, 1H), 7.53 – 7.41 (m, 2H), 7.34 (d,  $J$  = 6.7 Hz, 1H), 6.77 (d,  $J$  = 7.3 Hz, 1H), 6.00 (s, 1H), 5.59 (s, 1H), 4.44 – 4.15 (m, 2H), 3.76 – 3.60 (m, 3H), 2.78 – 2.23 (m, 2H), 2.01 (s, 2H), 1.77 (q,  $J$  = 6.0, 5.5 Hz, 2H), 1.61 (dt,  $J$  = 7.4, 4.0 Hz, 2H), 1.44 (s, 9H), 1.33 (dd,  $J$  = 9.3, 5.0 Hz, 3H). **<sup>13</sup>C NMR** (101 MHz, Chloroform-*d*)  $\delta$  166.1, 164.8, 164.4, 152.3, 152.1, 132.6, 131.9, 128.7, 128.4, 128.3, 127.7, 127.4, 127.1, 126.8, 126.6, 126.4, 126.3, 125.5, 124.7, 124.3, 124.0, 119.6, 119.3, 118.6, 113.7, 113.5, 110.5, 110.1, 102.1, 101.8, 80.1, 60.2, 60.0, 52.9, 52.6, 36.7, 28.5, 28.4, 26.8, 26.1, 22.9, 22.3, 14.3, 14.2. **HRMS (ESI-TOF)**  $m/z$ : [M+H]<sup>+</sup> Calcd for C<sub>31</sub>H<sub>35</sub>N<sub>2</sub>O<sub>6</sub><sup>+</sup> 531.2490; Found: 531.2493.

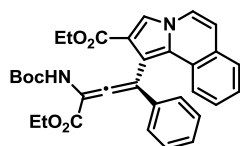

The compound **3o** was prepared according to the general procedure. The product was obtained as a yellow solid (14.6 mg, 27% yield). Melting point 75.6-77.9 °C. The 76% ee was measured by HPLC using a chiral stationary phase [Daicel IG, *n*-hexane:*i*-PrOH=70:30, 1.0 mL/min),  $t_R$  = 10.222 min (major),  $t_R$  = 12.555 min (minor)],  $[\alpha]_D^{30}$  = -66.9 ( $c$  = 0.29, CHCl<sub>3</sub>). **<sup>1</sup>H NMR** (500 MHz, Chloroform-*d*)  $\delta$  8.39 (s, 1H), 7.90 (s, 1H), 7.68 (d,  $J$  = 7.3 Hz, 1H), 7.52 – 7.47 (m, 3H), 7.35 – 7.27 (m, 4H), 7.25 – 7.20 (m, 1H), 6.81 (d,  $J$  = 7.4 Hz, 1H), 6.14 (s, 1H), 4.22 – 4.13 (m, 4H), 1.45 (s, 3H), 1.44 (s, 9H), 1.02 (t,  $J$  = 7.1 Hz, 3H). **<sup>13</sup>C NMR** (126 MHz, Chloroform-*d*)  $\delta$  165.3, 164.4, 156.4, 152.1, 135.5, 128.5, 127.9, 127.7, 127.5, 126.8, 126.44, 126.36, 125.0, 124.2, 119.6, 113.8, 110.2, 102.9, 80.4, 62.0, 60.1, 28.4, 14.4, 13.9. **HRMS (ESI-TOF)**  $m/z$ : [M+H]<sup>+</sup> Calcd for C<sub>32</sub>H<sub>33</sub>N<sub>2</sub>O<sub>6</sub><sup>+</sup> 540.2333; Found: 540.2333.

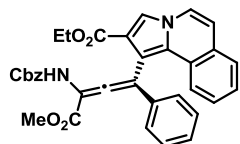

The compound **3p** was prepared according to the general procedure. The product was obtained as a yellow solid (36.4 mg, 65% yield). Melting point 160.2-162.3 °C. The 97% ee was measured by HPLC using a chiral stationary phase [Daicel IG, *n*-hexane:*i*-PrOH=70:30, 1.0 mL/min),  $t_R$  = 21.207 min (major),  $t_R$  = 31.392 min (minor)],  $[\alpha]_D^{30}$  = -25.8 ( $c$  = 0.68, CHCl<sub>3</sub>). **<sup>1</sup>H NMR** (400 MHz, Chloroform-*d*)  $\delta$  8.47 (s, 1H), 7.92 (s, 1H), 7.68 (d,  $J$  = 7.3 Hz, 1H), 7.52 (t,  $J$  = 6.3 Hz, 3H), 7.42 – 7.21 (m, 10H), 6.83 (d,  $J$  = 7.3 Hz, 1H), 6.40 (s, 1H), 5.22 – 5.11 (m, 2H), 4.18 (s, 2H), 3.71 (s, 3H), 1.05 (t,  $J$  = 7.1 Hz, 3H). **<sup>13</sup>C NMR** (101 MHz, Chloroform-*d*)  $\delta$  165.5, 164.2, 152.8, 136.2, 135.0, 128.54, 128.51, 128.2, 128.0, 127.6, 127.4, 126.8, 126.5, 126.1, 124.8, 124.1, 119.6, 118.9, 113.8, 109.7, 102.2, 67.2, 60.1, 52.9, 13.9. **HRMS (ESI-TOF)**  $m/z$ : [M+H]<sup>+</sup> Calcd for C<sub>34</sub>H<sub>29</sub>N<sub>2</sub>O<sub>6</sub><sup>+</sup> 561.2020; Found: 561.2021

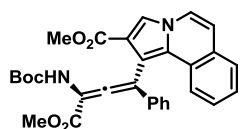

The compound **3q** was prepared according to the general procedure. The product was obtained as a yellow solid (35.8 mg, 70% yield). Melting point 169.9-172.3 °C. The 92% ee was measured by HPLC using a chiral stationary phase [Daicel IG, *n*-hexane:*i*-PrOH=70:30, 1.0 mL/min),  $t_R$  = 8.855 min (major),  $t_R$  = 12.080 min (minor)],  $[\alpha]_D^{30}$  = -26.9 ( $c$  = 0.72, CHCl<sub>3</sub>). **<sup>1</sup>H NMR** (400 MHz, Chloroform-*d*)  $\delta$  8.46 (s, 1H), 7.89 (s, 1H), 7.67 (d,  $J$  = 7.3 Hz, 1H), 7.51 (d,  $J$  = 7.4 Hz, 3H), 7.32 (q,  $J$  = 7.6, 6.5 Hz, 4H), 7.26 – 7.22 (m, 1H), 6.81 (d,  $J$  = 7.4 Hz, 1H), 6.14 (s, 1H), 3.73 (s, 6H), 1.45 (s, 9H). **<sup>13</sup>C NMR** (101 MHz, Chloroform-*d*)  $\delta$  165.9, 164.7, 151.8, 135.5, 128.6, 128.1, 127.9, 127.6, 127.4, 126.8, 126.5,

126.3, 124.2, 119.5, 113.9, 113.4, 110.4, 102.5, 80.4, 52.9, 51.4, 28.4. **HRMS (ESI-TOF)**  $m/z$  :  $[M+H]^+$  Calcd for  $C_{30}H_{29}N_2O_6^+$  513.2020; Found: 513.2023.

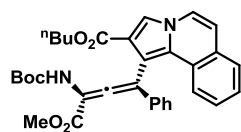

The compound **3r** was prepared according to the general procedure. The product was obtained as a yellow solid (29.6 mg, 53% yield). Melting point 66.0-68.4 °C. The 93% ee was measured by HPLC using a chiral stationary phase [Daicel IG, *n*-hexane:*i*-PrOH=70:30, 1.0 mL/min),  $t_R$  =8.522 min (major),  $t_R$ =10.482 min (minor)],  $[\alpha]_D^{30}$  = -32.9 ( $c$  = 0.59,  $CHCl_3$ ).  **$^1H$  NMR** (500 MHz, Chloroform-*d*)  $\delta$  8.47 (d,  $J$  = 111.7 Hz, 1H), 7.90 (d,  $J$  = 1.9 Hz, 1H), 7.68 (d,  $J$  = 7.3 Hz, 1H), 7.55 – 7.43 (m, 3H), 7.30 (q,  $J$  = 7.6, 6.8 Hz, 4H), 7.27 – 7.20 (m, 1H), 6.81 (d,  $J$  = 7.3 Hz, 1H), 6.11 (s, 1H), 4.36 – 3.96 (m, 2H), 3.66 (s, 3H), 1.44 (s, 9H), 1.38 (p,  $J$  = 7.0 Hz, 2H), 1.09 (s, 2H), 0.76 (t,  $J$  = 7.4 Hz, 3H).  **$^{13}C$  NMR** (126 MHz, Chloroform-*d*)  $\delta$  165.9, 164.7, 151.9, 135.3, 128.5, 127.9, 127.7, 127.4, 126.8, 126.4, 126.3, 124.2, 119.6, 113.8, 109.8, 102.6, 80.4, 64.3, 52.9, 30.6, 28.4, 19.2, 13.9. **HRMS (ESI-TOF)**  $m/z$ :  $[M+H]^+$  Calcd for  $C_{33}H_{35}N_2O_6^+$  555.2490; Found: 555.2490.

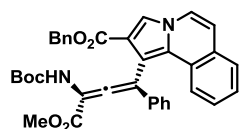

The compound **3s** was prepared according to the general procedure. The product was obtained as a yellow solid (17.1 mg, 29% yield). Melting point 93.8-95.4 °C. The 89% ee was measured by HPLC using a chiral stationary phase [Daicel IG, *n*-hexane:*i*-PrOH=70:30, 1.0 mL/min),  $t_R$  =12.775 min (major),  $t_R$ =14.950 min (minor)],  $[\alpha]_D^{30}$  = -57.1 ( $c$  = 0.34,  $CHCl_3$ ).  **$^1H$  NMR** (500 MHz, Chloroform-*d*)  $\delta$  8.48 (d,  $J$  = 139.6 Hz, 1H), 7.92 (s, 1H), 7.67 (d,  $J$  = 7.4 Hz, 1H), 7.57 – 7.39 (m, 3H), 7.32 (d,  $J$  = 6.8 Hz, 2H), 7.29 – 7.15 (m, 6H), 7.11 (s, 2H), 6.82 (d,  $J$  = 7.4 Hz, 1H), 6.11 (s, 1H), 5.46 – 5.02 (m, 2H), 3.61 (s, 3H), 1.43 (s, 9H).  **$^{13}C$  NMR** (126 MHz, Chloroform-*d*)  $\delta$  165.9, 164.0, 151.7, 135.2, 128.6, 128.4, 128.0, 127.7, 127.5, 126.8, 126.5, 126.3, 124.2, 119.9, 113.9, 80.5, 65.9, 52.9, 28.4. **HRMS (ESI-TOF)**  $m/z$ :  $[M+H]^+$  Calcd for  $C_{36}H_{33}N_2O_6^+$  589.2333; Found: 589.2335.

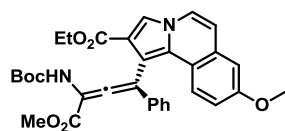

The compound **3t** was prepared according to the general procedure. The product was obtained as a yellow solid (42.0 mg, 76% yield). Melting point 107.4-109.6 °C. The 90% ee was measured by HPLC using a chiral stationary phase [Daicel IG, *n*-hexane:*i*-PrOH=70:30, 1.0 mL/min),  $t_R$  =11.998 min (major),  $t_R$ =15.532 min (minor)],  $[\alpha]_D^{30}$  = -30.3 ( $c$  = 0.64,  $CHCl_3$ ).  **$^1H$  NMR** (400 MHz, Chloroform-*d*)  $\delta$  8.41 (s, 1H), 7.85 (s, 1H), 7.66 (d,  $J$  = 7.4 Hz, 1H), 7.49 (d,  $J$  = 7.6 Hz, 2H), 7.38 – 7.27 (m, 2H), 7.25 – 7.19 (m, 1H), 7.01 – 6.92 (m, 2H), 6.75 (d,  $J$  = 7.4 Hz, 1H), 6.12 (s, 1H), 4.26 – 4.06 (m, 2H), 3.82 (s, 3H), 3.70 (s, 3H), 1.45 (s, 9H), 1.01 (t,  $J$  = 7.1 Hz, 3H).  **$^{13}C$  NMR** (101 MHz, Chloroform-*d*)  $\delta$  165.9, 164.6, 158.2, 151.9, 135.6, 129.3, 128.5, 127.9, 127.7, 124.7, 120.2, 119.0, 116.4, 113.5, 109.2, 108.3, 102.4, 80.4, 60.1, 55.4, 52.9, 28.4, 13.8. **HRMS (ESI-TOF)**  $m/z$ :  $[M+H]^+$  Calcd for  $C_{32}H_{33}N_2O_7^+$  557.2283; Found: 557.2282.

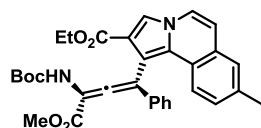

The compound **3u** was prepared according to the general procedure. The product was obtained as a yellow solid (37.8 mg, 70% yield). Melting point 78.4-80.1 °C. The 93% ee was measured by HPLC using a chiral stationary phase [Daicel IA, *n*-hexane:*i*-PrOH=80:20, 1.0 mL/min),  $t_R$  =7.430 min (minor),  $t_R$ =8.506 min (major)],  $[\alpha]_D^{30}$  = -25.5 ( $c$  = 0.76,  $CHCl_3$ ).  **$^1H$  NMR** (400 MHz, Chloroform-*d*)  $\delta$  8.31 (s, 1H), 7.87 (s, 1H), 7.65 (d,  $J$  = 7.3 Hz, 1H), 7.50 (d,  $J$  = 7.6 Hz, 2H), 7.35 – 7.27 (m, 3H), 7.25 – 7.11 (m, 2H), 6.75 (d,  $J$  = 7.4 Hz, 1H), 6.11 (s, 1H), 4.19 (q,  $J$  = 9.5, 8.7 Hz, 2H), 3.70 (s, 3H), 2.38 (s, 3H), 1.45 (s, 9H), 1.02 (t,  $J$  = 7.1 Hz, 3H).  **$^{13}C$  NMR** (101 MHz, Chloroform-*d*)  $\delta$  165.9, 164.5,

152.0, 136.2, 135.5, 128.5, 127.84, 127.79, 127.7, 127.6, 126.8, 124.2, 123.9, 119.3, 113.7, 109.3, 102.4, 80.4, 60.1, 52.9, 28.4, 21.4, 13.8. **HRMS (ESI-TOF)**  $m/z$ :  $[M+H]^+$  Calcd for  $C_{32}H_{33}N_2O_6^+$  541.2333; Found: 541.2336.

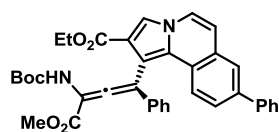

The compound **3v** was prepared according to the general procedure. The product was obtained as a yellow solid (30.1 mg, 50% yield). Melting point 106.9-108.8 °C. The 91% ee was measured by HPLC using a chiral stationary phase [Daicel IG, *n*-hexane:*i*-PrOH=80:20, 1.0 mL/min],  $t_R$  =16.220 min (minor),  $t_R$  =18.492 min (major)],  $[\alpha]_D^{30}$  = +32.3 ( $c$  = 0.60,  $CHCl_3$ ).  **$^1H$  NMR** (400 MHz, Chloroform-*d*)  $\delta$  8.56 (d,  $J$  = 81.3 Hz, 1H), 7.92 (s, 1H), 7.71 (d,  $J$  = 7.5 Hz, 2H), 7.60 (d,  $J$  = 7.7 Hz, 3H), 7.53 (d,  $J$  = 7.6 Hz, 2H), 7.44 (t,  $J$  = 7.5 Hz, 2H), 7.38 – 7.28 (m, 3H), 7.27 – 7.23 (m, 1H), 6.88 (d,  $J$  = 7.3 Hz, 1H), 6.15 (s, 1H), 4.26 – 4.11 (m, 2H), 3.71 (s, 3H), 1.45 (s, 9H), 1.03 (t,  $J$  = 7.1 Hz, 3H).  **$^{13}C$  NMR** (101 MHz, Chloroform-*d*)  $\delta$  165.9, 164.7, 152.0, 140.6, 139.1, 135.5, 133.4, 129.0, 128.5, 127.9, 127.7, 127.5, 127.4, 127.1, 125.4, 125.0, 124.6, 119.7, 114.0, 110.4, 102.5, 80.4, 60.2, 52.9, 28.4, 13.8. **HRMS (ESI-TOF)**  $m/z$ :  $[M+H]^+$  Calcd for  $C_{37}H_{35}N_2O_6^+$  603.2490; Found: 603.2492.

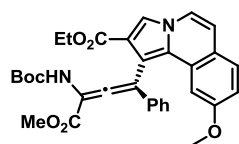

The compound **3w** was prepared according to the general procedure. The product was obtained as a yellow solid (32.8 mg, 59% yield). Melting point 105.6-108.3 °C. The 95% ee was measured by HPLC using a chiral stationary phase [Daicel IG, *n*-hexane:*i*-PrOH=70:30, 1.0 mL/min],  $t_R$  =8.025 min (major),  $t_R$  =14.753 min (minor)],  $[\alpha]_D^{30}$  = -29.4 ( $c$  = 0.66,  $CHCl_3$ ).  **$^1H$  NMR** (500 MHz, Acetone-*d*<sub>6</sub>)  $\delta$  8.12 (s, 1H), 8.00 (d,  $J$  = 7.3 Hz, 1H), 7.79 (s, 1H), 7.55 (d,  $J$  = 23.3 Hz, 3H), 7.38 – 7.31 (m, 2H), 7.31 – 7.25 (m, 1H), 6.95 (d,  $J$  = 7.2 Hz, 3H), 4.17 (q,  $J$  = 7.1 Hz, 2H), 3.67 (d,  $J$  = 83.0 Hz, 6H), 1.52 – 1.26 (m, 9H), 1.10 (t,  $J$  = 7.2 Hz, 3H).  **$^{13}C$  NMR** (126 MHz, Acetone-*d*<sub>6</sub>)  $\delta$  165.7, 164.5, 160.0, 153.6, 129.2, 128.8, 128.3, 128.0, 123.5, 122.4, 120.6, 117.0, 116.0, 114.0, 107.8, 80.3, 60.3, 55.5, 52.6, 28.4, 14.3. **HRMS (ESI-TOF)**  $m/z$ :  $[M+H]^+$  Calcd for  $C_{32}H_{33}N_2O_7^+$  557.2283; Found: 557.2283.

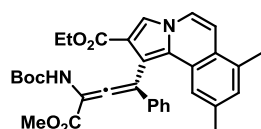

The compound **3x** was prepared according to the general procedure. The product was obtained as a yellow solid (31.6 mg, 57% yield). Melting point 76.8-78.9 °C. The 87% ee was measured by HPLC using a chiral stationary phase [Daicel IG, *n*-hexane:*i*-PrOH=70:30, 1.0 mL/min],  $t_R$  =11.217 min (major),  $t_R$  =15.553 min (minor)],  $[\alpha]_D^{30}$  = -30.8 ( $c$  = 0.63,  $CHCl_3$ ).  **$^1H$  NMR** (400 MHz, Chloroform-*d*)  $\delta$  8.23 – 7.92 (m, 1H), 7.86 (s, 1H), 7.66 (d,  $J$  = 7.6 Hz, 1H), 7.51 (d,  $J$  = 7.7 Hz, 2H), 7.29 (t,  $J$  = 7.5 Hz, 2H), 7.22 (t,  $J$  = 7.3 Hz, 1H), 7.00 (s, 1H), 6.95 (d,  $J$  = 7.6 Hz, 1H), 6.14 (s, 1H), 4.21 (q,  $J$  = 7.4 Hz, 2H), 3.67 (s, 3H), 2.50 (s, 3H), 2.27 (d,  $J$  = 8.5 Hz, 3H), 1.42 (s, 9H), 1.08 (t,  $J$  = 7.1 Hz, 3H).  **$^{13}C$  NMR** (101 MHz, Chloroform-*d*)  $\delta$  165.9, 164.5, 151.8, 135.5, 133.3, 129.4, 128.4, 127.8, 127.7, 126.4, 124.0, 123.1, 119.1, 118.8, 113.5, 110.0, 102.4, 80.3, 60.1, 52.8, 28.3, 21.8, 19.6, 13.9. **HRMS (ESI-TOF)**  $m/z$ :  $[M+H]^+$  Calcd for  $C_{33}H_{35}N_2O_6^+$  555.2490; Found: 555.2490.

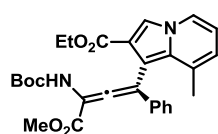

The compound **3y** was prepared according to the general procedure. The product was obtained as a yellow solid (21.1 mg, 43% yield). Melting point 59.7-61.9 °C. The 90% ee was measured by HPLC using a chiral stationary phase [Daicel IG, *n*-hexane:*i*-PrOH=70:30, 1.0 mL/min],  $t_R$  =11.230 min (major),  $t_R$  =20.498 min (minor)],  $[\alpha]_D^{30}$  = -46.2 ( $c$  = 0.42,  $CHCl_3$ ).  **$^1H$  NMR** (400 MHz, Chloroform-*d*)  $\delta$  7.89 (s, 1H), 7.75 (d,  $J$  = 6.8 Hz, 1H), 7.40 (d,  $J$  = 7.7 Hz, 2H), 7.29 (t,  $J$  = 7.6 Hz, 2H), 7.24 – 7.18 (m, 1H), 6.46 (dt,  $J$  = 12.8, 6.7 Hz, 2H), 6.09 (s, 1H), 4.23 – 3.99 (m, 2H), 3.76 (s, 3H), 2.36 (s, 3H), 1.42 (s, 9H), 1.00 (t,  $J$  =

7.2 Hz, 3H). **<sup>13</sup>C NMR** (101 MHz, Chloroform-*d*)  $\delta$  165.8, 164.6, 152.4, 137.2, 131.6, 131.2, 128.4, 128.3, 127.74, 127.65, 126.9, 123.6, 119.9, 118.9, 117.2, 112.6, 106.8, 102.1, 80.5, 60.1, 52.8, 28.3, 13.8. **HRMS (ESI-TOF)** *m/z*: [M+H]<sup>+</sup> Calcd for C<sub>28</sub>H<sub>31</sub>N<sub>2</sub>O<sub>6</sub><sup>+</sup> 491.2177; Found: 491.2174.

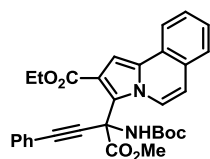

The compound **4a** was prepared according to the general procedure. The product was obtained as a yellow solid. Melting point 73.8-75.8 °C. **<sup>1</sup>H NMR** (500 MHz, Chloroform-*d*)  $\delta$  9.40 (d, *J* = 7.9 Hz, 1H), 8.07 (d, *J* = 8.0 Hz, 1H), 7.57 (d, *J* = 7.7 Hz, 1H), 7.53 – 7.46 (m, 5H), 7.40 (t, *J* = 7.5 Hz, 1H), 7.37 – 7.28 (m, 3H), 6.90 (d, *J* = 7.9 Hz, 1H), 4.42 – 4.30 (m, 2H), 3.80 (d, *J* = 1.2 Hz, 3H), 1.43 (td, *J* = 7.1, 1.1 Hz, 3H), 1.39 (s, 9H). **<sup>13</sup>C NMR** (126 MHz, Chloroform-*d*)  $\delta$  168.4, 165.8, 154.5, 132.0, 130.3, 129.1, 128.5, 127.7, 126.8, 126.7, 126.1, 122.3, 122.1, 116.3, 112.5, 102.9, 87.0, 85.4, 80.3, 60.9, 56.7, 54.2, 28.4, 14.5. **HRMS (ESI-TOF)** *m/z*: [M+H]<sup>+</sup> Calcd for C<sub>31</sub>H<sub>31</sub>N<sub>2</sub>O<sub>6</sub><sup>+</sup> 527.2177; Found: 527.2168.

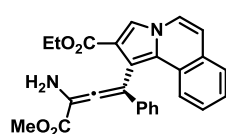

The compound **5** was prepared according to the general procedure. The product was obtained as reddish brown oil (19.2 mg, 90% yield). Melting point 129.3-130.8 °C. The 0% ee was measured by HPLC using a chiral stationary phase [Daicel IG, *n*-hexane:*i*-PrOH=70:30, 1.0 mL/min], *t<sub>R</sub>* = 11.510 min, *t<sub>R</sub>* = 18.767 min]. **<sup>1</sup>H NMR** (400 MHz, Chloroform-*d*)  $\delta$  7.95 (s, 1H), 7.90 (d, *J* = 8.1 Hz, 1H), 7.72 (d, *J* = 7.4 Hz, 1H), 7.64 – 7.57 (m, 2H), 7.56 – 7.48 (m, 2H), 7.43 – 7.21 (m, 4H), 6.86 (d, *J* = 7.3 Hz, 1H), 4.15 (q, *J* = 7.1 Hz, 2H), 3.44 (s, 3H), 1.17 (t, *J* = 7.1 Hz, 3H). **<sup>13</sup>C NMR** (101 MHz, Chloroform-*d*)  $\delta$  184.0, 163.8, 163.4, 155.5, 138.8, 130.7, 128.9, 128.3, 128.1, 127.9, 127.5, 127.4, 126.9, 126.1, 124.1, 123.1, 122.9, 120.1, 118.6, 114.2, 113.2, 60.2, 52.3, 14.2. **HRMS (APCI-TOF)** *m/z*: [M+Na]<sup>+</sup> Calcd for C<sub>26</sub>H<sub>22</sub>N<sub>2</sub>NaO<sub>4</sub><sup>+</sup> 449.1472; Found: 449.1471.

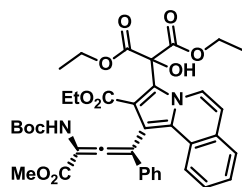

The compound **6** was prepared according to the general procedure. The product was obtained as a yellow solid (94.7 mg, 68% yield). Melting point 82.4-84.2 °C. The 88% ee was measured by HPLC using a chiral stationary phase [Daicel AD-H, *n*-hexane:*i*-PrOH=80:20, 1.0 mL/min], *t<sub>R</sub>* = 13.560 min (minor), *t<sub>R</sub>* = 22.088 min (major), [ $\alpha$ ]<sub>D</sub><sup>30</sup> = 27.7 (c = 0.70, CHCl<sub>3</sub>). **<sup>1</sup>H NMR** (500 MHz, Acetone-*d*<sub>6</sub>)  $\delta$  8.51 (s, 1H), 8.03 (d, *J* = 7.7 Hz, 1H), 7.69 – 7.62 (m, 1H), 7.53 (d, *J* = 7.7 Hz, 2H), 7.43 – 7.31 (m, 4H), 7.30 – 7.25 (m, 1H), 7.07 (d, *J* = 7.6 Hz, 1H), 6.92 (s, 1H), 6.28 (s, 1H), 4.41 – 3.97 (m, 6H), 3.68 (s, 3H), 1.43 (s, 9H), 1.23 (t, *J* = 7.1 Hz, 6H), 0.86 (q, *J* = 8.5, 7.4 Hz, 3H). **<sup>13</sup>C NMR** (126 MHz, Acetone-*d*<sub>6</sub>)  $\delta$  169.0, 165.7, 165.6, 153.1, 136.3, 132.0, 129.6, 129.1, 128.7, 128.52, 128.45, 127.7, 127.5, 126.4, 125.8, 124.5, 123.3, 121.4, 113.5, 109.9, 103.7, 80.5, 78.6, 63.4, 61.2, 53.1, 28.4, 14.1, 13.6. **HRMS (ESI-TOF)** *m/z*: [M+H]<sup>+</sup> Calcd for C<sub>38</sub>H<sub>41</sub>N<sub>2</sub>O<sub>11</sub><sup>+</sup> 701.2705; Found: 701.2711.

## 10. X-ray crystallographic analysis

Single crystals suitable for X-ray diffraction experiment were obtained by diffusion method of *n*-hexane/EtOAc containing the corresponding compounds **3p** and **4a**, respectively. The crystal was kept at 300 K during data collection. Data collection was performed at 300 K on Bruker D8 Venture diffractometer with a CCD area detector, using graphite monochromated Cu  $K\alpha$  radiation ( $\lambda = 1.54178$  Å). Refinements were performed on *F* anisotropically for all the non-hydrogen atoms by the full-matrix least-squares method using SHELXL program in OLEX2 software.

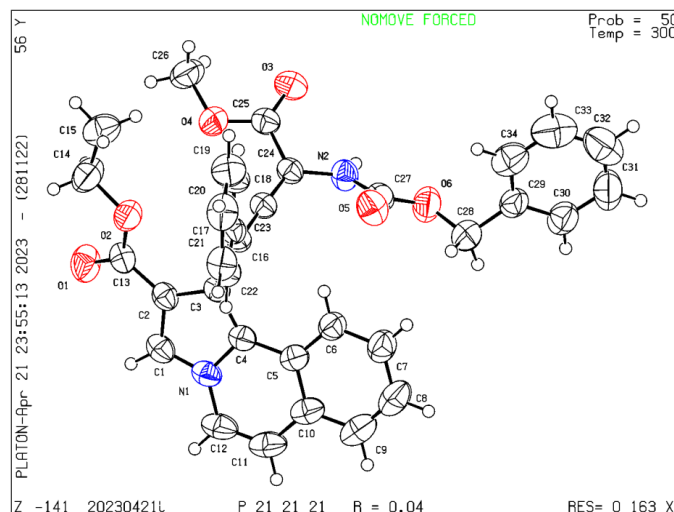

Figure S1. X-ray structure of **3p** at 50% probability level. Flack parameter = 0.13(7).

|                                                               |                                                  |                    |
|---------------------------------------------------------------|--------------------------------------------------|--------------------|
| Bond precision:                                               | C-C = 0.0043 Å                                   | Wavelength=1.54178 |
| Cell:                                                         | a=9.2858(6)      b=10.8685(7)      c=27.6229(17) |                    |
|                                                               | alpha=90      beta=90      gamma=90              |                    |
| Temperature:                                                  | 300 K                                            |                    |
|                                                               | Calculated                                       | Reported           |
| Volume                                                        | 2787.8(3)                                        | 2787.8(3)          |
| Space group                                                   | P 21 21 21                                       | P 21 21 21         |
| Hall group                                                    | P 2ac 2ab                                        | P 2ac 2ab          |
| Moiety formula                                                | C34 H28 N2 O6                                    | C34 H28 N2 O6      |
| Sum formula                                                   | C34 H28 N2 O6                                    | C34 H28 N2 O6      |
| Mr                                                            | 560.58                                           | 560.58             |
| Dx, g cm <sup>-3</sup>                                        | 1.336                                            | 1.336              |
| Z                                                             | 4                                                | 4                  |
| Mu (mm <sup>-1</sup> )                                        | 0.753                                            | 0.753              |
| F000                                                          | 1176.0                                           | 1176.0             |
| F000'                                                         | 1179.72                                          |                    |
| h,k,lmax                                                      | 11,13,34                                         | 11,13,34           |
| Nref                                                          | 5557[ 3160]                                      | 5556               |
| Tmin,Tmax                                                     | 0.893,0.914                                      | 0.436,0.754        |
| Tmin'                                                         | 0.893                                            |                    |
| Correction method= # Reported T Limits: Tmin=0.436 Tmax=0.754 |                                                  |                    |
| AbsCorr = MULTI-SCAN                                          |                                                  |                    |
| Data completeness= 1.76/1.00                                  | Theta(max)= 72.594                               |                    |
| R(reflections)= 0.0430( 5006)                                 | wR2(reflections)= 0.1124(5556)                   |                    |
| S = 1.058                                                     | Npar=382                                         |                    |

Single crystals suitable for X-ray diffraction experiment were obtained by diffusion method of *n*-hexane/Acetonitrile containing the corresponding compound **4a**. The crystal was kept at 300 K during data collection.

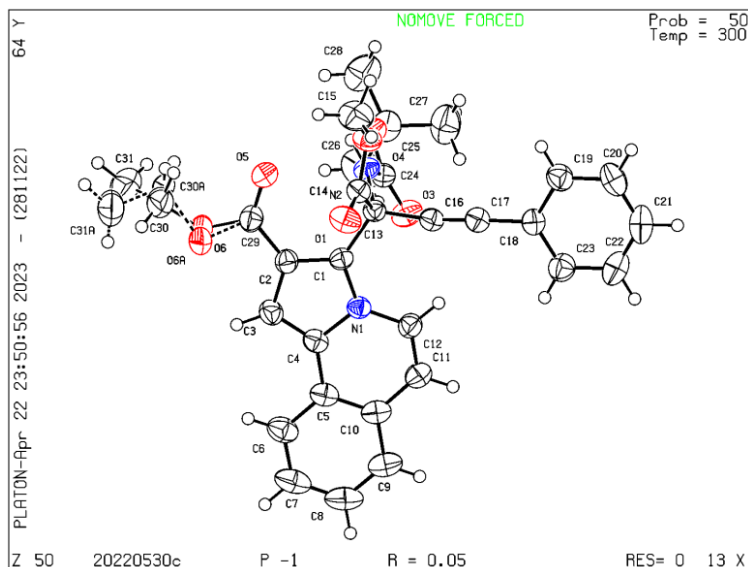

Figure S2. X-ray structure of **4a** (at 50% probability level).

|                                                               |                  |                |                                 |                    |  |
|---------------------------------------------------------------|------------------|----------------|---------------------------------|--------------------|--|
| Bond precision:                                               |                  | C-C = 0.0025 Å |                                 | Wavelength=0.71073 |  |
| Cell:                                                         | a=10.1018(8)     | b=11.4504(7)   | c=13.7104(12)                   |                    |  |
|                                                               | alpha=105.430(3) | beta=99.759(3) | gamma=108.874(4)                |                    |  |
| Temperature:                                                  | 300 K            |                |                                 |                    |  |
|                                                               | Calculated       |                |                                 | Reported           |  |
| Volume                                                        | 1388.58(19)      |                |                                 | 1388.58(19)        |  |
| Space group                                                   | P -1             |                |                                 | P -1               |  |
| Hall group                                                    | -P1              |                |                                 | -P 1               |  |
| Moiety formula                                                | C31 H30 N2 O6    |                |                                 | C31 H30 N2 O6      |  |
| Sum formula                                                   | C31 H30 N2 O6    |                |                                 | C31 H30 N2 O6      |  |
| Mr                                                            | 526.57           |                |                                 | 526.57             |  |
| Dx,g cm-3                                                     | 1.259            |                |                                 | 1.259              |  |
| Z                                                             | 2                |                |                                 | 2                  |  |
| Mu (mm-1)                                                     | 0.088            |                |                                 | 0.088              |  |
| F000                                                          | 556.0            |                |                                 | 0.088              |  |
| F000'                                                         | 556.27           |                |                                 |                    |  |
| h,k,lmax                                                      | 15,17,20         |                |                                 | 13,15,20           |  |
| Nref                                                          | 9737             |                |                                 | 7152               |  |
| Tmin,Tmax                                                     | 0.986,0.989      |                |                                 | 0.688,0.746        |  |
| Tmin'                                                         | 0.986            |                |                                 |                    |  |
| Correction method= # Reported T Limits: Tmin=0.688 Tmax=0.746 |                  |                |                                 |                    |  |
| AbsCorr = MULTI-SCAN                                          |                  |                |                                 |                    |  |
| Data completeness= 0.735                                      |                  |                | Theta(max)= 32.134              |                    |  |
| R(reflections)= 0.0490(4171)                                  |                  |                | wR2(reflections)= 0.1398( 7152) |                    |  |
| S = 1.022                                                     |                  | Npar= 386      |                                 |                    |  |

## 11. Copies of NMR spectra and HPLC measurements of the products

$^1\text{H}$  NMR of **3a** (400 MHz,  $\text{CDCl}_3$ )

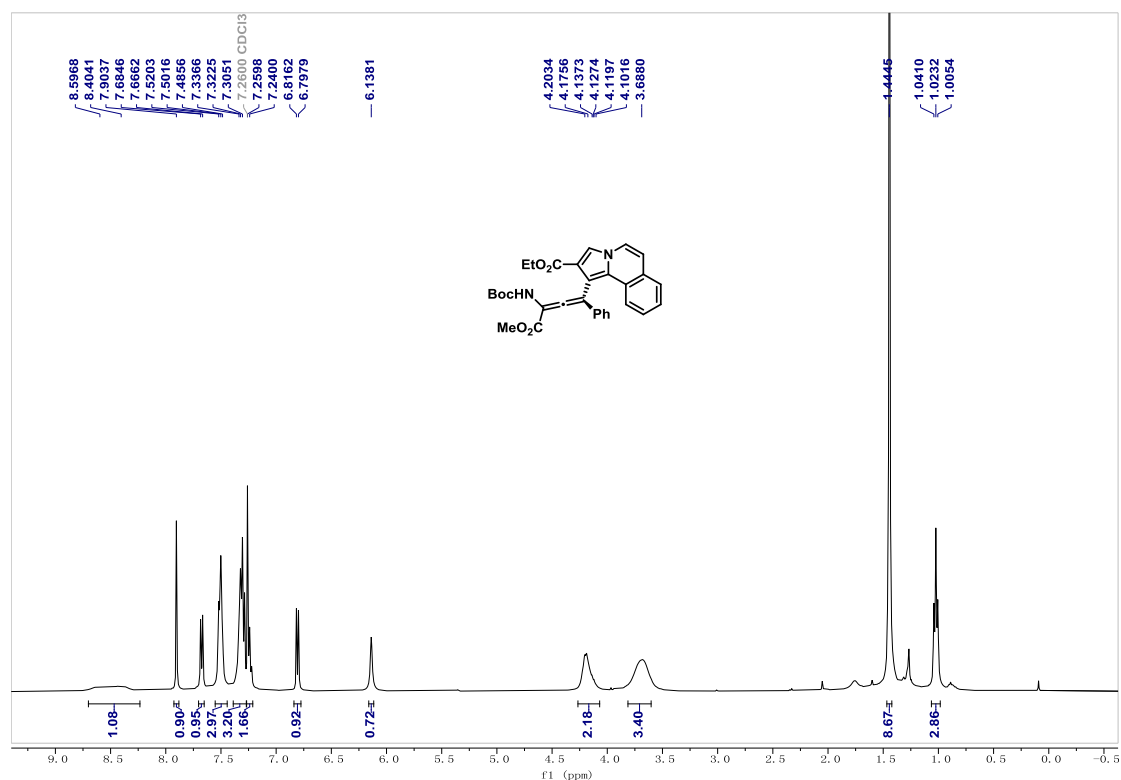

$^{13}\text{C}$  NMR of **3a** (101 MHz,  $\text{CDCl}_3$ )

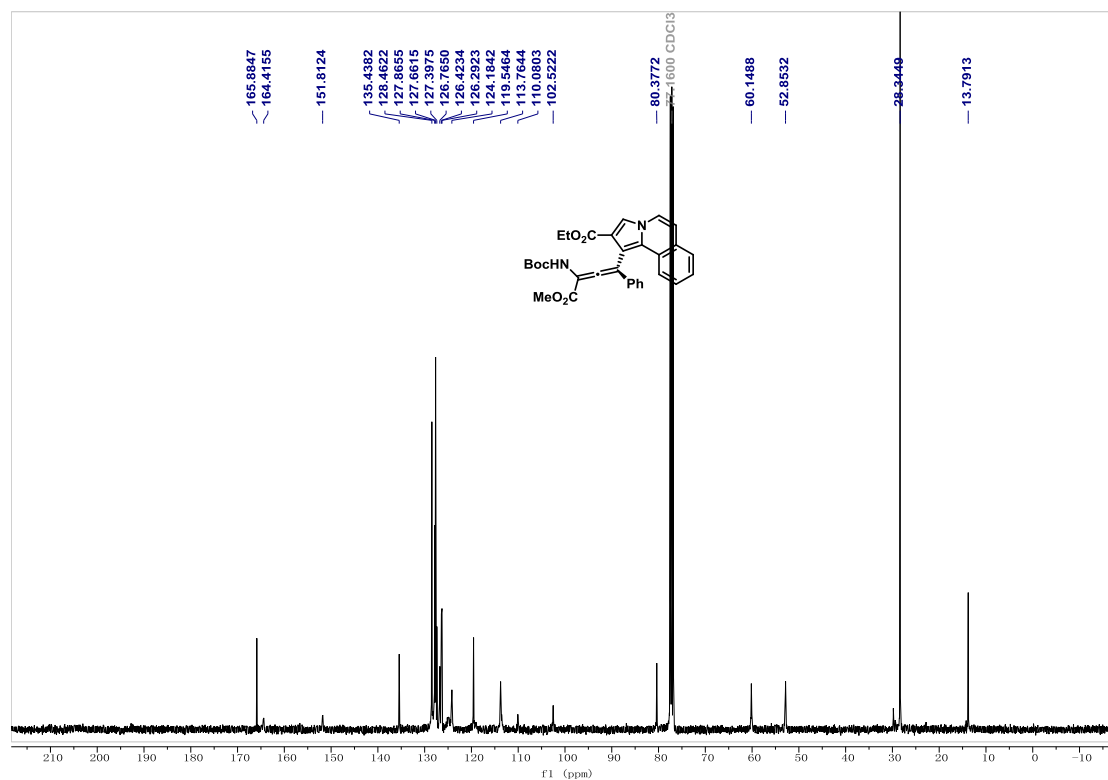

### HPLC analysis: rac-3a

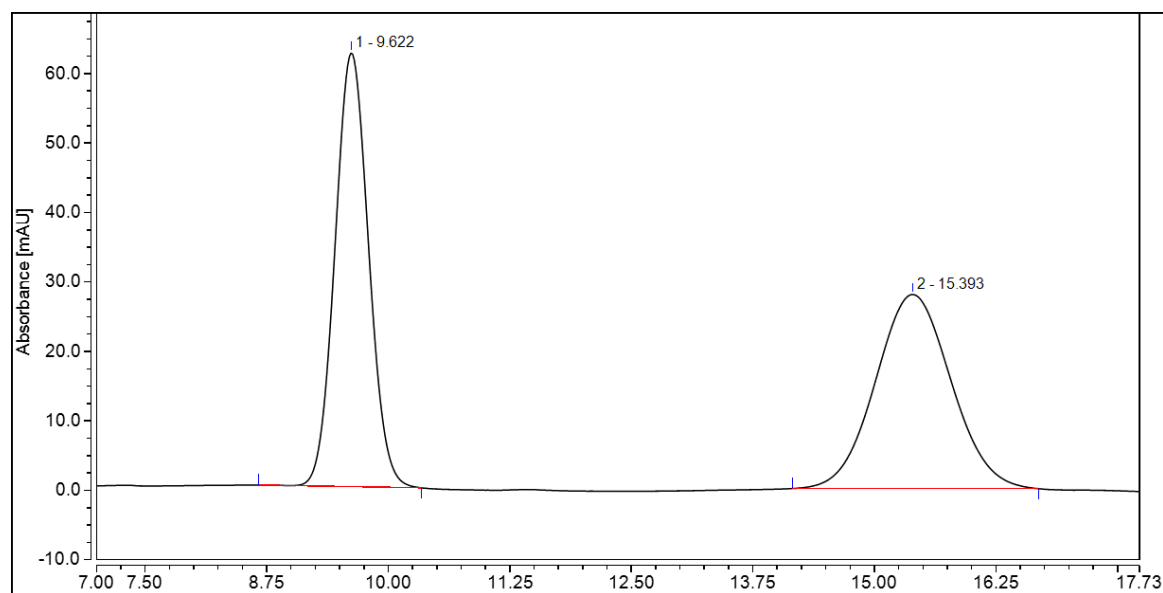

| Peak | RetTime<br>min | Area<br>mAU*min | Height<br>mAU | Area<br>% | Height<br>% |
|------|----------------|-----------------|---------------|-----------|-------------|
| 1    | 9.622          | 25.027          | 62.451        | 49.85     | 69.08       |
| 2    | 15.393         | 25.178          | 27.953        | 50.15     | 30.92       |

### Enantioenriched 3a

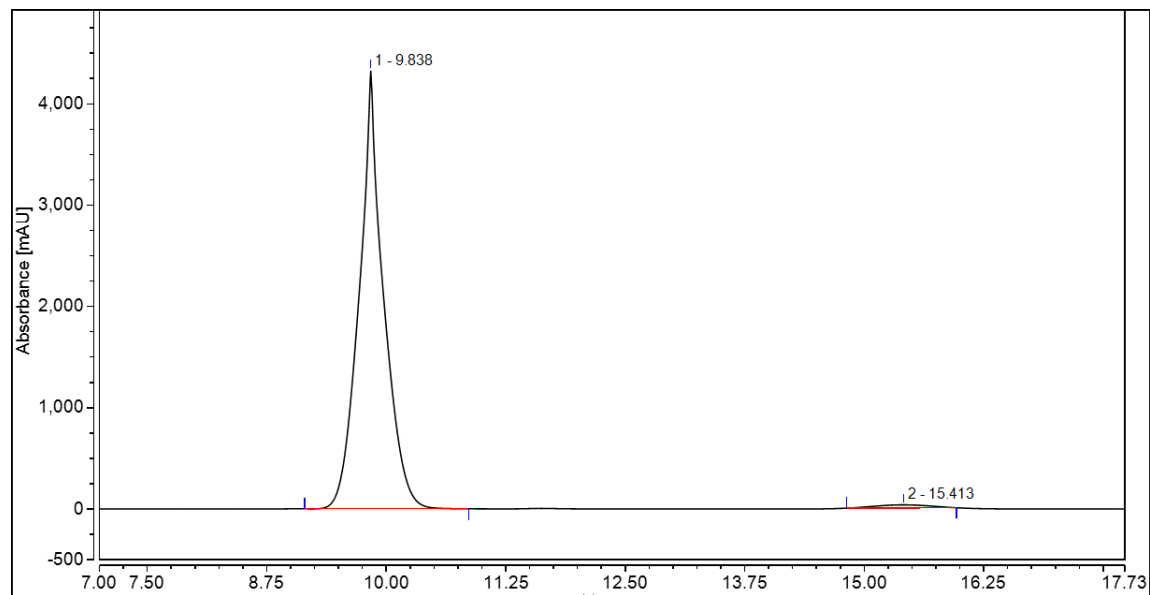

| Peak | RetTime<br>min | Area<br>mAU*min | Height<br>mAU | Area<br>% | Height<br>% |
|------|----------------|-----------------|---------------|-----------|-------------|
| 1    | 9.838          | 1270.847        | 4321.901      | 98.45     | 99.30       |
| 2    | 15.413         | 20.000          | 30.291        | 1.55      | 0.70        |

$^1\text{H}$  NMR of **3b** (400 MHz,  $\text{CDCl}_3$ )

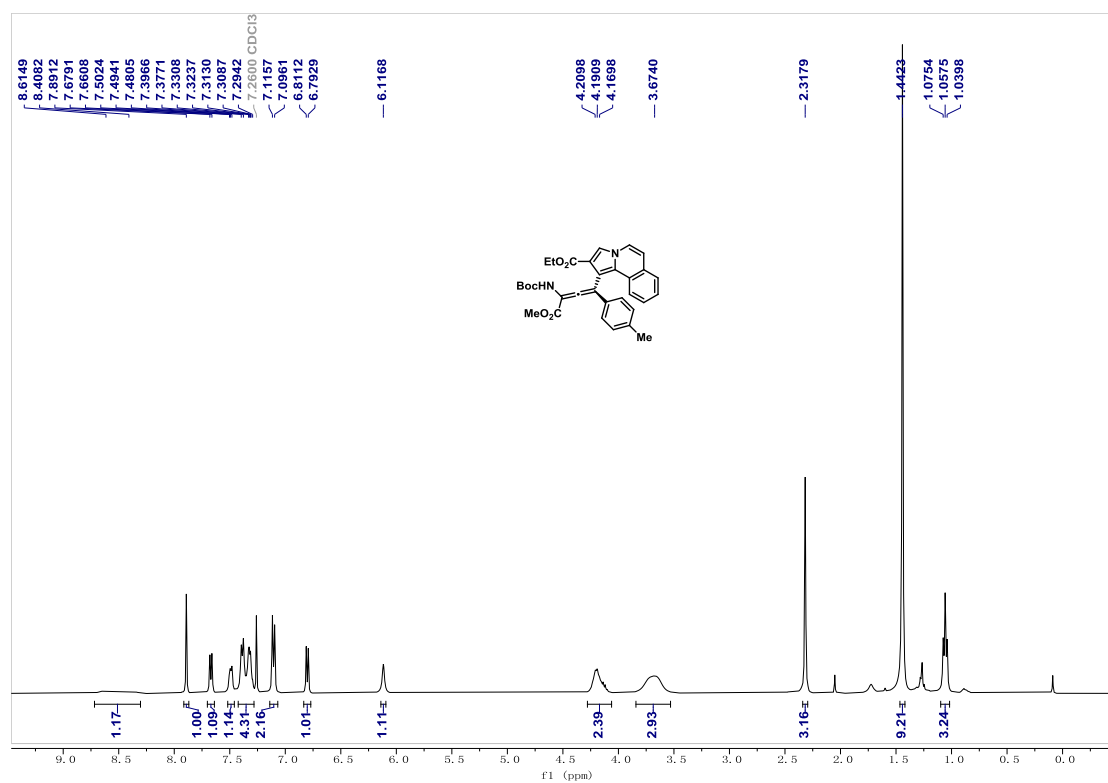

$^{13}\text{C}$  NMR of **3b** (101 MHz,  $\text{CDCl}_3$ )

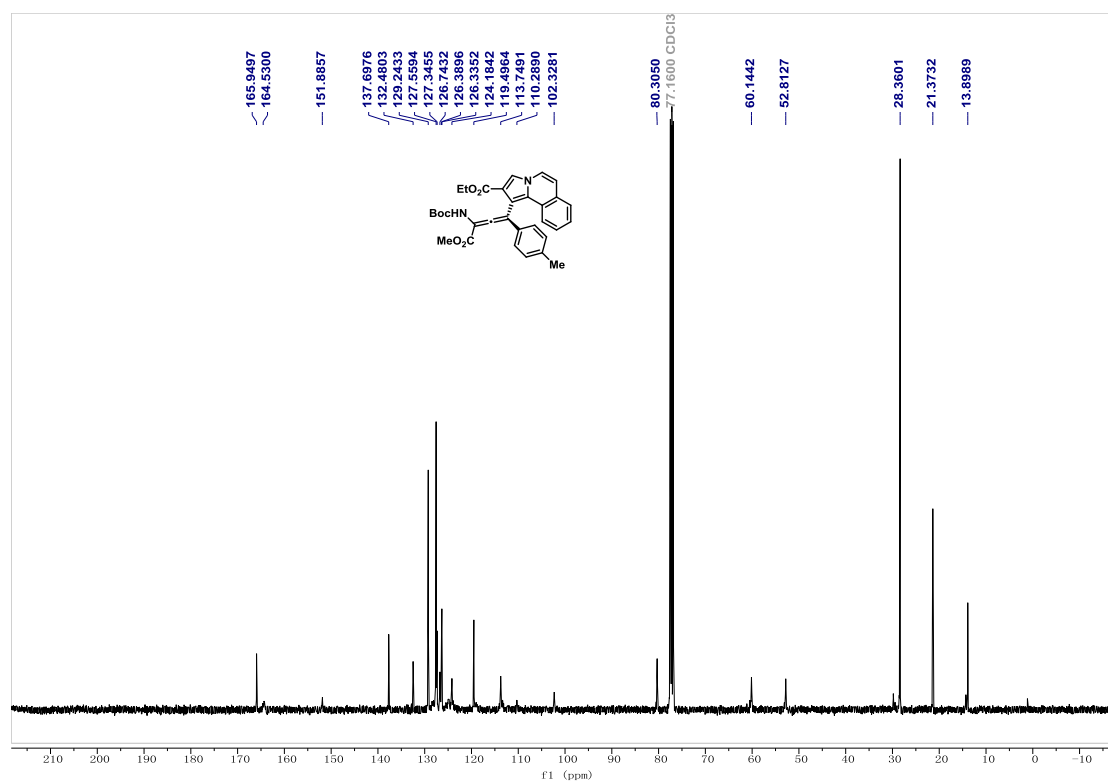

### HPLC analysis: rac-3b

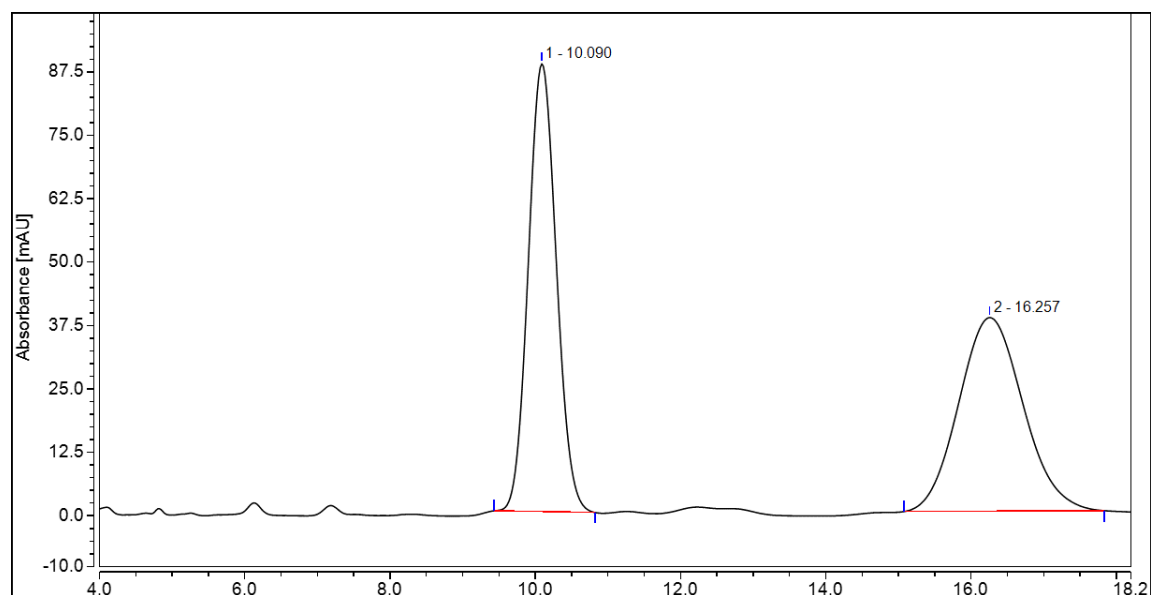

| Peak | RetTime<br>min | Area<br>mAU*min | Height<br>mAU | Area<br>% | Height<br>% |
|------|----------------|-----------------|---------------|-----------|-------------|
| 1    | 10.090         | 39.481          | 88.298        | 50.22     | 69.82       |
| 2    | 16.257         | 39.142          | 38.162        | 49.78     | 30.18       |

### Enantioenriched 3b

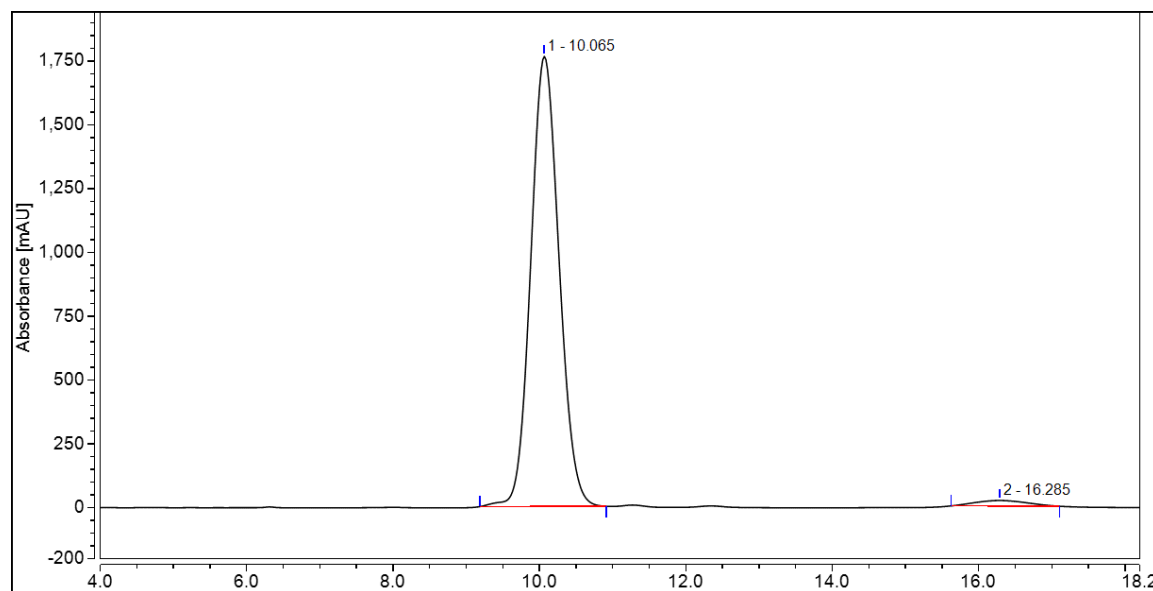

| Peak | RetTime<br>min | Area<br>mAU*min | Height<br>mAU | Area<br>% | Height<br>% |
|------|----------------|-----------------|---------------|-----------|-------------|
| 1    | 10.065         | 790.652         | 1763.457      | 97.80     | 98.79       |
| 2    | 16.285         | 17.757          | 21.613        | 2.20      | 1.21        |

<sup>1</sup>H NMR of **3c** (400 MHz, CDCl<sub>3</sub>)

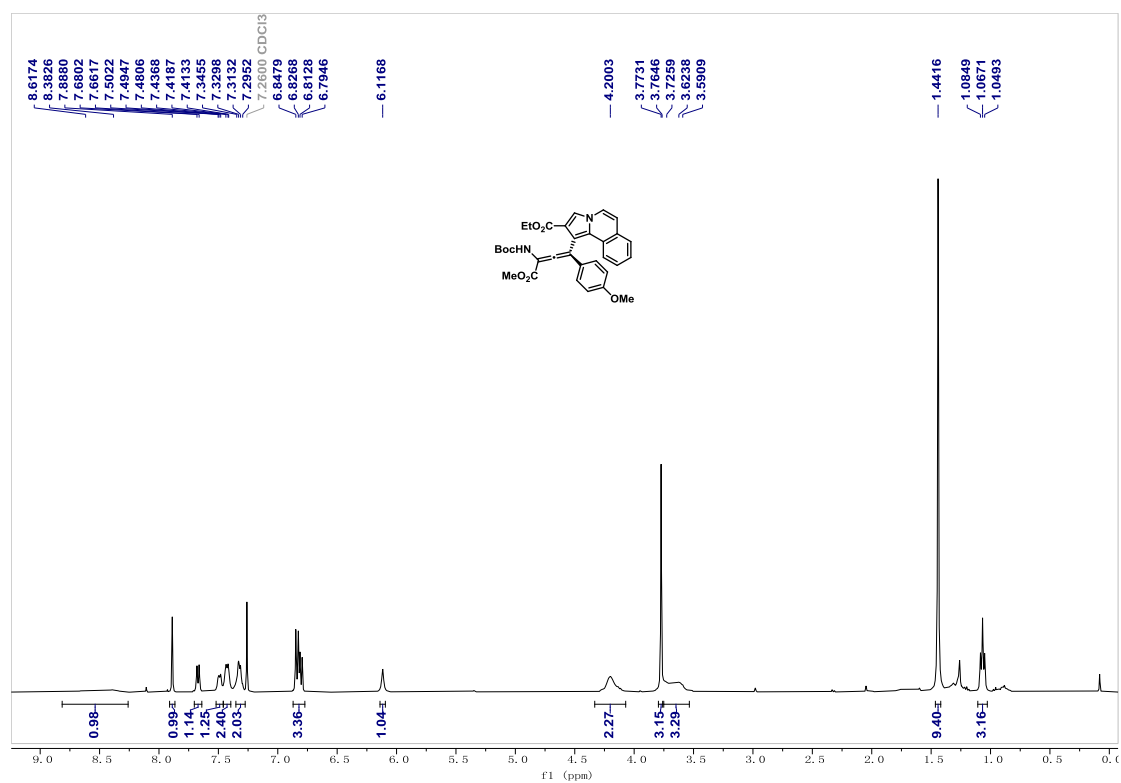

<sup>13</sup>C NMR of **3c** (101 MHz, CDCl<sub>3</sub>)

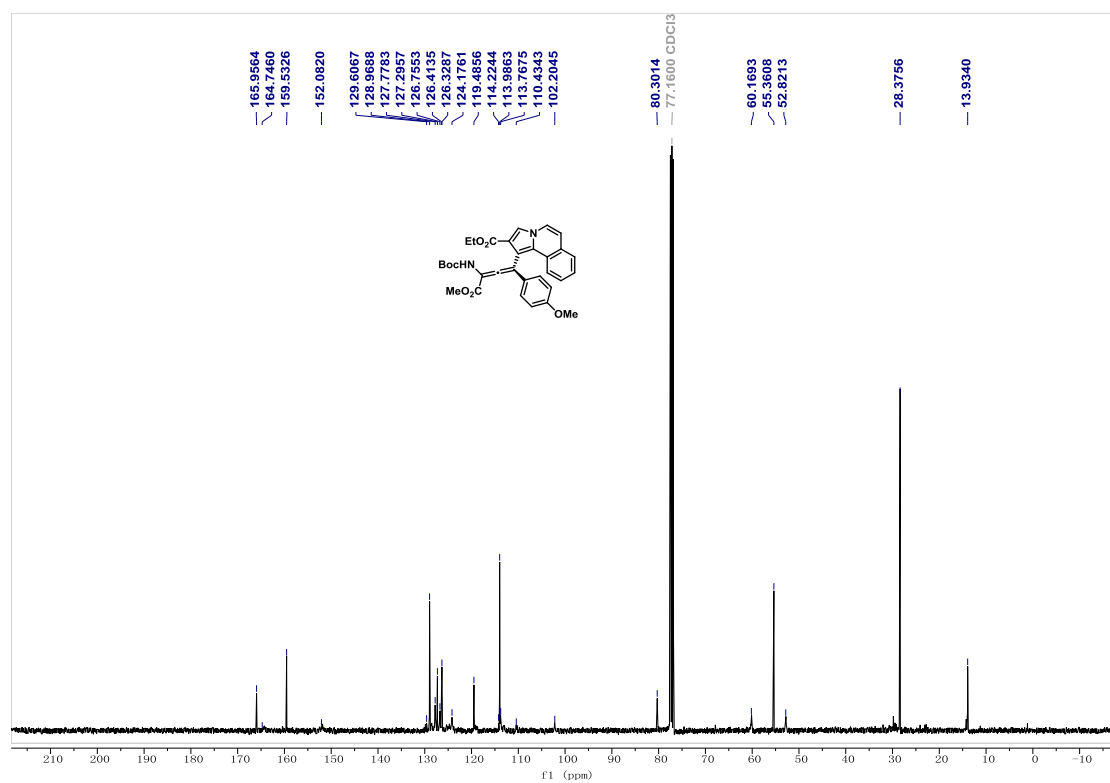

### HPLC analysis: rac-3c

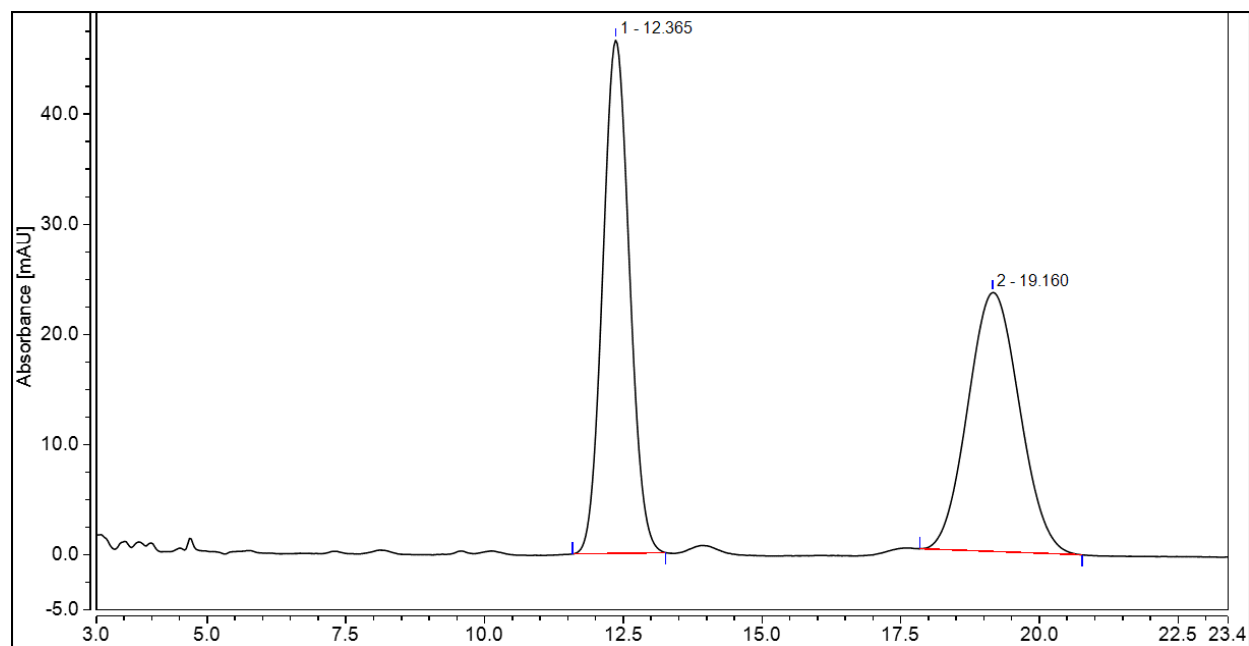

| Peak | RetTime<br>min | Area<br>mAU*min | Height<br>mAU | Area<br>% | Height<br>% |
|------|----------------|-----------------|---------------|-----------|-------------|
| 1    | 12.365         | 26.037          | 46.602        | 50.65     | 66.46       |
| 2    | 19.160         | 25.371          | 23.519        | 49.35     | 33.54       |

### Enantioenriched 3c

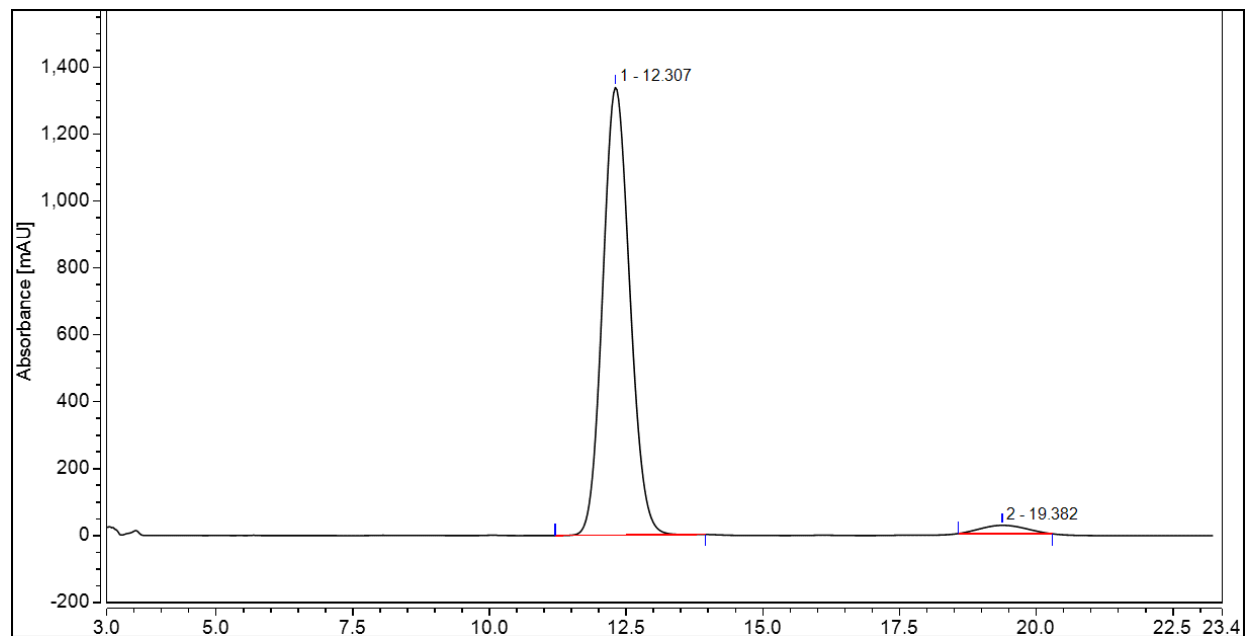

| Peak | RetTime<br>min | Area<br>mAU*min | Height<br>mAU | Area<br>% | Height<br>% |
|------|----------------|-----------------|---------------|-----------|-------------|
| 1    | 12.307         | 767.421         | 1339.192      | 97.00     | 98.17       |
| 2    | 19.382         | 23.739          | 24.983        | 3.00      | 1.83        |

<sup>1</sup>H NMR of **3d** (400 MHz, CDCl<sub>3</sub>)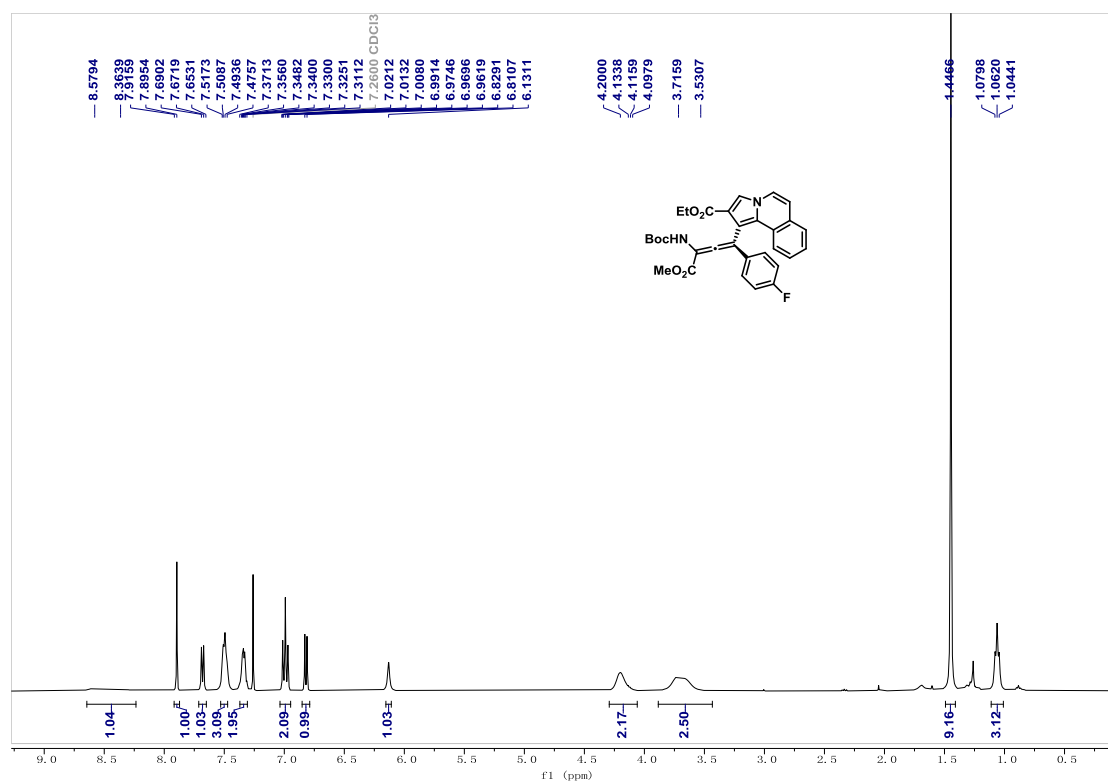 $^{13}\text{C}$  NMR of **3d** (101 MHz,  $\text{CDCl}_3$ )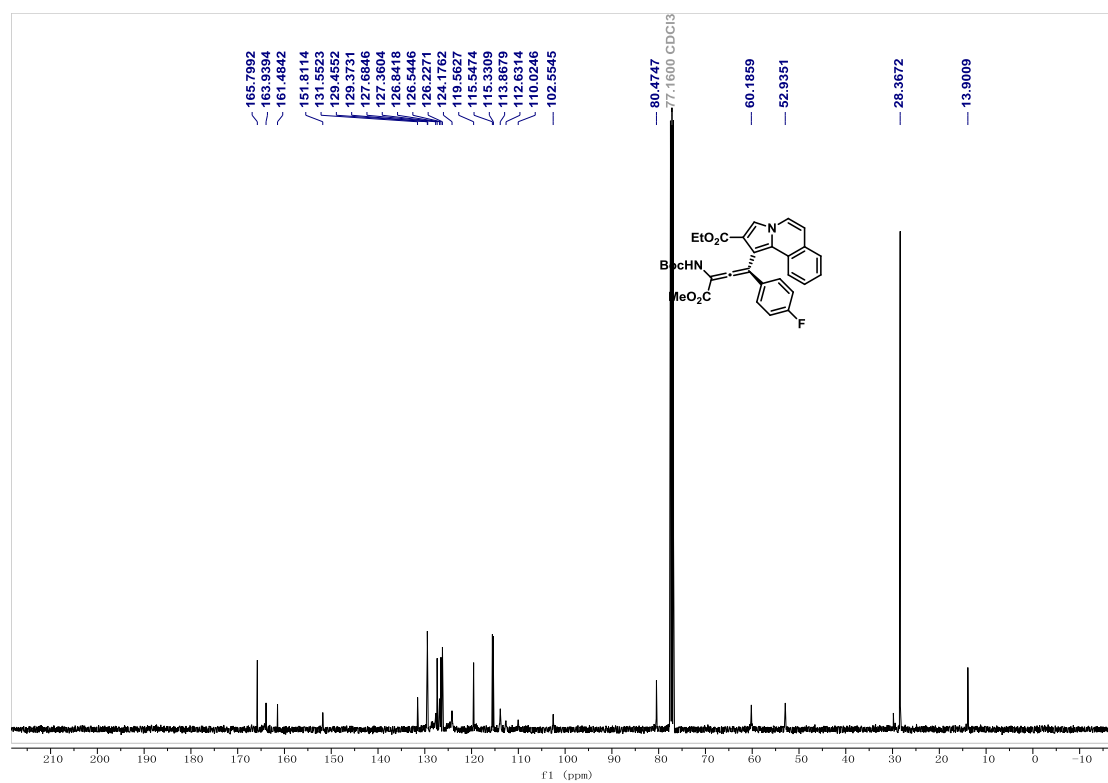

$^{19}\text{F}$  NMR of **3d** (376 MHz,  $\text{CDCl}_3$ )

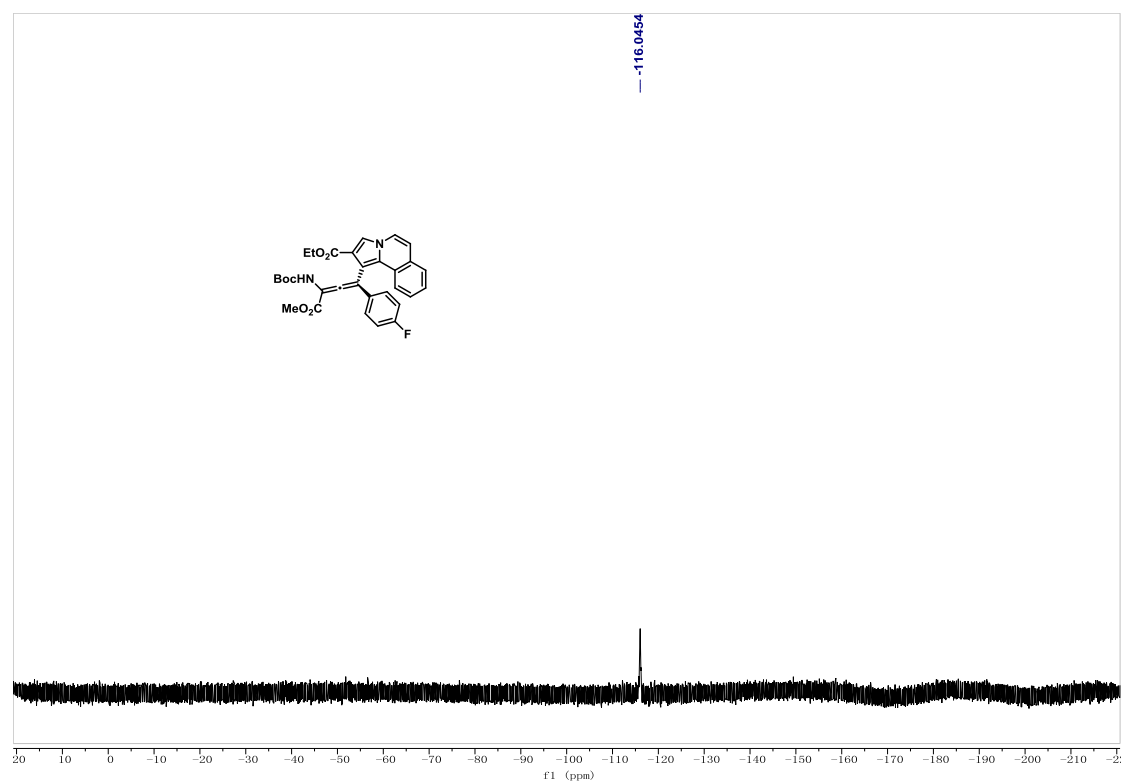

### HPLC analysis: rac-3d

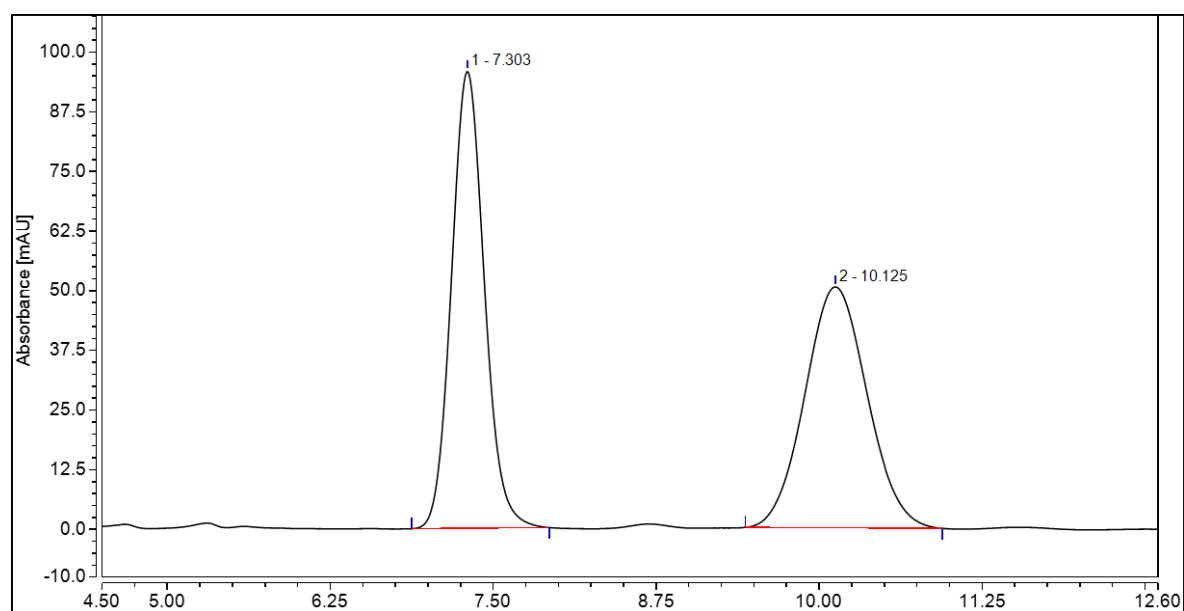

| Peak | RetTime<br>min | Area<br>mAU*min | Height<br>mAU | Area<br>% | Height<br>% |
|------|----------------|-----------------|---------------|-----------|-------------|
| 1    | 7.303          | 27.976          | 95.723        | 50.03     | 65.47       |
| 2    | 10.125         | 27.944          | 50.480        | 49.97     | 34.53       |

### Enantioenriched 3d

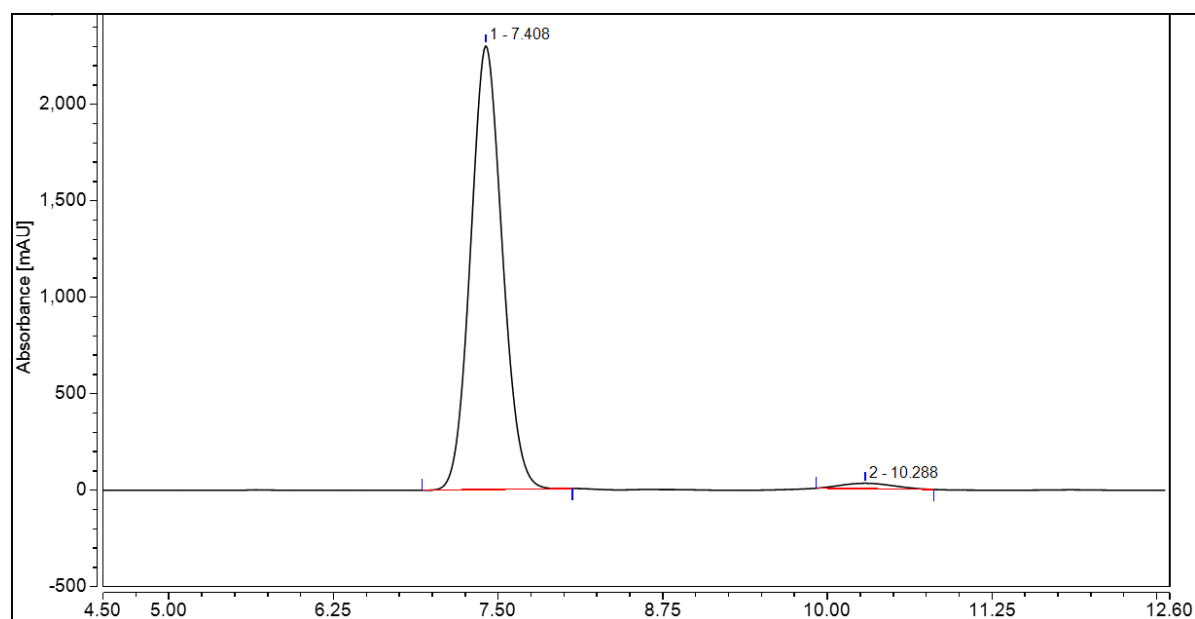

| Peak | RetTime<br>min | Area<br>mAU*min | Height<br>mAU | Area<br>% | Height<br>% |
|------|----------------|-----------------|---------------|-----------|-------------|
| 1    | 7.408          | 640.098         | 2300.420      | 97.98     | 98.78       |
| 2    | 10.288         | 13.180          | 28.498        | 2.02      | 1.22        |

<sup>1</sup>H NMR of **3e** (400 MHz, CDCl<sub>3</sub>)

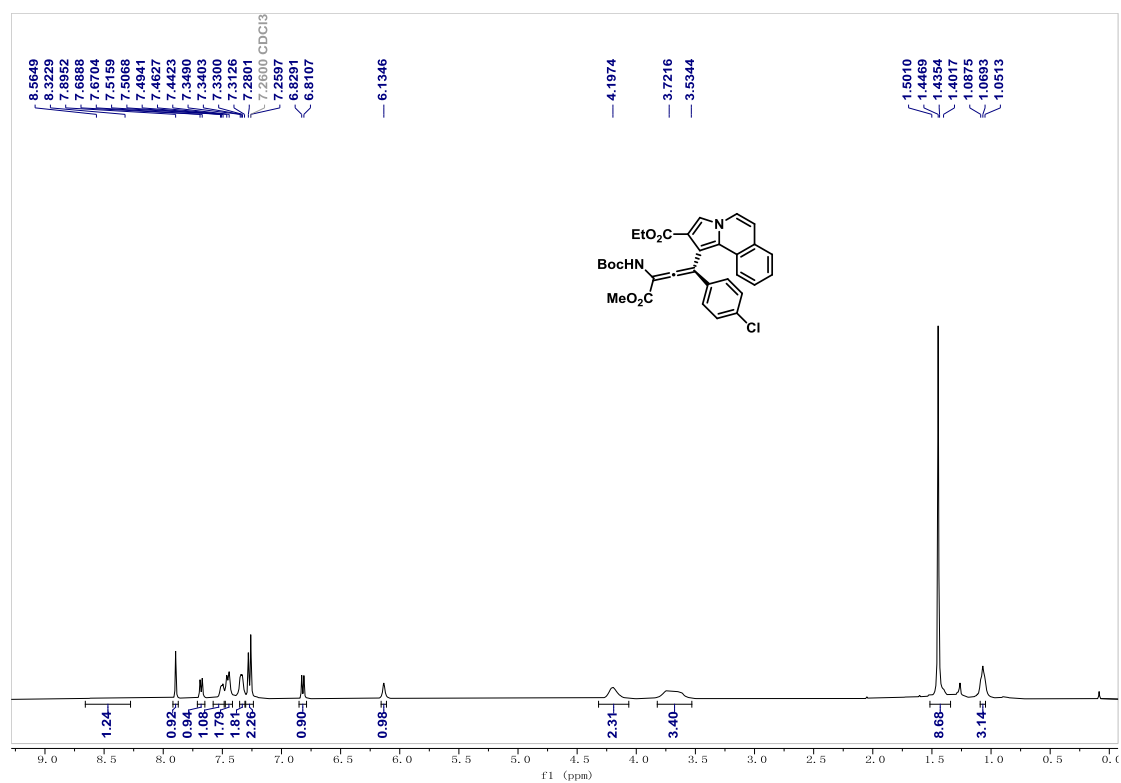

<sup>13</sup>C NMR of **3e** (101 MHz, CDCl<sub>3</sub>)

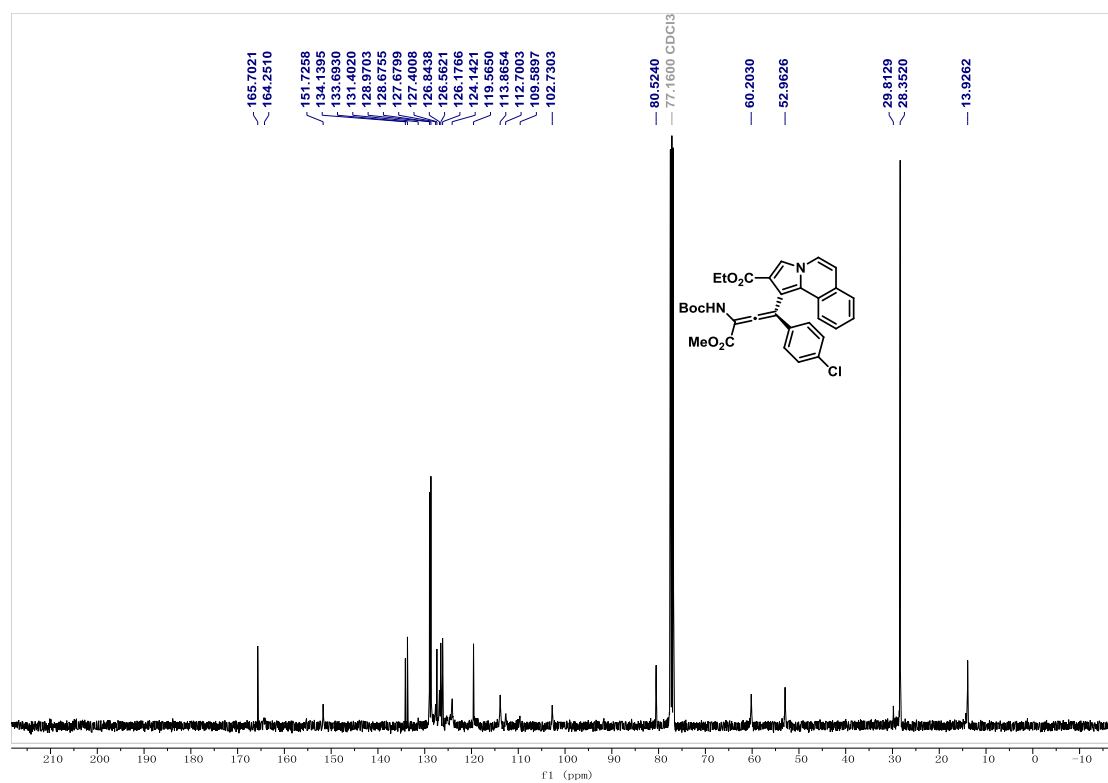

### HPLC analysis: rac-3e

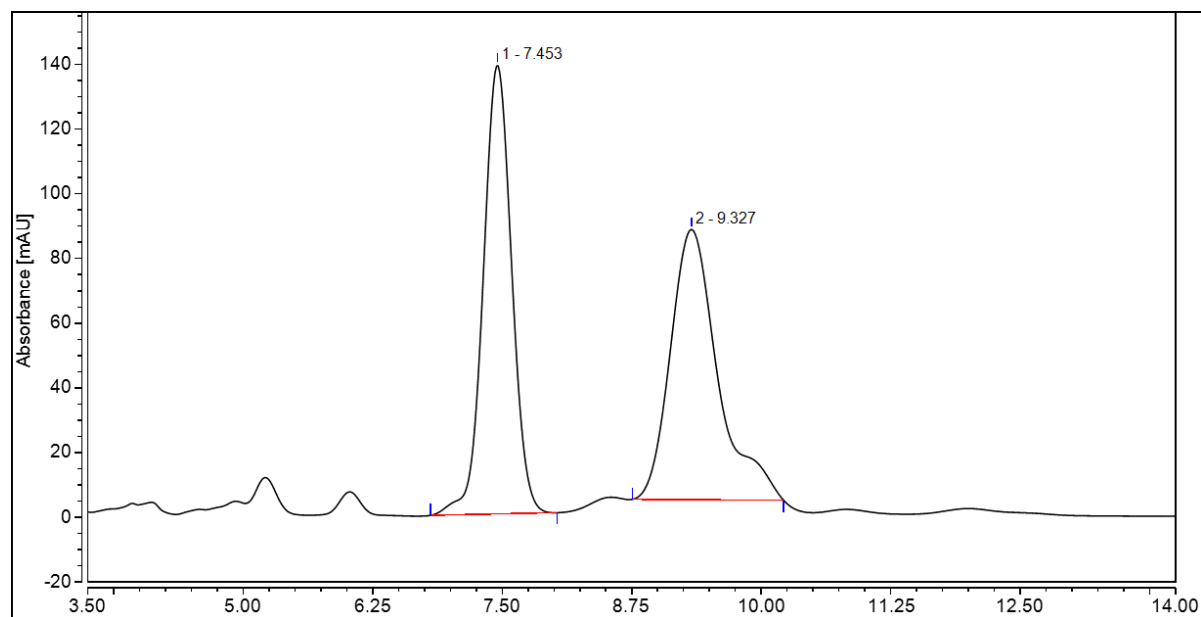

| Peak | RetTime<br>min | Area<br>mAU*min | Height<br>mAU | Area<br>% | Height<br>% |
|------|----------------|-----------------|---------------|-----------|-------------|
| 1    | 7.453          | 44.091          | 138.781       | 49.91     | 62.42       |
| 2    | 9.327          | 44.250          | 83.552        | 50.09     | 37.58       |

### Enantioenriched 3e

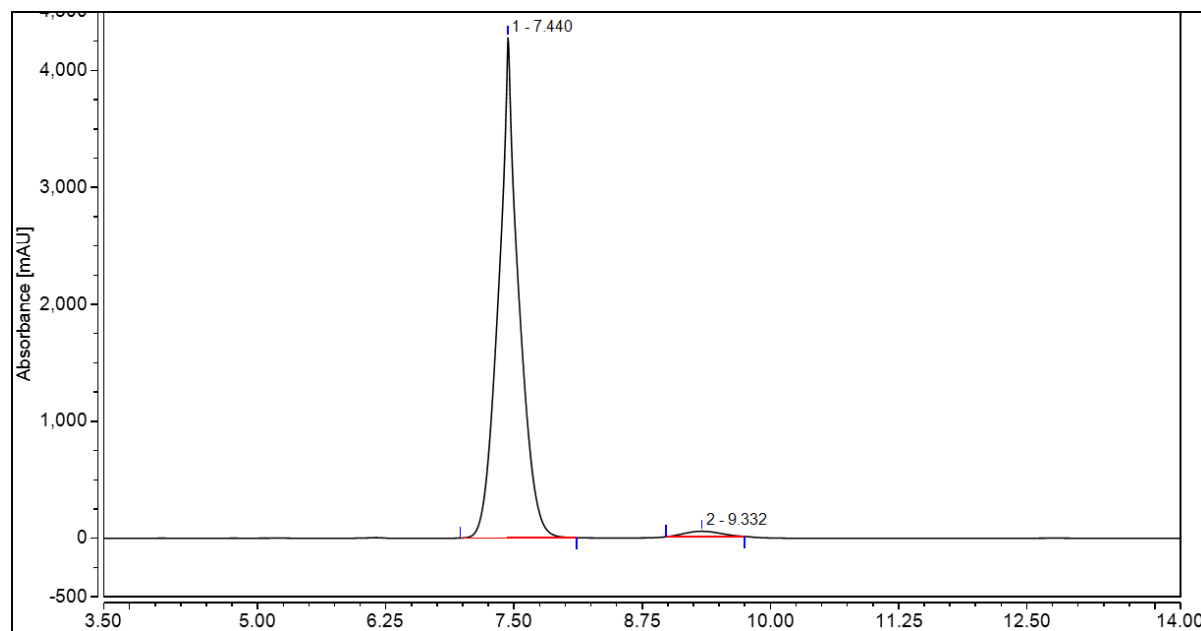

| Peak | RetTime<br>min | Area<br>mAU*min | Height<br>mAU | Area<br>% | Height<br>% |
|------|----------------|-----------------|---------------|-----------|-------------|
| 1    | 7.440          | 972.805         | 4276.012      | 98.11     | 98.93       |
| 2    | 9.332          | 18.761          | 46.139        | 1.89      | 1.07        |

$^1\text{H}$  NMR of **3f** (400 MHz,  $\text{CDCl}_3$ )

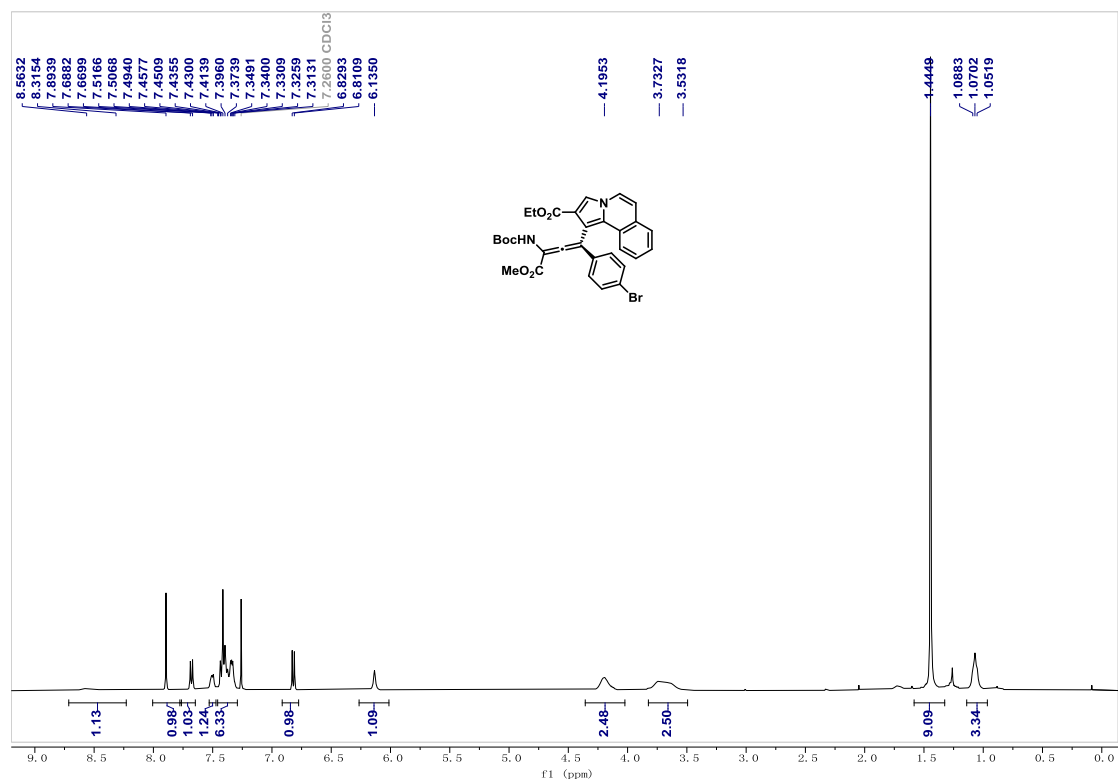

$^{13}\text{C}$  NMR of **3f** (101 MHz,  $\text{CDCl}_3$ )

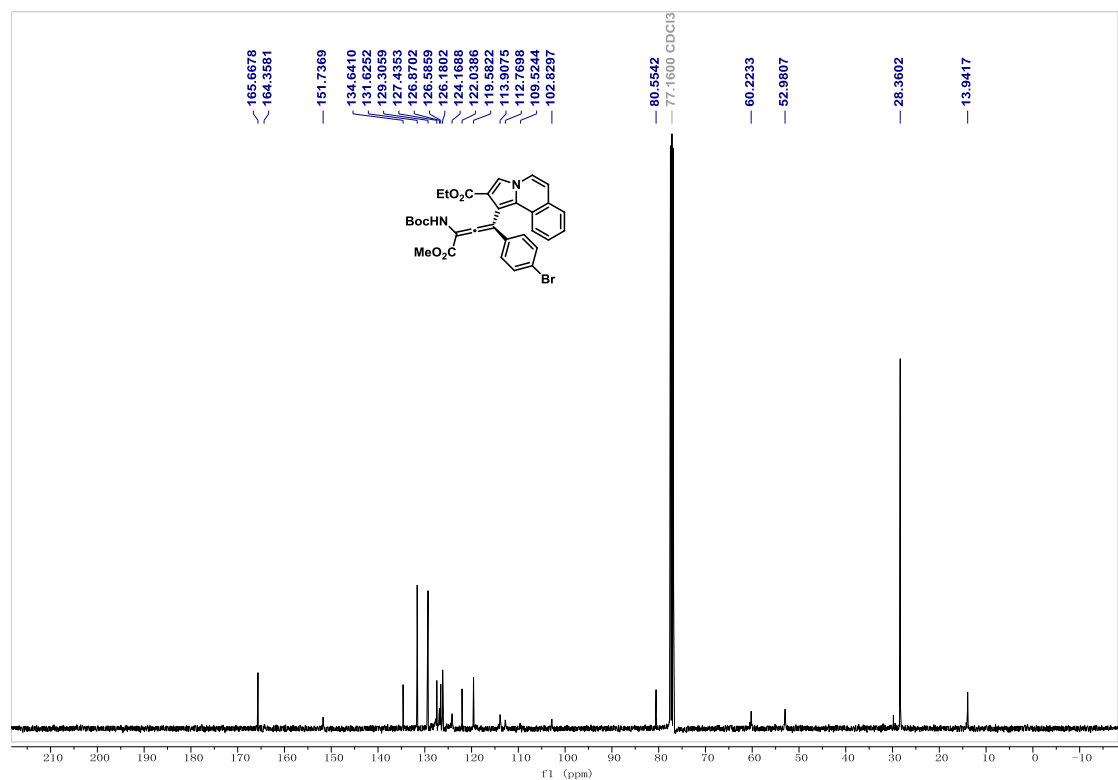

### HPLC analysis: rac-**3f**

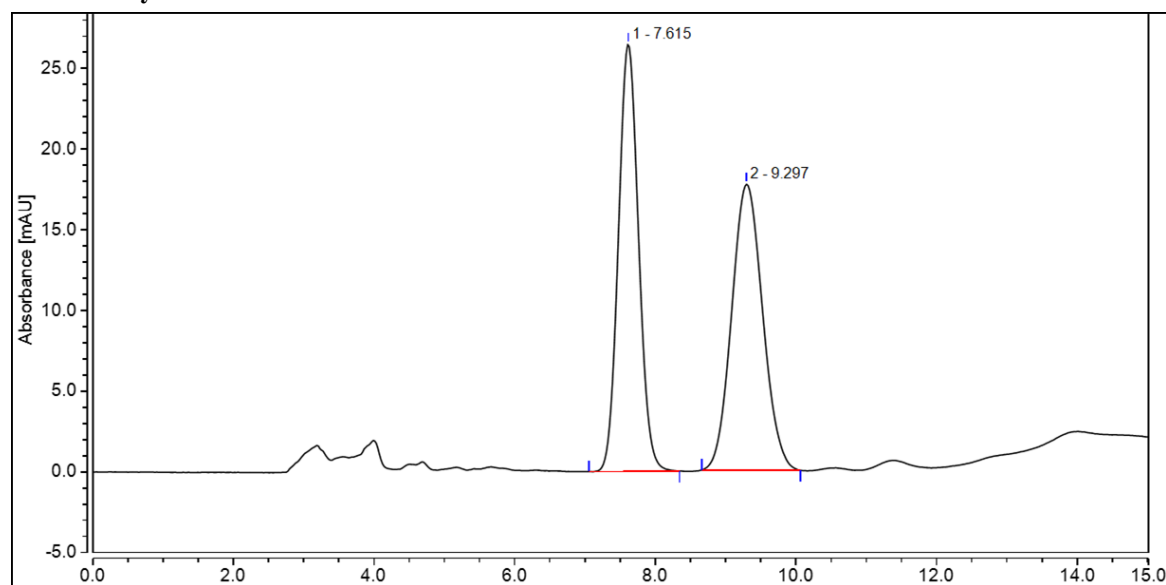

| Peak | RetTime<br>min | Area<br>mAU*min | Height<br>mAU | Area<br>% | Height<br>% |
|------|----------------|-----------------|---------------|-----------|-------------|
| 1    | 7.615          | 8.807           | 26.480        | 49.38     | 59.92       |
| 2    | 9.297          | 9.028           | 17.714        | 50.62     | 40.08       |

### Enantioenriched **3f**

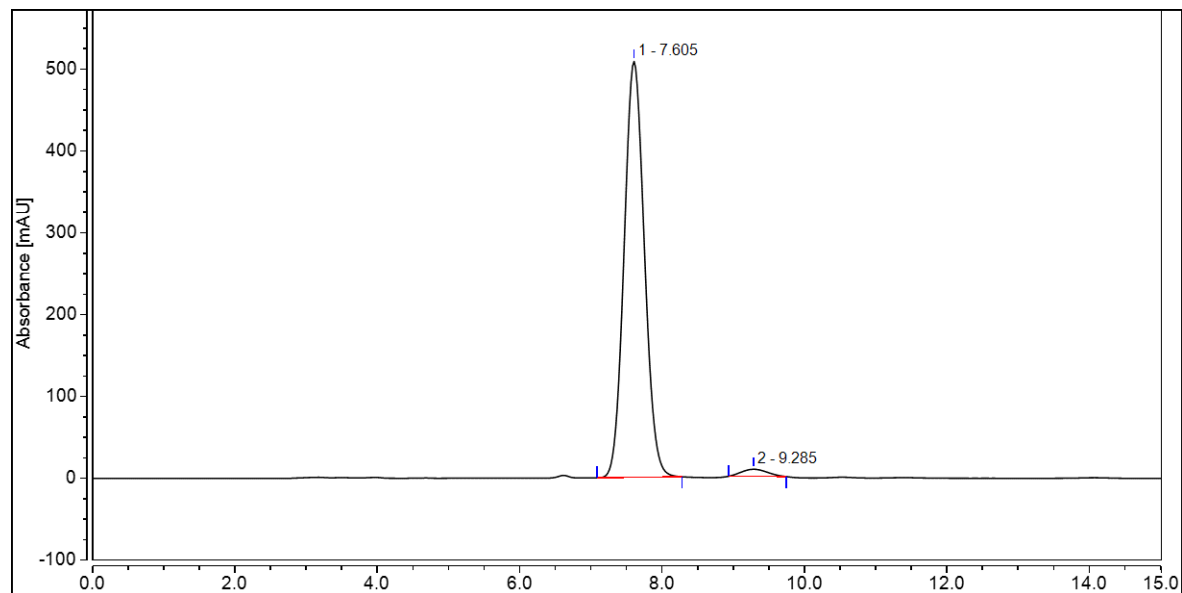

| Peak | RetTime<br>min | Area<br>mAU*min | Height<br>mAU | Area<br>% | Height<br>% |
|------|----------------|-----------------|---------------|-----------|-------------|
| 1    | 7.605          | 167.717         | 508.396       | 97.86     | 98.32       |
| 2    | 9.285          | 3.662           | 8.705         | 2.14      | 1.68        |

$^1\text{H}$  NMR of **3g** (400 MHz,  $\text{CDCl}_3$ )

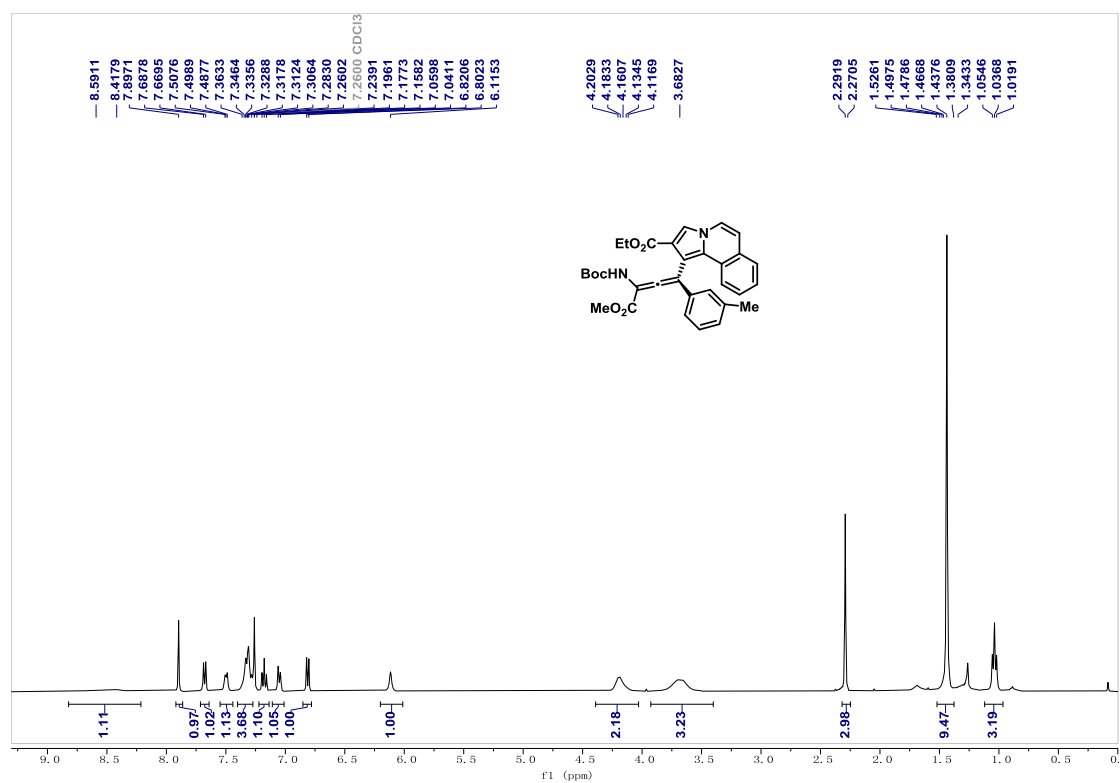

$^{13}\text{C}$  NMR of **3g** (101 MHz,  $\text{CDCl}_3$ )

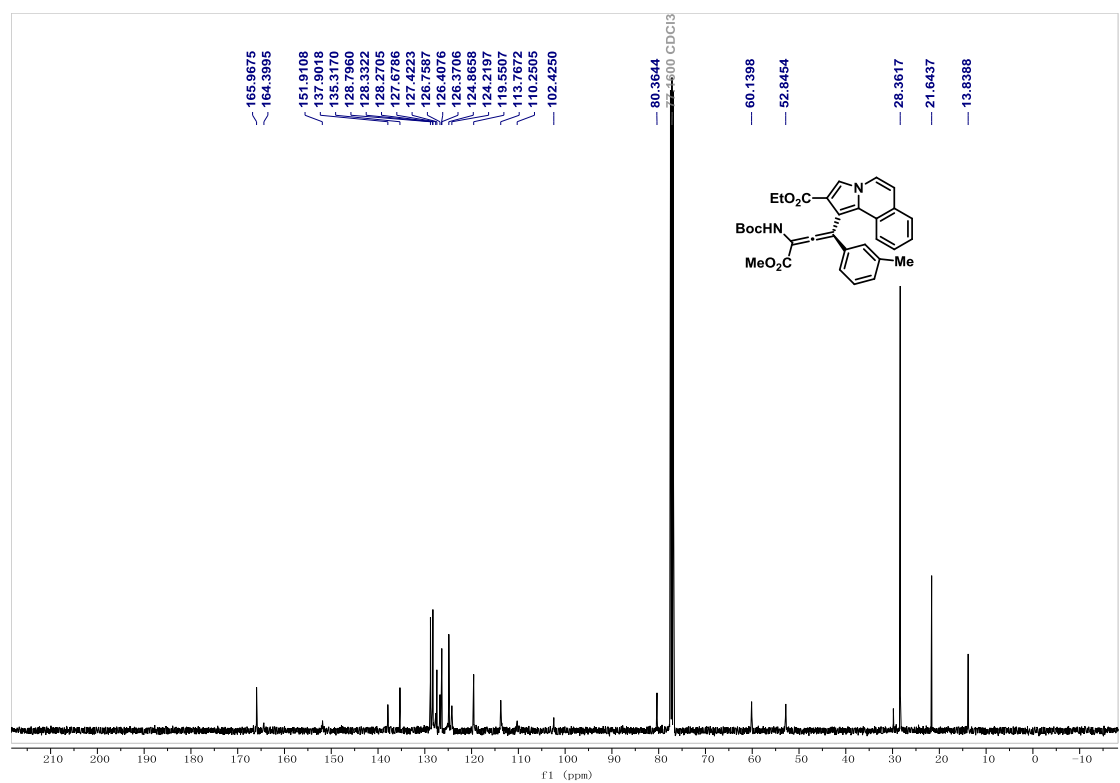

### HPLC analysis: rac-3g

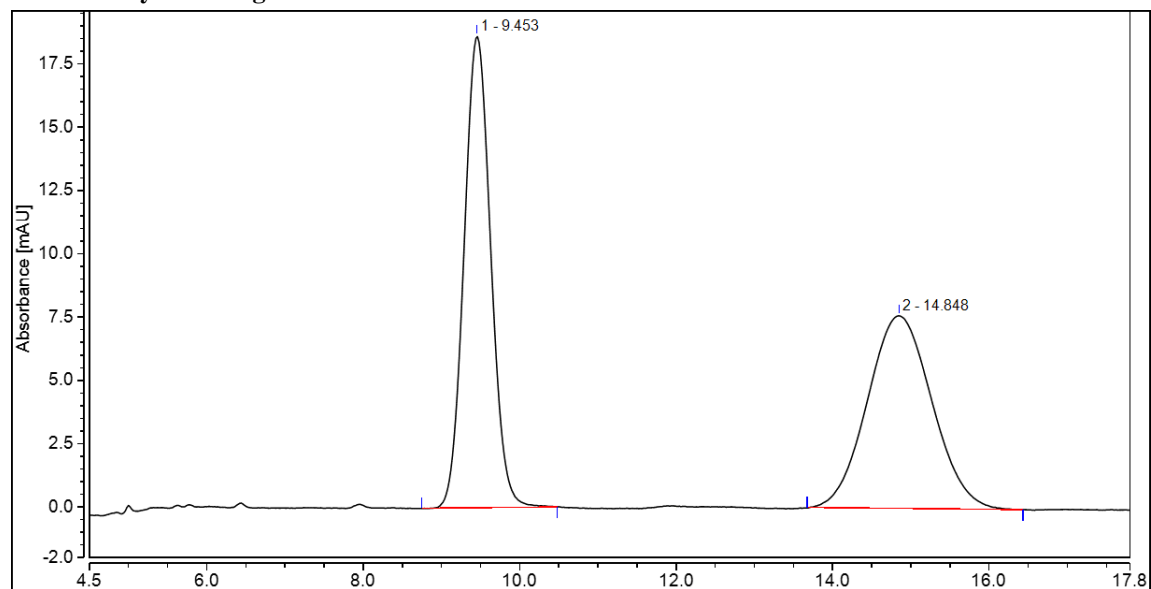

| Peak | RetTime<br>min | Area<br>mAU*min | Height<br>mAU | Area<br>% | Height<br>% |
|------|----------------|-----------------|---------------|-----------|-------------|
| 1    | 9.453          | 7.362           | 18.625        | 50.31     | 70.98       |
| 2    | 14.848         | 7.271           | 7.616         | 49.69     | 29.02       |

### Enantioenriched 3g

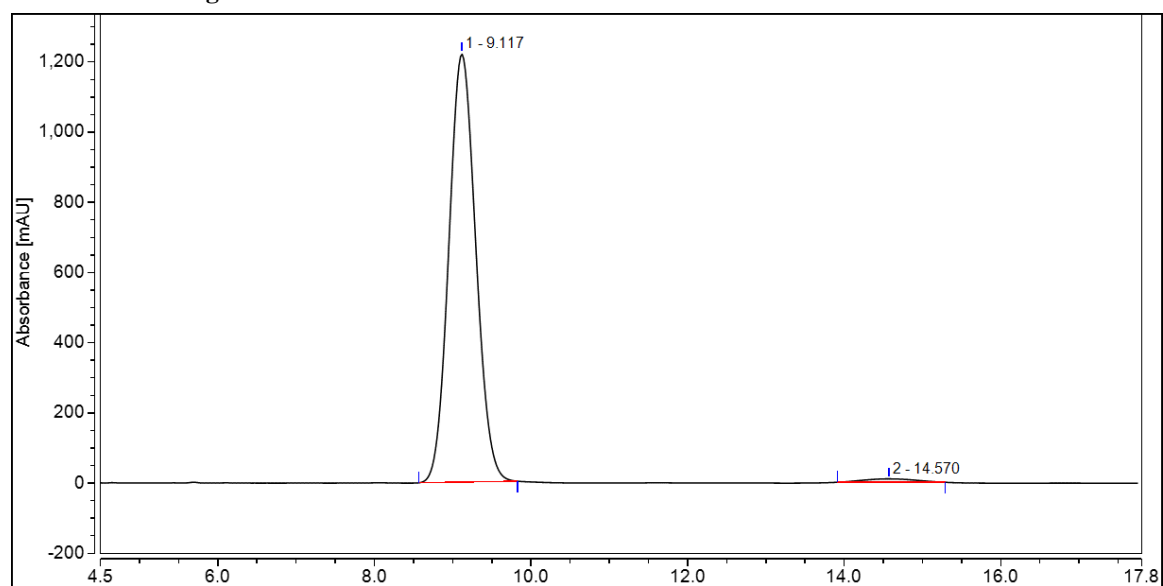

| Peak | RetTime<br>min | Area<br>mAU*min | Height<br>mAU | Area<br>% | Height<br>% |
|------|----------------|-----------------|---------------|-----------|-------------|
| 1    | 9.117          | 485.553         | 1219.586      | 98.47     | 99.21       |
| 2    | 14.570         | 7.523           | 9.709         | 1.53      | 0.79        |

$^1\text{H}$  NMR of **3h** (400 MHz,  $\text{CDCl}_3$ )

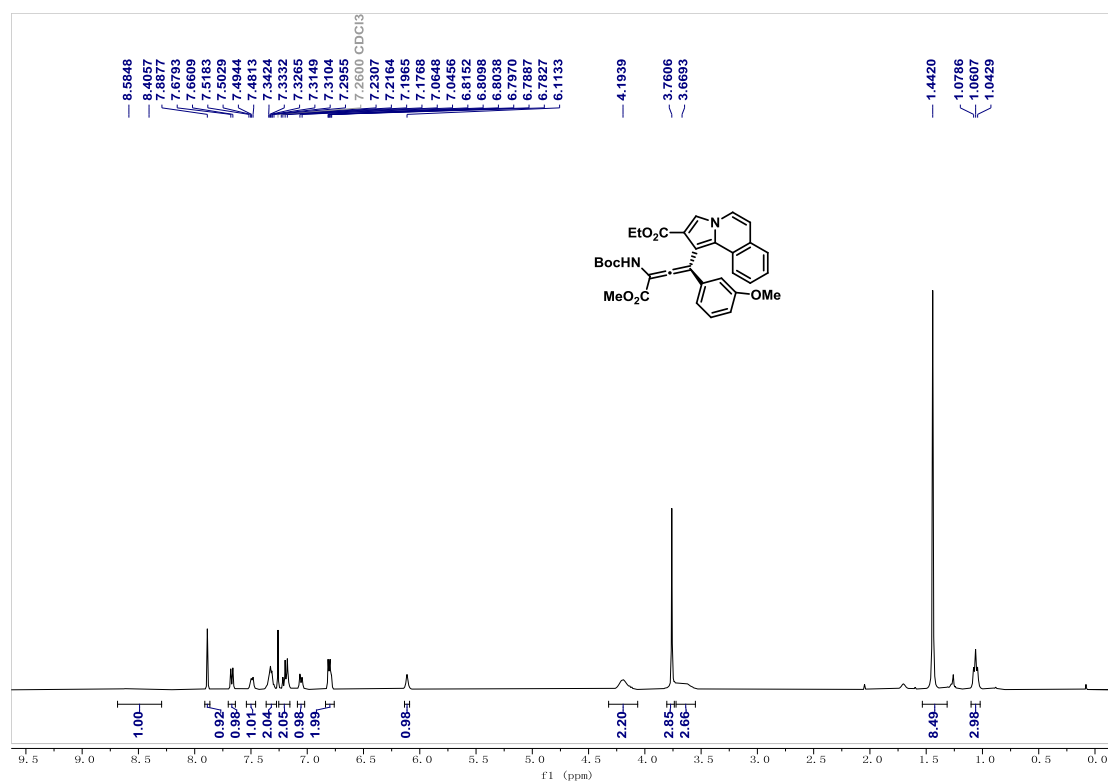

$^{13}\text{C}$  NMR of **3h** (101 MHz,  $\text{CDCl}_3$ )

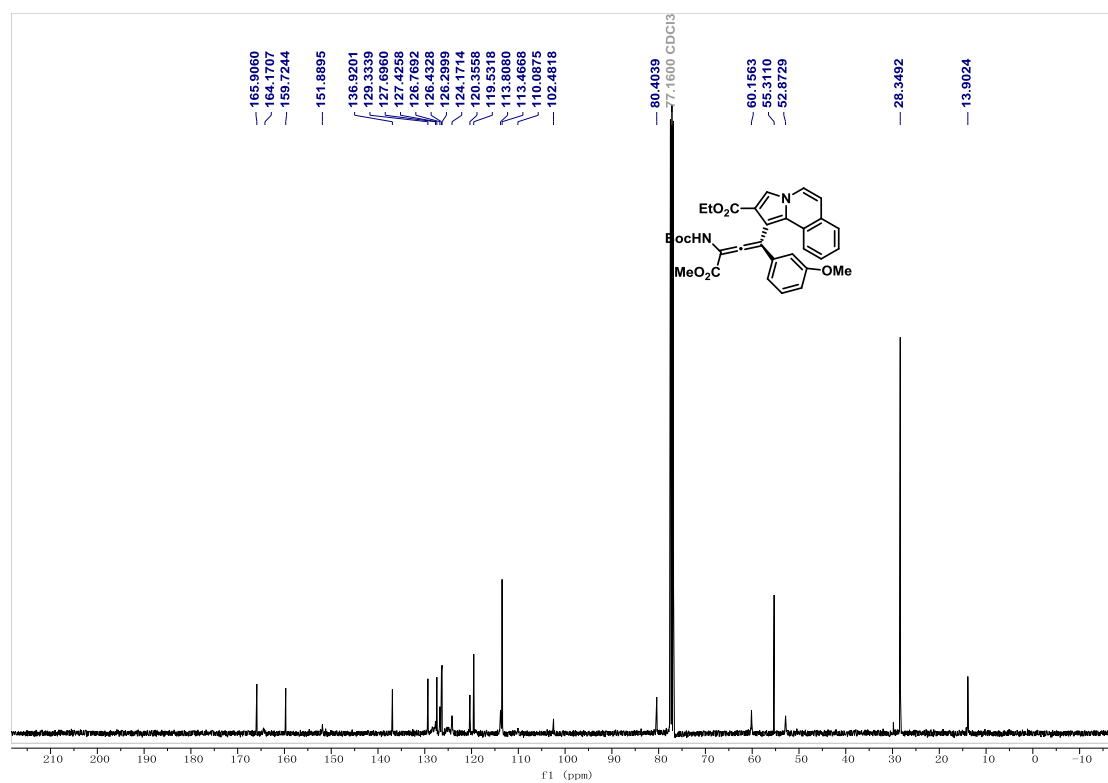

### HPLC analysis: rac-3h

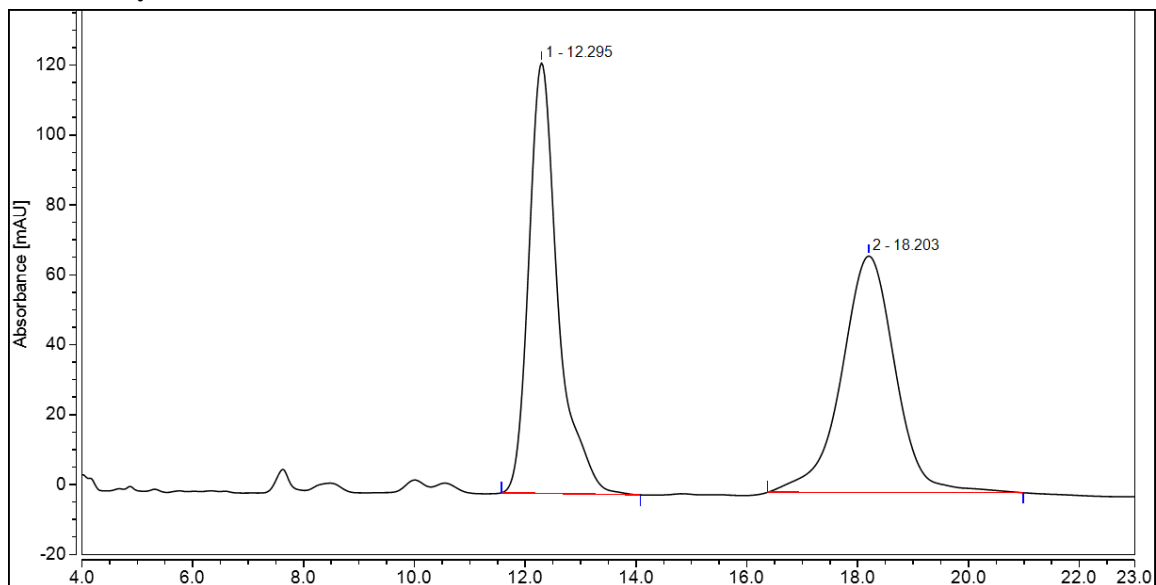

| Peak | RetTime<br>min | Area<br>mAU*min | Height<br>mAU | Area<br>% | Height<br>% |
|------|----------------|-----------------|---------------|-----------|-------------|
| 1    | 12.295         | 74.942          | 123.201       | 49.69     | 64.56       |
| 2    | 18.203         | 75.874          | 67.635        | 50.31     | 35.44       |

### Enantioenriched 3h

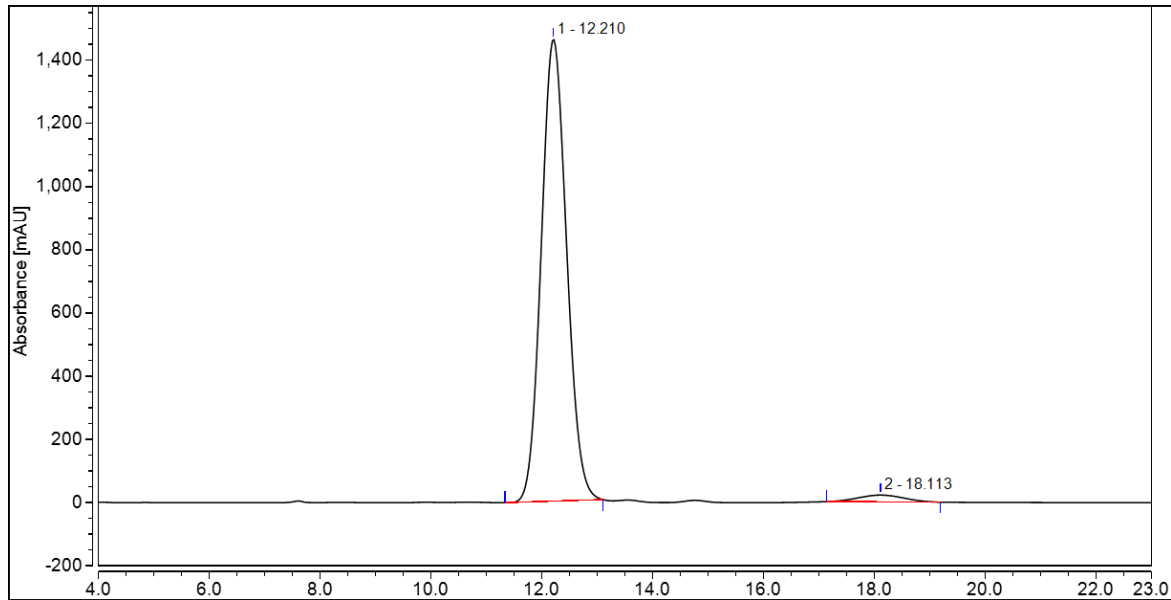

| Peak | RetTime<br>min | Area<br>mAU*min | Height<br>mAU | Area<br>% | Height<br>% |
|------|----------------|-----------------|---------------|-----------|-------------|
| 1    | 12.210         | 773.686         | 1462.097      | 97.41     | 98.55       |
| 2    | 18.113         | 20.589          | 21.474        | 2.59      | 1.45        |

<sup>1</sup>H NMR of **3i** (400 MHz, CDCl<sub>3</sub>)

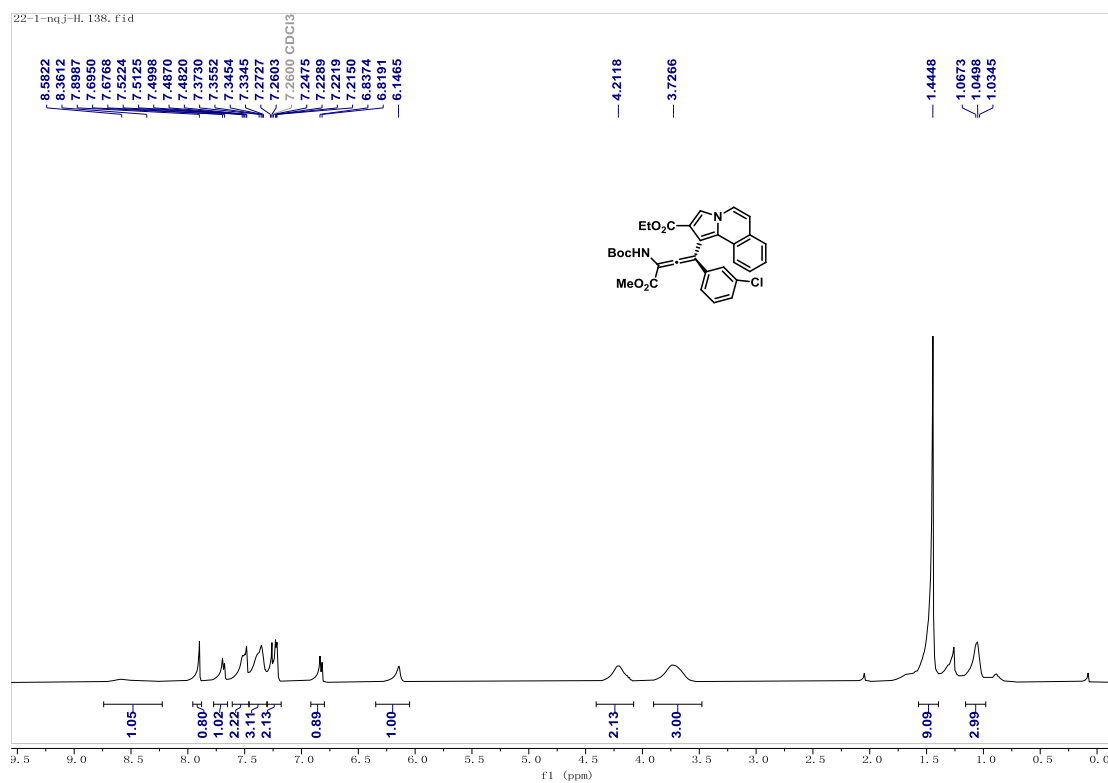

<sup>13</sup>C NMR of **3i** (101 MHz, CDCl<sub>3</sub>)

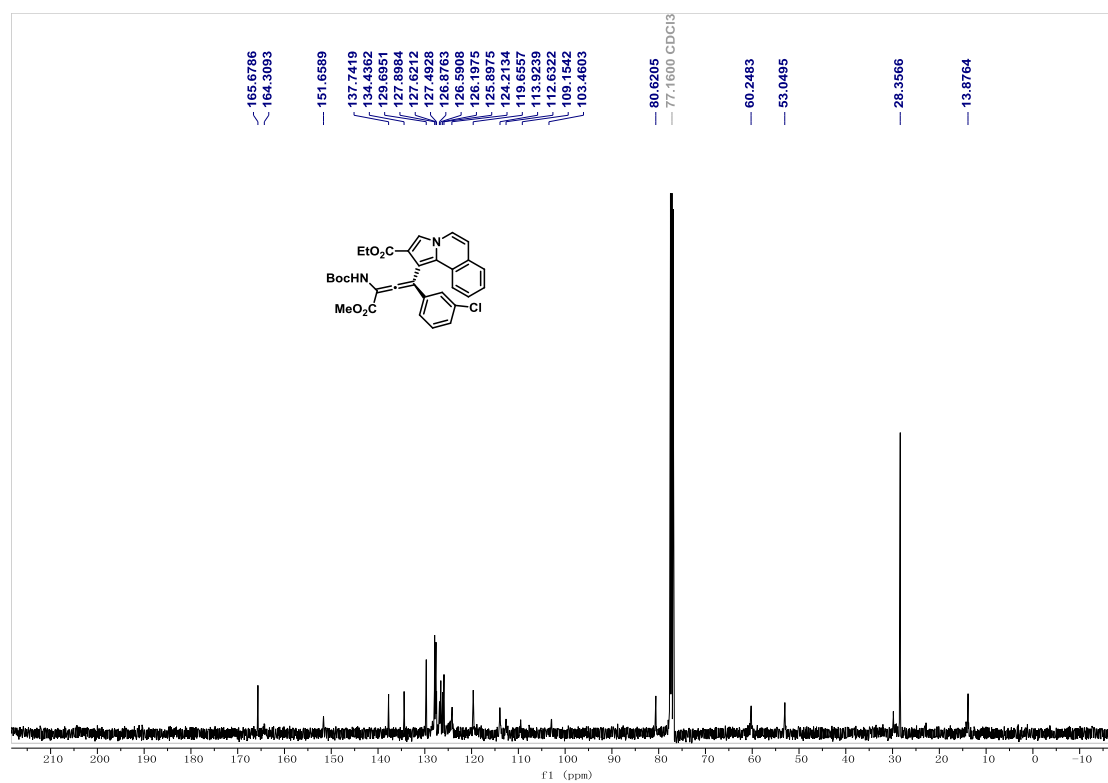

### HPLC analysis: rac-3i

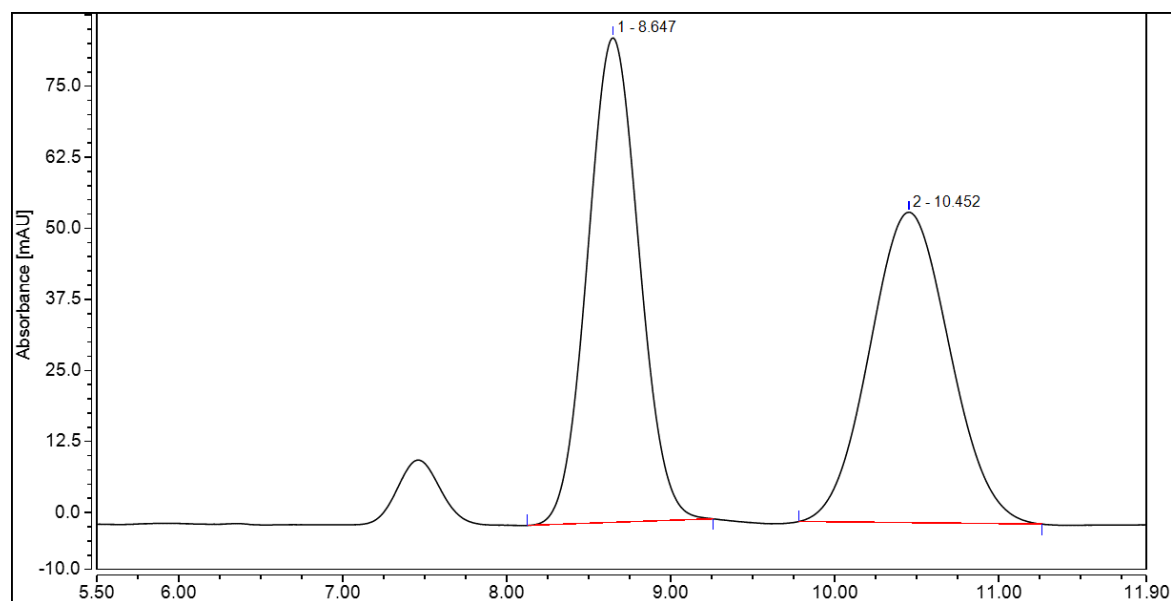

| Peak | RetTime<br>min | Area<br>mAU*min | Height<br>mAU | Area<br>% | Height<br>% |
|------|----------------|-----------------|---------------|-----------|-------------|
| 1    | 8.647          | 31.035          | 85.256        | 50.08     | 60.95       |
| 2    | 10.452         | 30.940          | 54.618        | 49.92     | 39.05       |

### Enantioenriched 3i

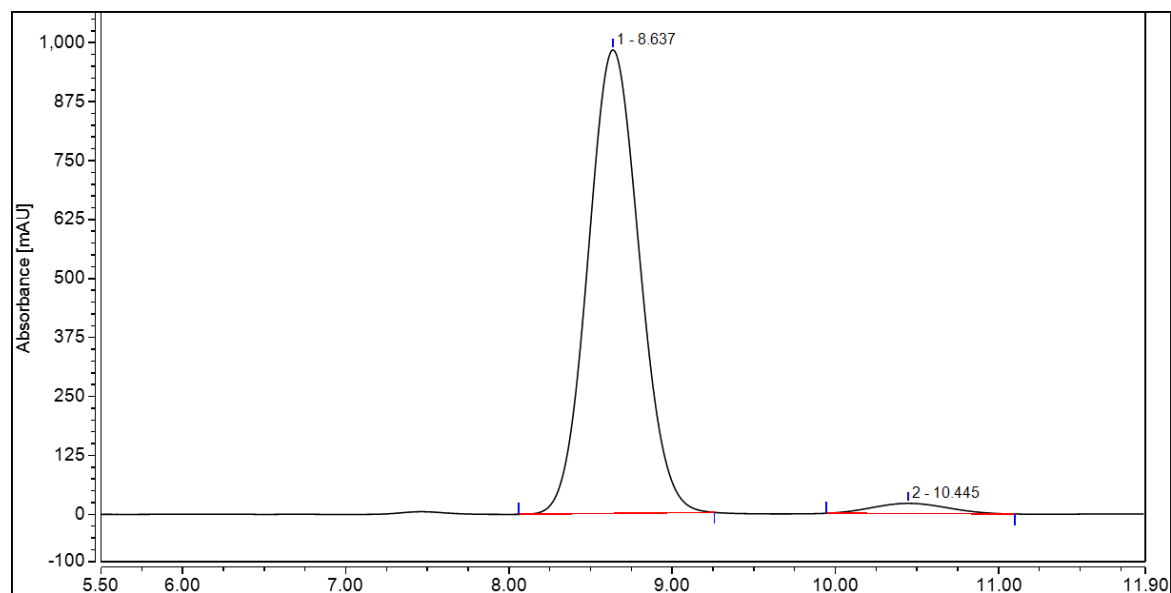

| Peak | RetTime<br>min | Area<br>mAU*min | Height<br>mAU | Area<br>% | Height<br>% |
|------|----------------|-----------------|---------------|-----------|-------------|
| 1    | 8.637          | 359.356         | 982.973       | 96.87     | 97.84       |
| 2    | 10.445         | 11.607          | 21.692        | 3.13      | 2.16        |

$^1\text{H}$  NMR of **3j** (400 MHz,  $\text{CDCl}_3$ )

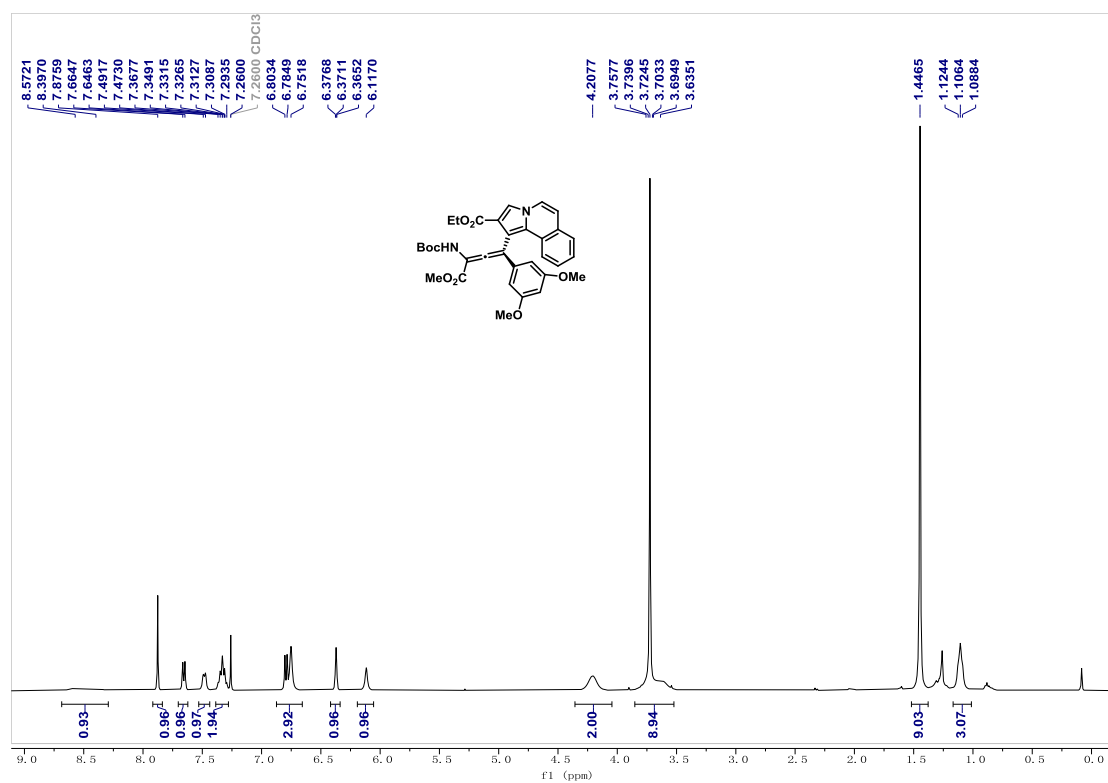

$^{13}\text{C}$  NMR of **3j** (101 MHz,  $\text{CDCl}_3$ )

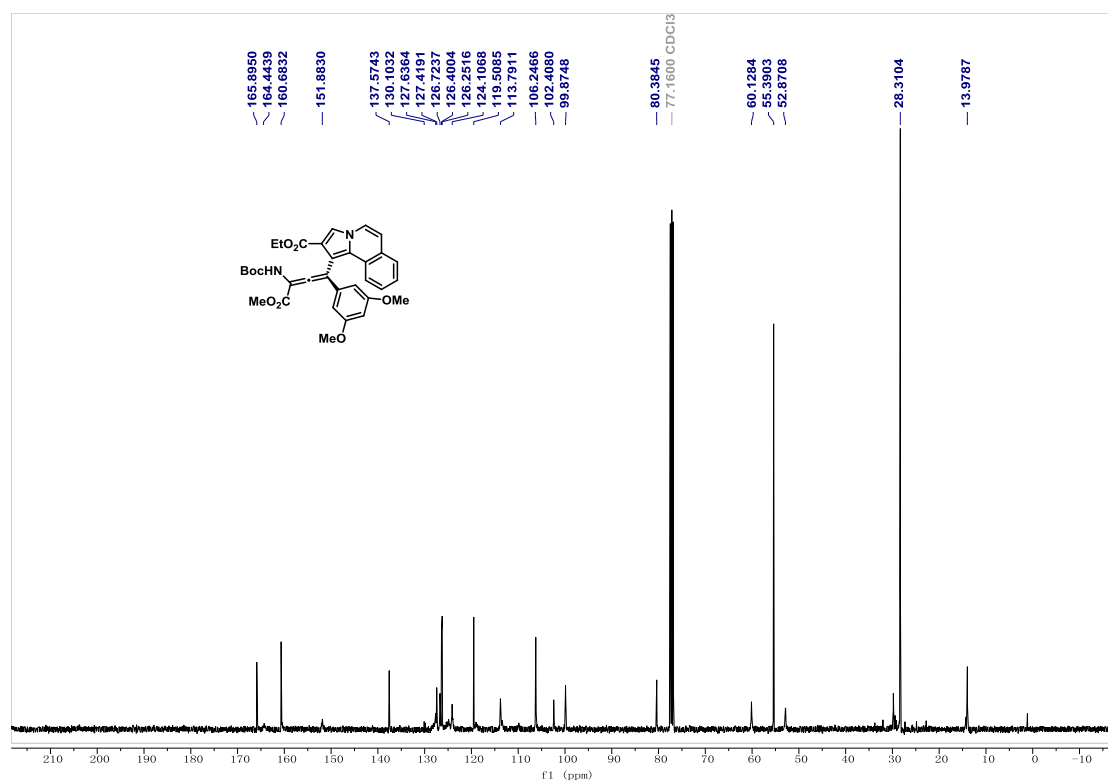

### HPLC analysis: rac-3j

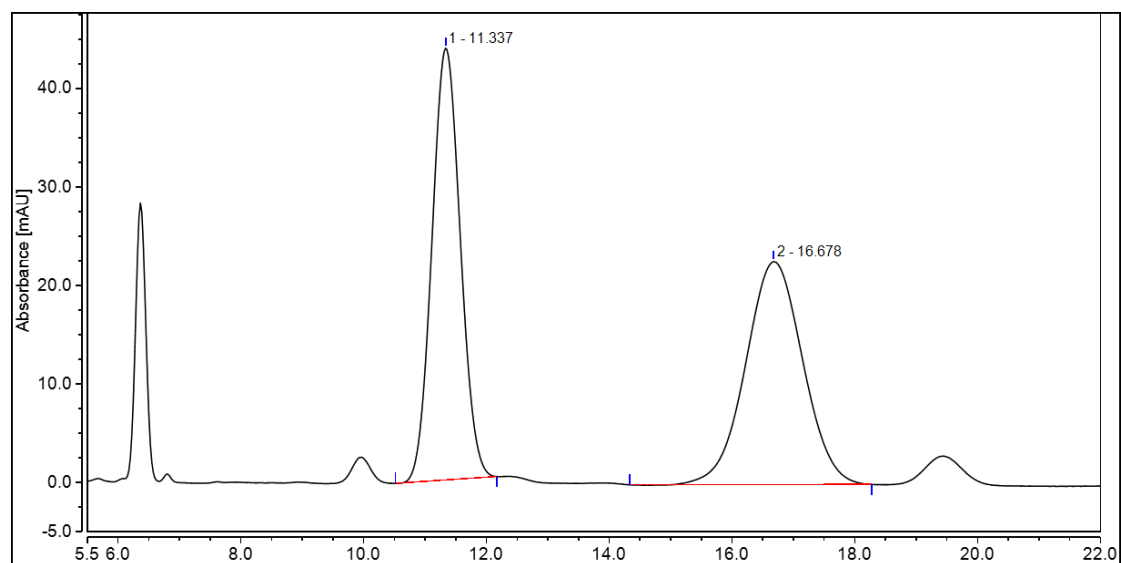

| Peak | RetTime<br>min | Area<br>mAU*min | Height<br>mAU | Area<br>% | Height<br>% |
|------|----------------|-----------------|---------------|-----------|-------------|
| 1    | 11.337         | 23.458          | 43.860        | 49.05     | 65.96       |
| 2    | 16.678         | 24.370          | 22.638        | 50.95     | 34.04       |

### Enantioenriched 3j

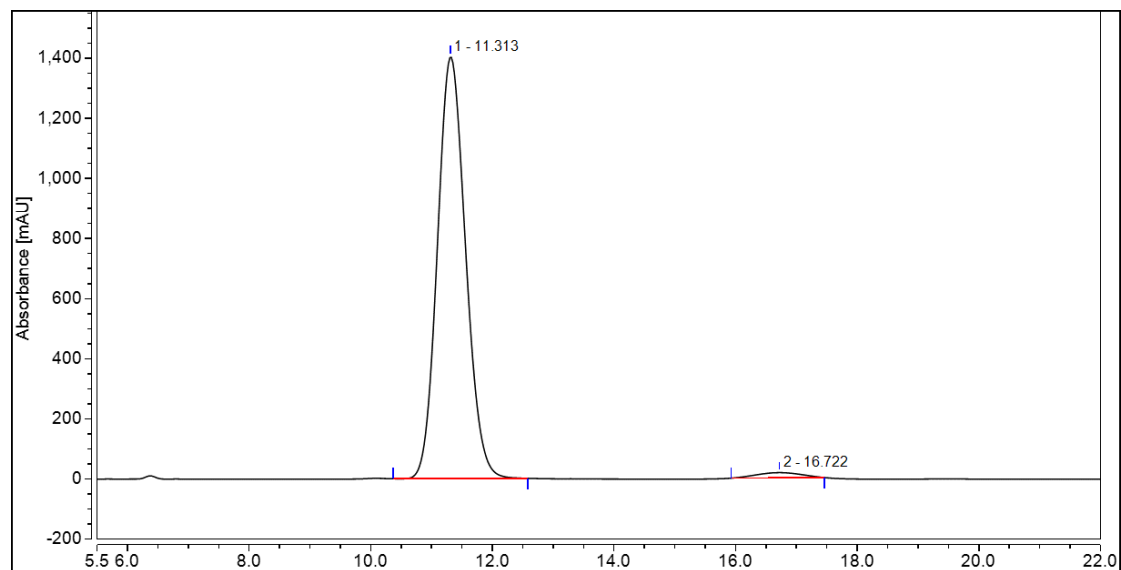

| Peak | RetTime<br>min | Area<br>mAU*min | Height<br>mAU | Area<br>% | Height<br>% |
|------|----------------|-----------------|---------------|-----------|-------------|
| 1    | 11.313         | 751.252         | 1403.323      | 98.07     | 98.78       |
| 2    | 16.722         | 14.755          | 17.334        | 1.93      | 1.22        |

<sup>1</sup>H NMR of **3k** (500 MHz, CDCl<sub>3</sub>)

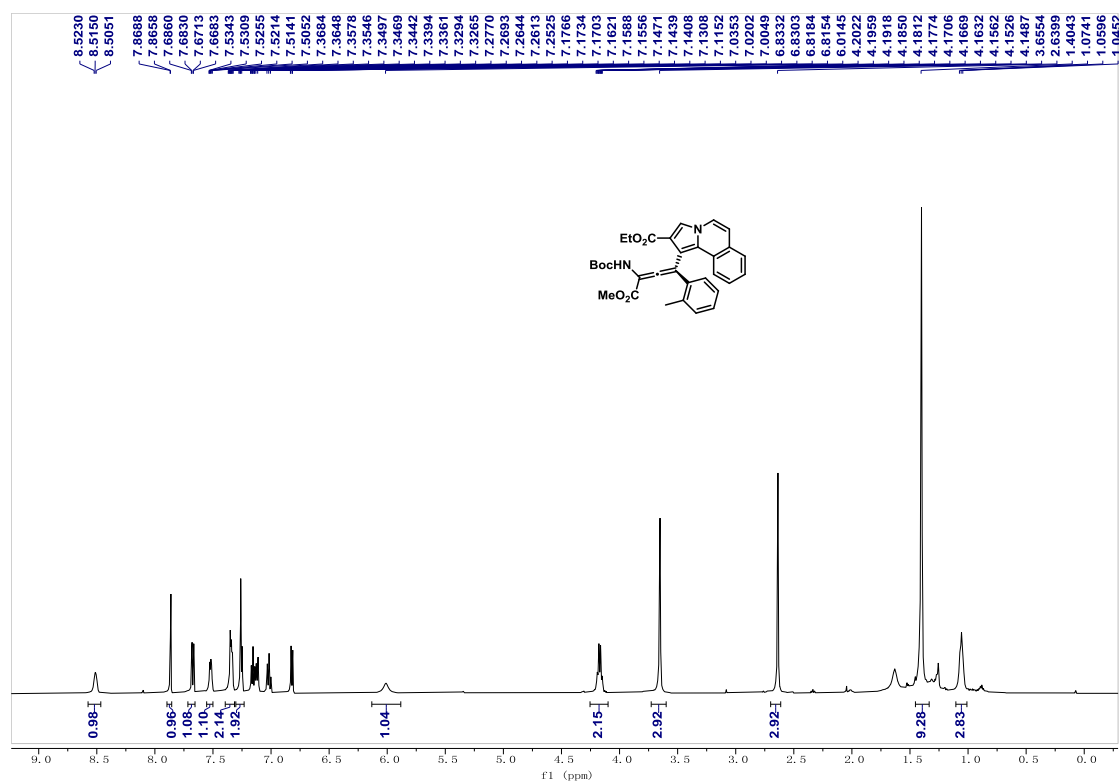

<sup>13</sup>C NMR of **3k** (126 MHz, CDCl<sub>3</sub>)

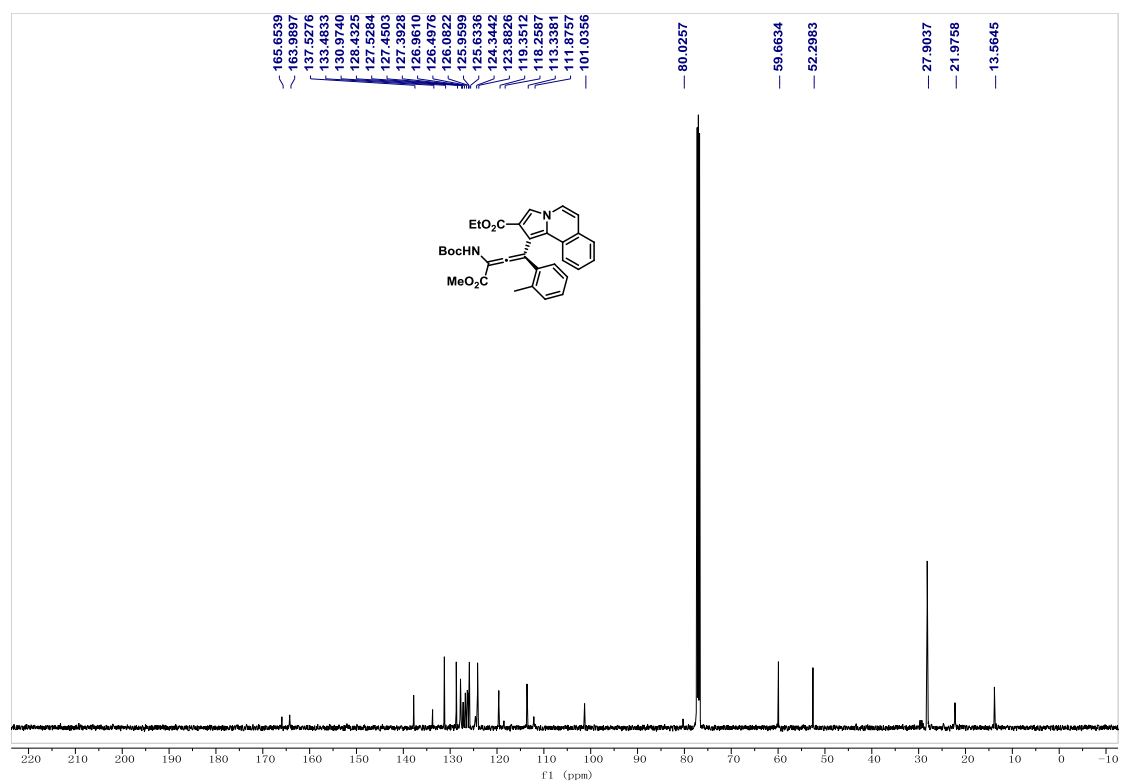

### HPLC analysis: rac-3k

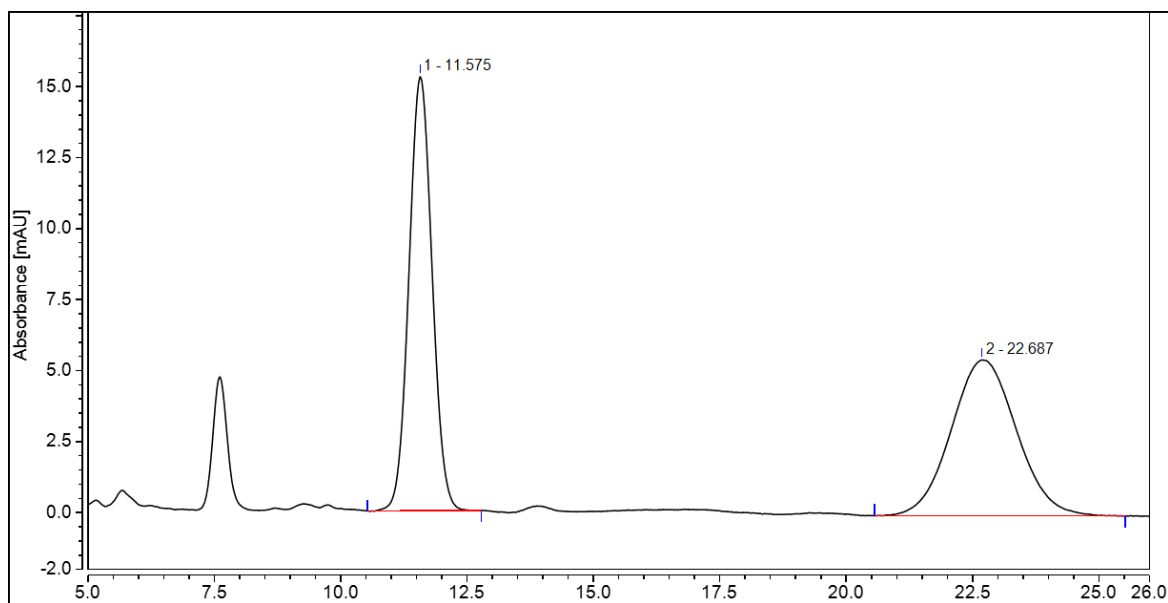

| Peak | RetTime<br>min | Area<br>mAU*min | Height<br>mAU | Area<br>% | Height<br>% |
|------|----------------|-----------------|---------------|-----------|-------------|
| 1    | 11.575         | 8.128           | 15.297        | 49.70     | 73.58       |
| 2    | 22.687         | 8.226           | 5.494         | 50.30     | 26.42       |

### Enantioenriched 3k

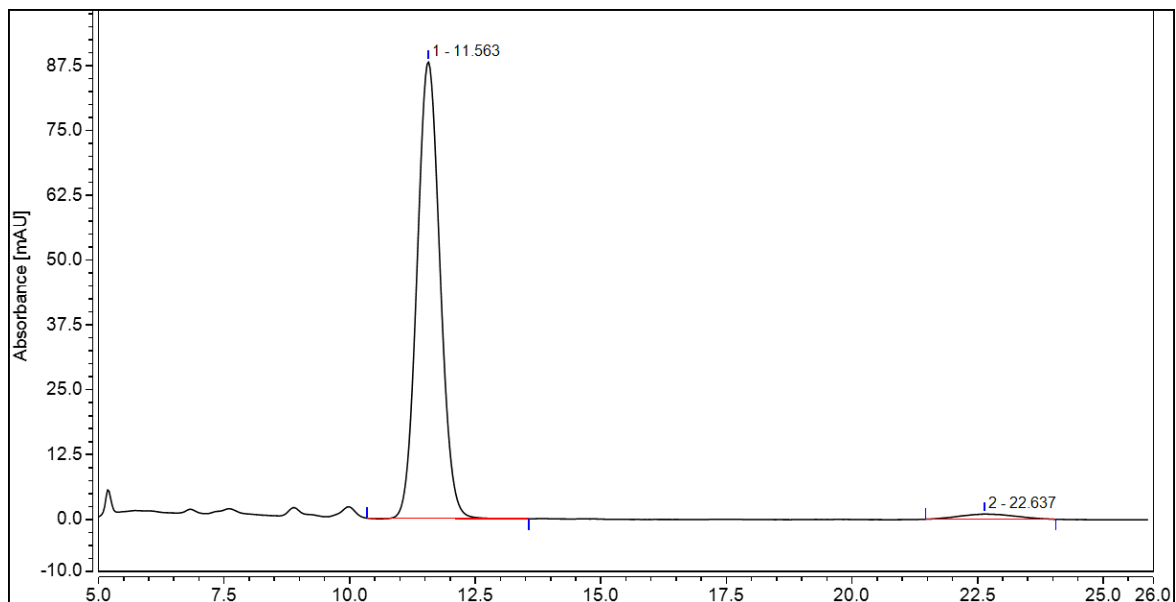

| Peak | RetTime<br>min | Area<br>mAU*min | Height<br>mAU | Area<br>% | Height<br>% |
|------|----------------|-----------------|---------------|-----------|-------------|
| 1    | 11.563         | 46.524          | 88.122        | 97.30     | 98.88       |
| 2    | 22.637         | 1.293           | 0.999         | 2.70      | 1.12        |

$^1\text{H}$  NMR of **3l** (500 MHz,  $\text{CDCl}_3$ )

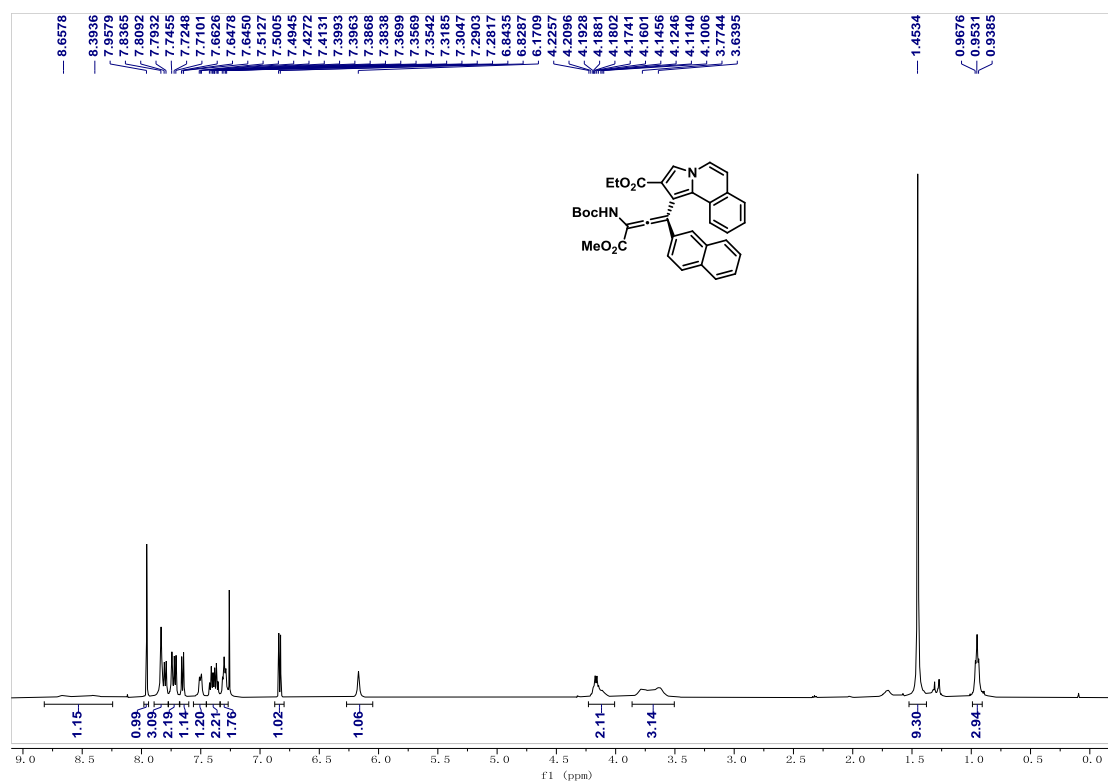

$^{13}\text{C}$  NMR of **3l** (126 MHz,  $\text{CDCl}_3$ )

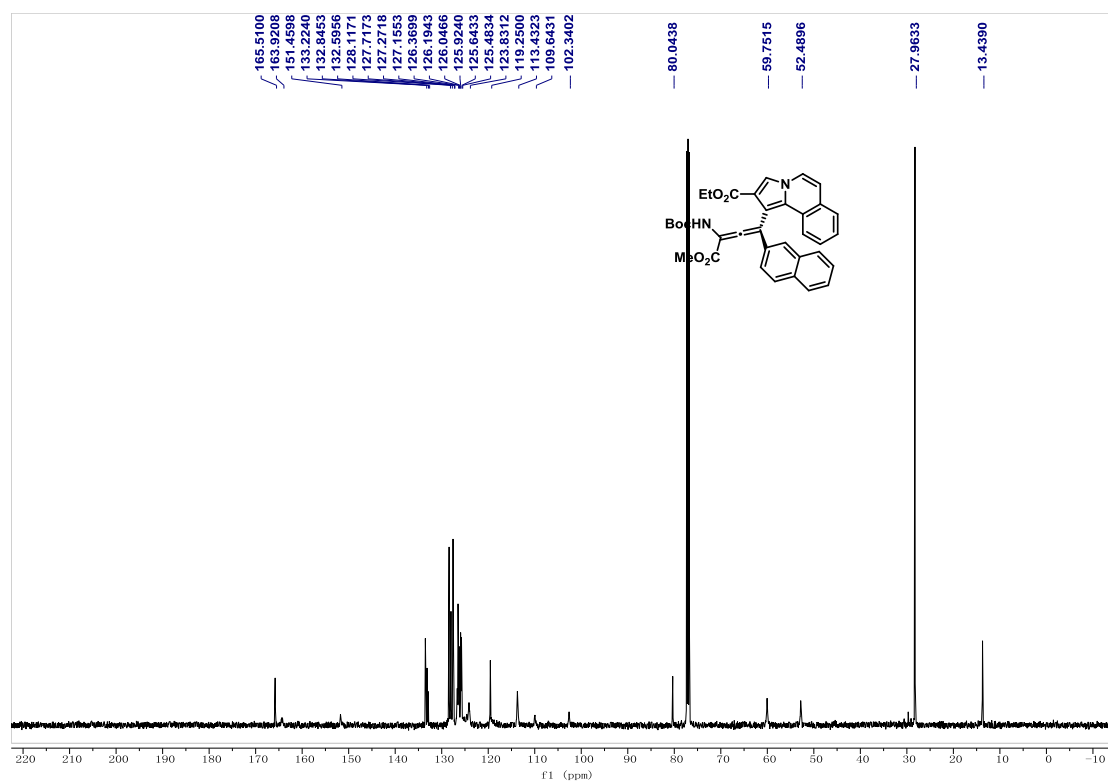

### HPLC analysis:rac-3I

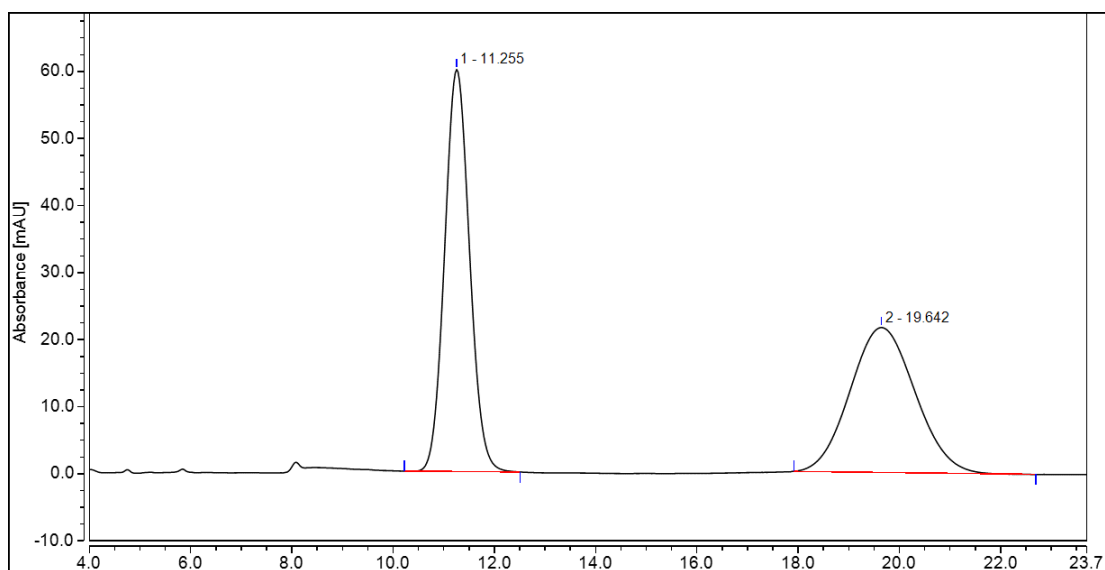

| Peak | RetTime<br>min | Area<br>mAU*min | Height<br>mAU | Area<br>% | Height<br>% |
|------|----------------|-----------------|---------------|-----------|-------------|
| 1    | 11.255         | 34.194          | 59.975        | 51.55     | 73.50       |
| 2    | 19.642         | 32.136          | 21.622        | 48.45     | 26.50       |

### Enantioenriched 3I

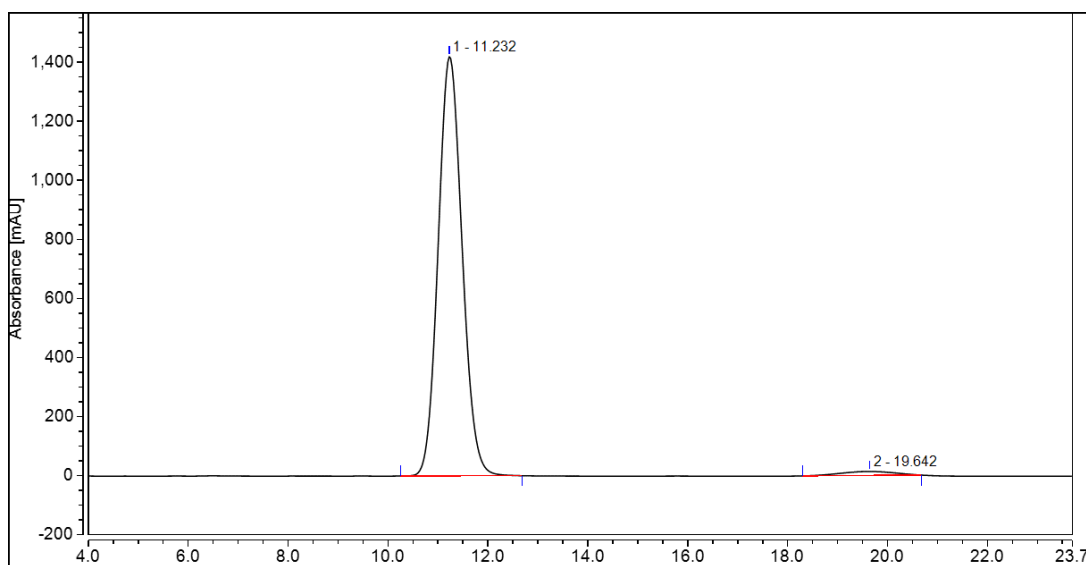

| Peak | RetTime<br>min | Area<br>mAU*min | Height<br>mAU | Area<br>% | Height<br>% |
|------|----------------|-----------------|---------------|-----------|-------------|
| 1    | 11.232         | 787.755         | 1420.100      | 97.90     | 99.06       |
| 2    | 19.642         | 16.925          | 13.506        | 2.10      | 0.94        |

$^1\text{H}$  NMR of **3m** (400 MHz,  $\text{CDCl}_3$ )

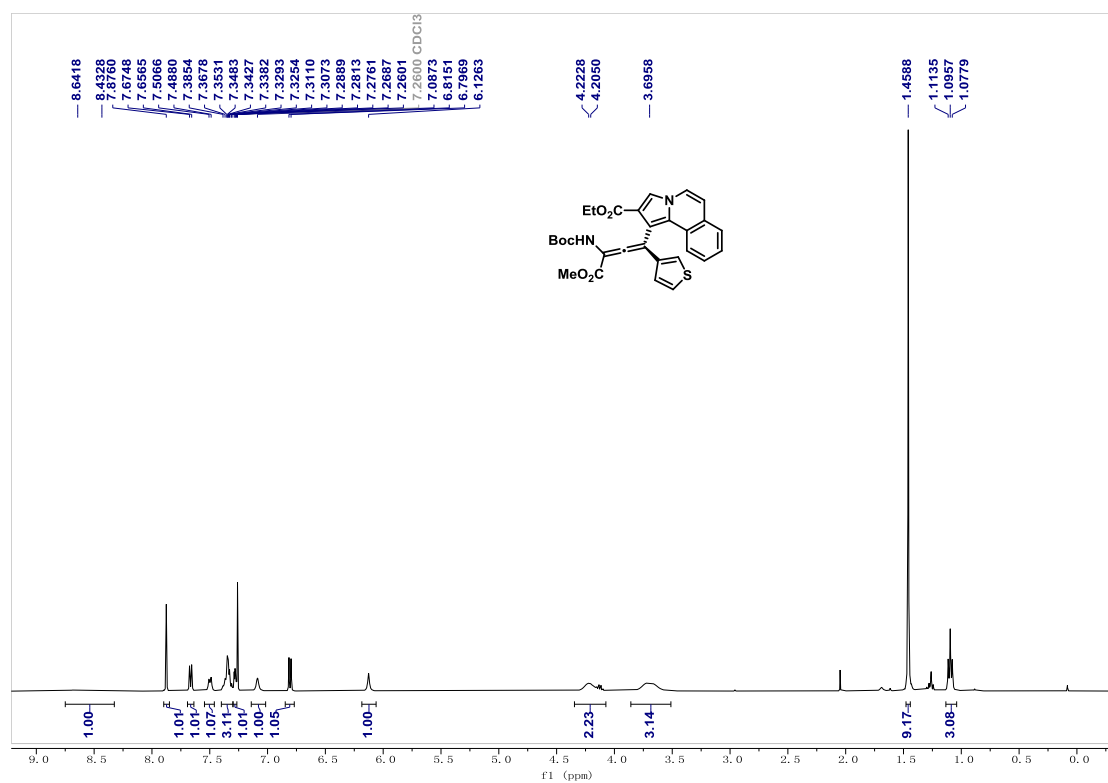

$^{13}\text{C}$  NMR of **3m** (101 MHz,  $\text{CDCl}_3$ )

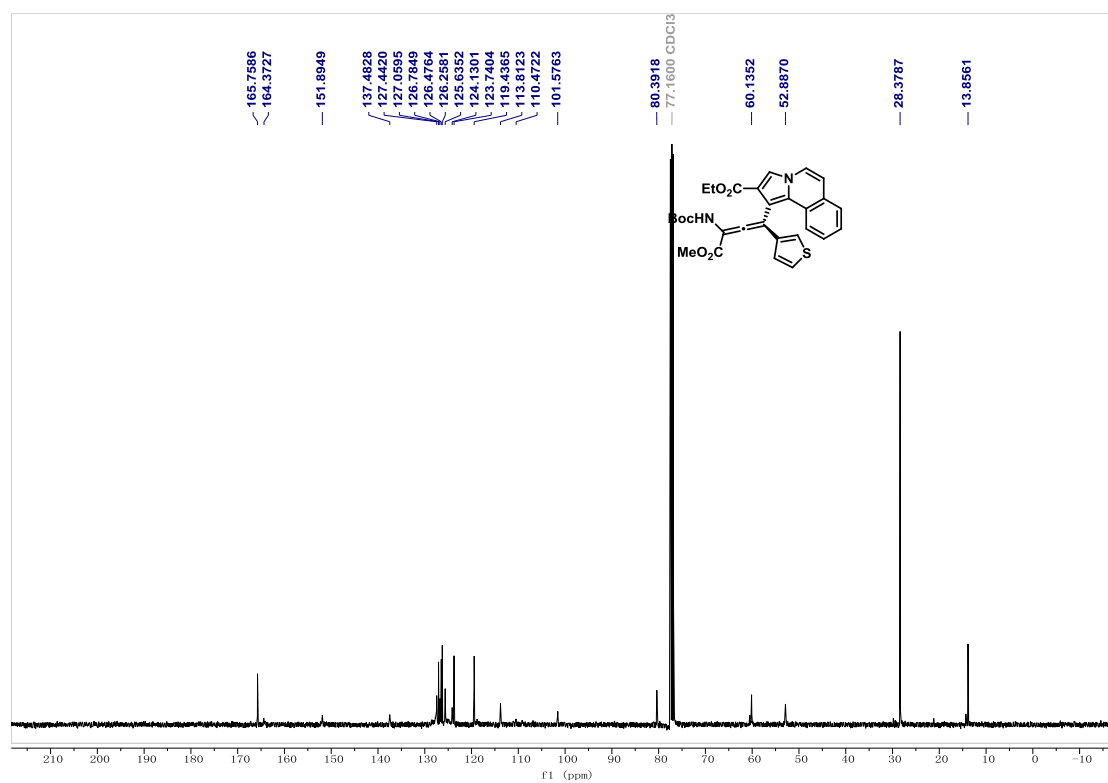

### HPLC analysis: rac-3m

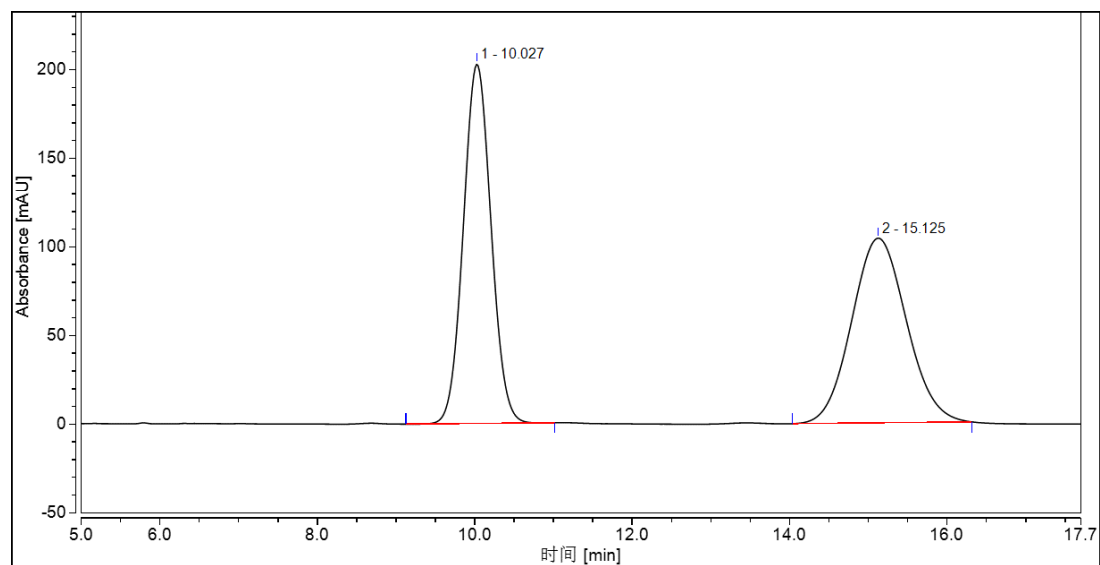

| Peak | RetTime<br>min | Area<br>mAU*min | Height<br>mAU | Area<br>% | Height<br>% |
|------|----------------|-----------------|---------------|-----------|-------------|
| 1    | 10.027         | 82.650          | 202.725       | 49.62     | 66.05       |
| 2    | 15.125         | 83.929          | 104.213       | 50.38     | 33.95       |

### Enantioenriched 3m

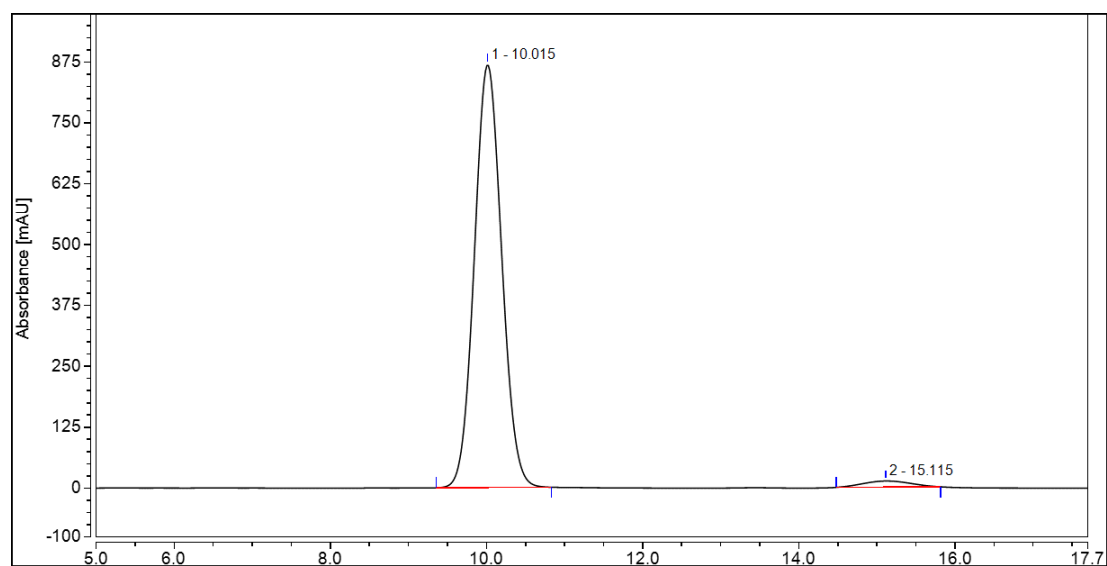

| Peak | RetTime<br>min | Area<br>mAU*min | Height<br>mAU | Area<br>% | Height<br>% |
|------|----------------|-----------------|---------------|-----------|-------------|
| 1    | 10.015         | 352.205         | 868.560       | 97.55     | 98.57       |
| 2    | 15.115         | 8.831           | 12.608        | 2.45      | 1.43        |

$^1\text{H}$  NMR of **3n** (400 MHz,  $\text{CDCl}_3$ )

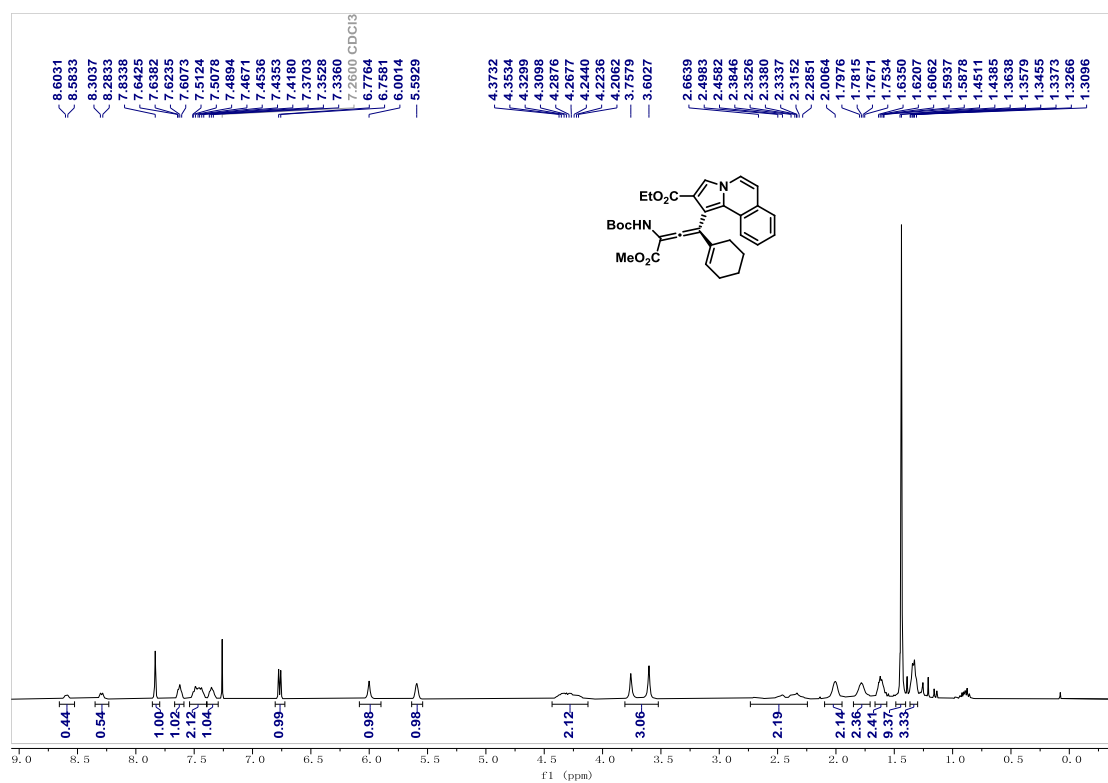

$^{13}\text{C}$  NMR of **3n** (101 MHz,  $\text{CDCl}_3$ )

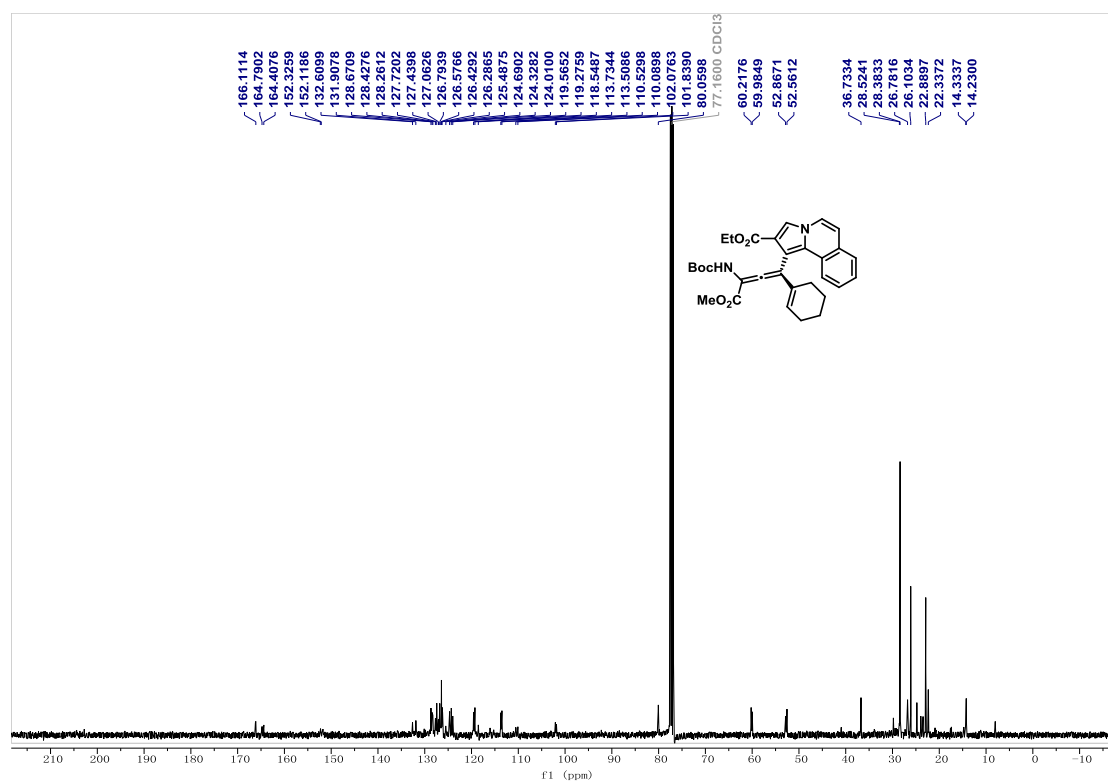

### HPLC analysis: rac-3n

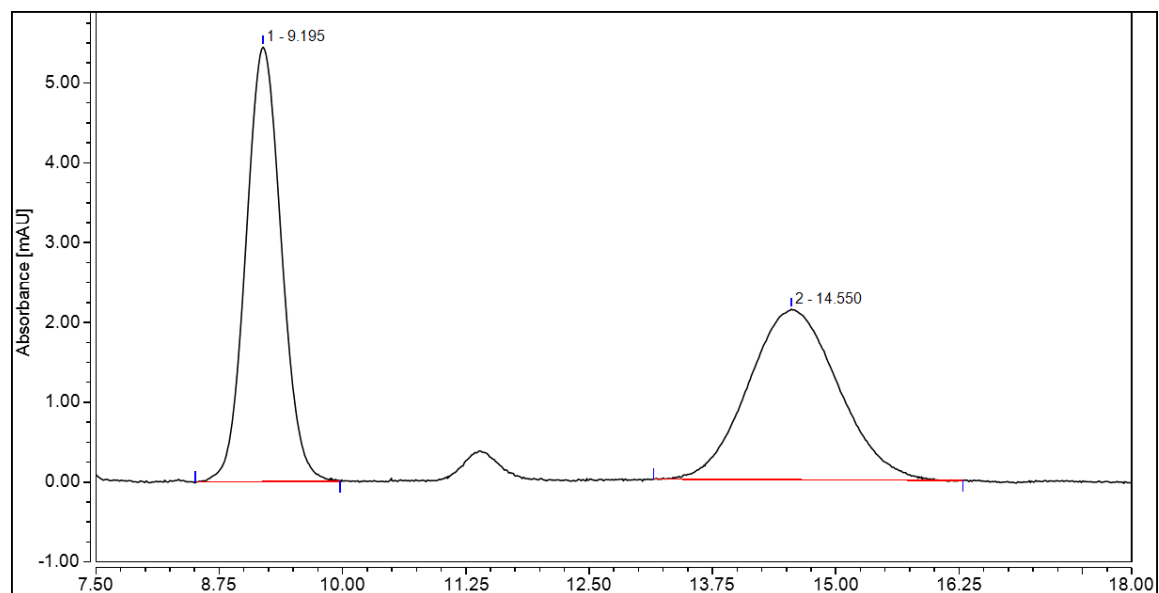

| Peak | RetTime<br>min | Area<br>mAU*min | Height<br>mAU | Area<br>% | Height<br>% |
|------|----------------|-----------------|---------------|-----------|-------------|
| 1    | 9.195          | 2.269           | 5.443         | 50.21     | 71.81       |
| 2    | 14.550         | 2.250           | 2.137         | 49.79     | 28.19       |

### Enantioenriched 3n

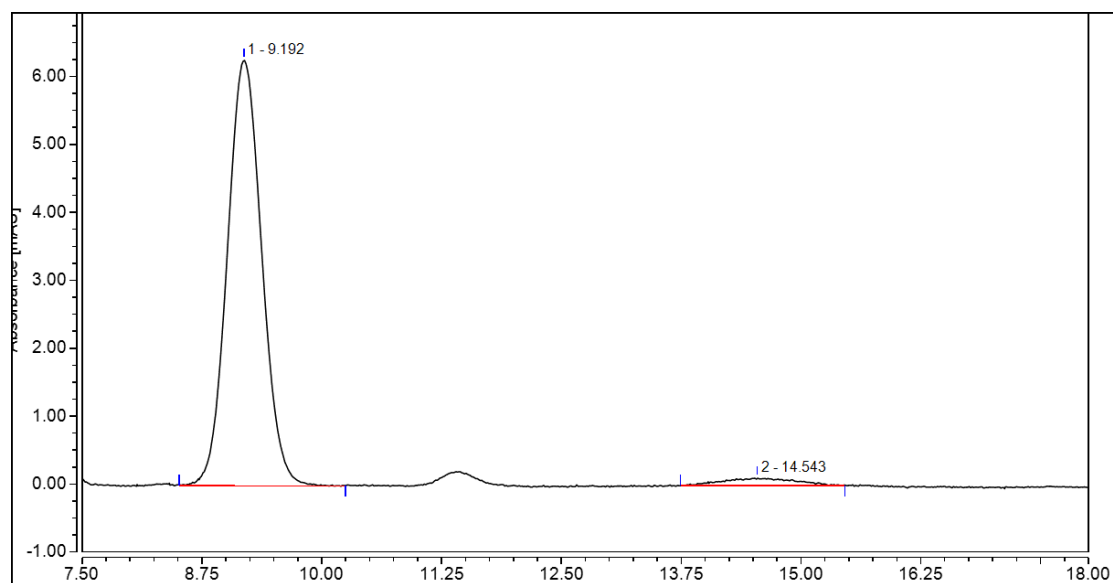

| Peak | RetTime<br>min | Area<br>mAU*min | Height<br>mAU | Area<br>% | Height<br>% |
|------|----------------|-----------------|---------------|-----------|-------------|
| 1    | 9.192          | 2.611           | 6.274         | 96.57     | 98.20       |
| 2    | 14.543         | 0.093           | 0.115         | 3.43      | 1.80        |

$^1\text{H}$  NMR of **3o** (500MHz,  $\text{CDCl}_3$ )

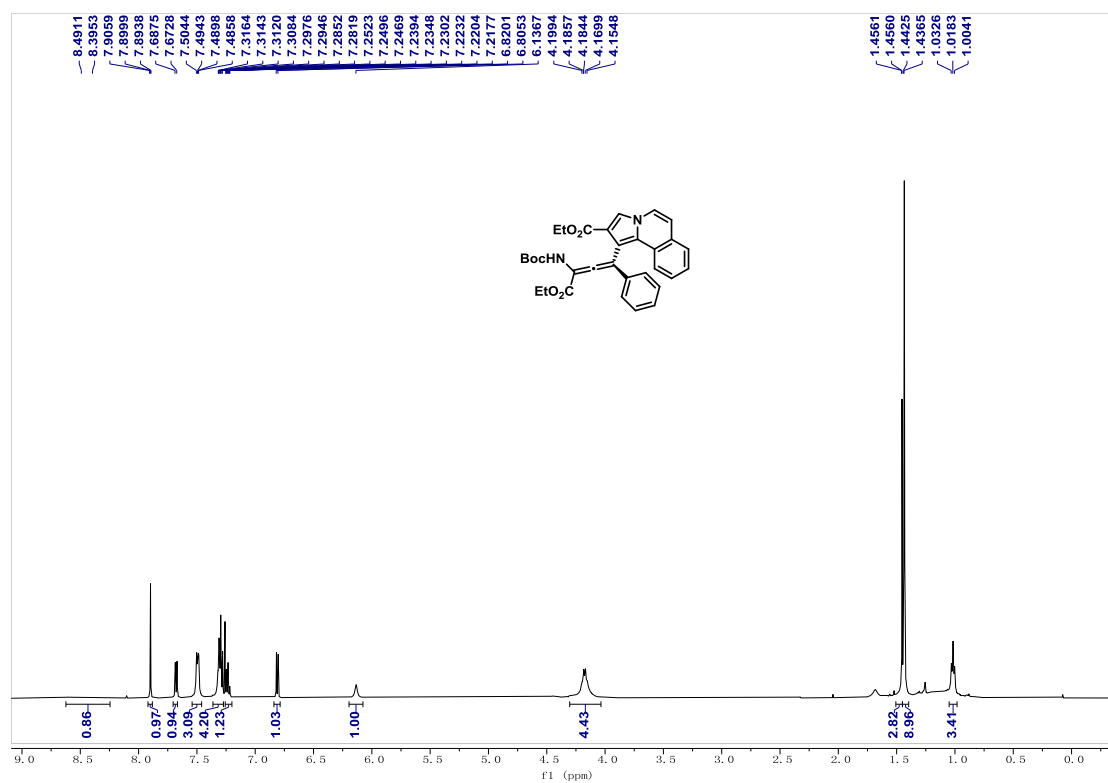

$^{13}\text{C}$  NMR of **3o** (126 MHz,  $\text{CDCl}_3$ )

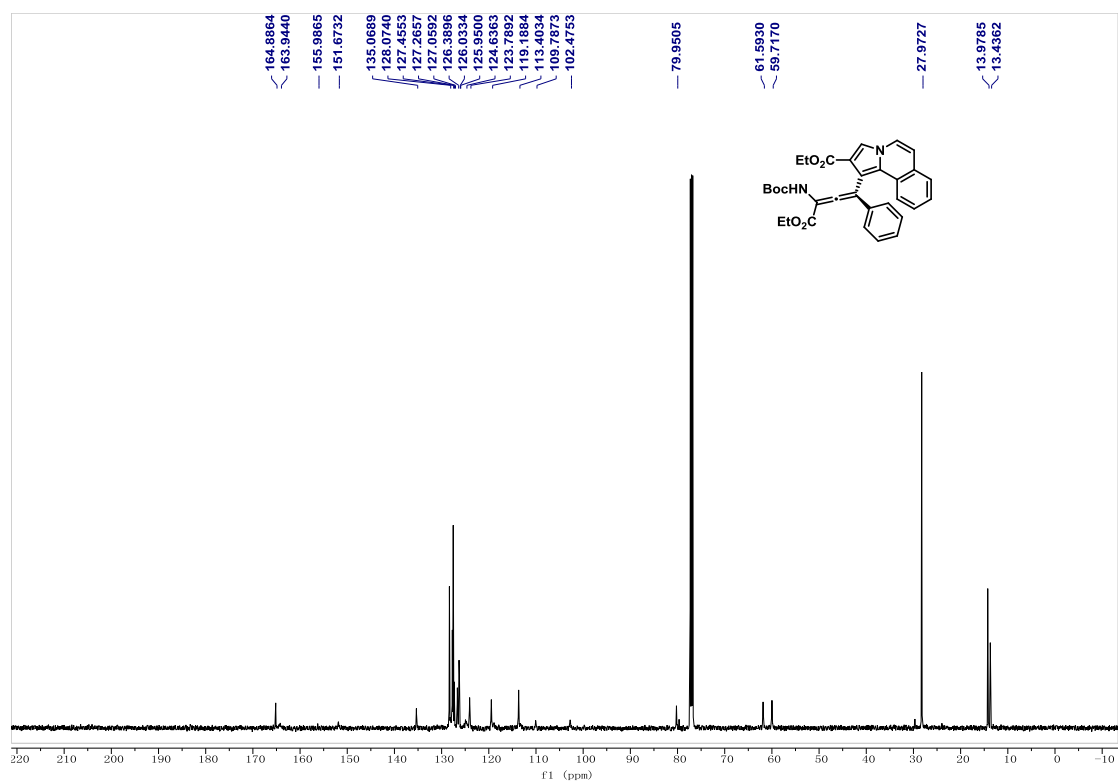

### HPLC analysis: rac-**3o**

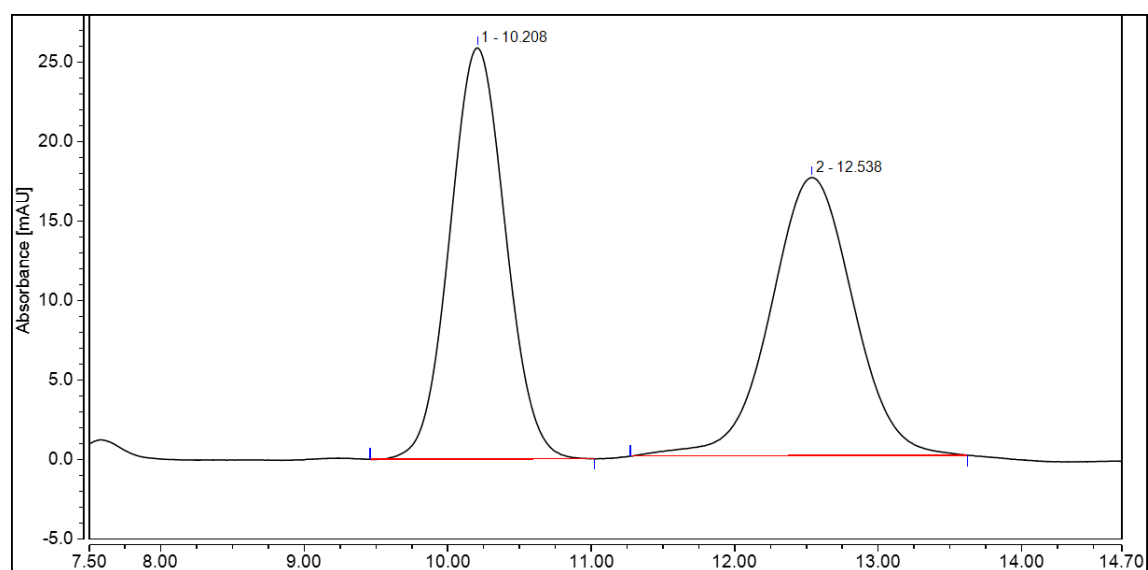

| Peak | RetTime<br>min | Area<br>mAU*min | Height<br>mAU | Area<br>% | Height<br>% |
|------|----------------|-----------------|---------------|-----------|-------------|
| 1    | 10.208         | 11.639          | 25.870        | 49.90     | 59.66       |
| 2    | 12.538         | 11.685          | 17.491        | 50.10     | 40.34       |

### Enantioenriched **3o**

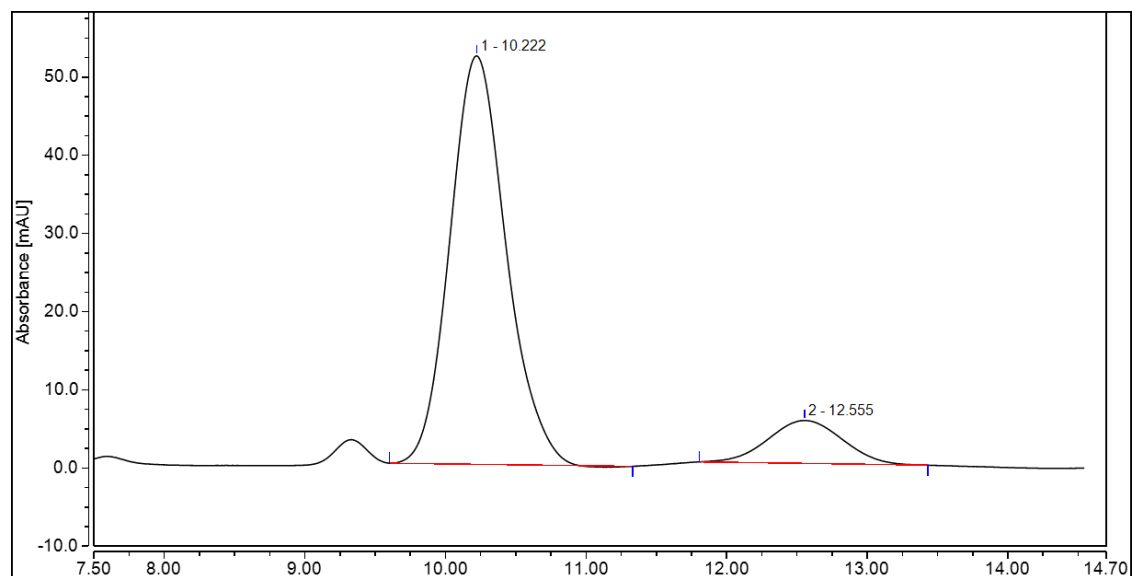

| Peak | RetTime<br>min | Area<br>mAU*min | Height<br>mAU | Area<br>% | Height<br>% |
|------|----------------|-----------------|---------------|-----------|-------------|
| 1    | 10.222         | 24.240          | 52.260        | 87.79     | 90.47       |
| 2    | 12.555         | 3.371           | 5.505         | 12.21     | 9.53        |

$^1\text{H}$  NMR of **3p** (400 MHz,  $\text{CDCl}_3$ )

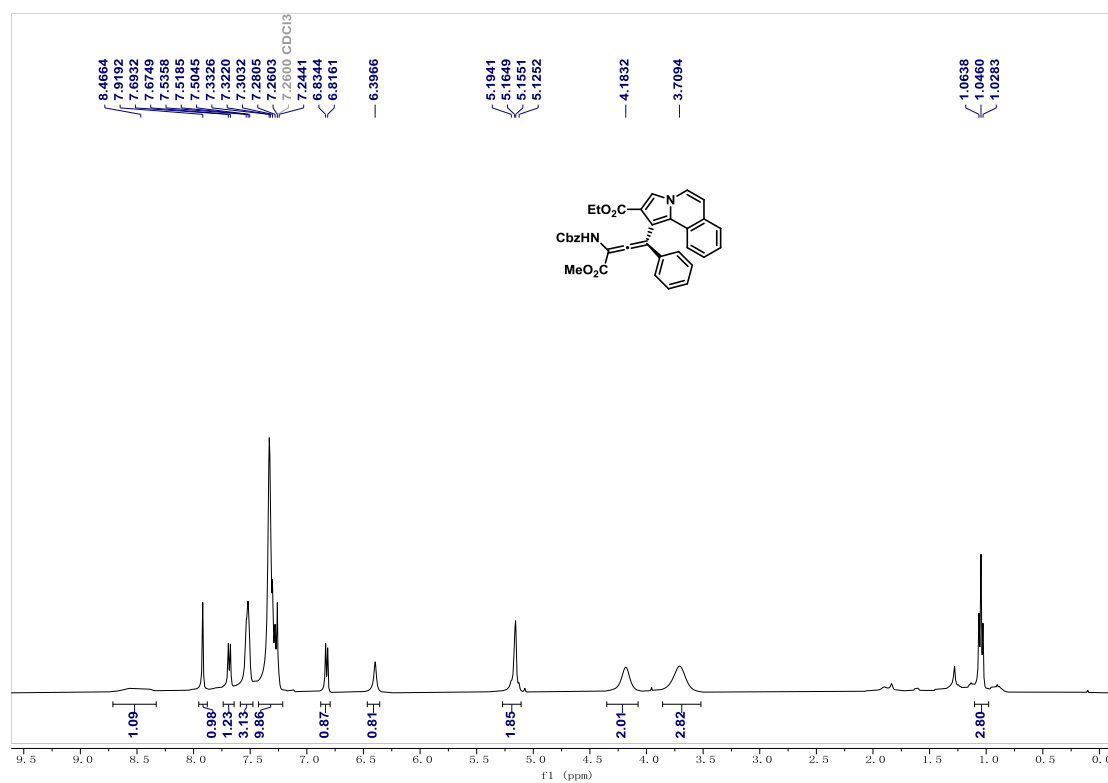

$^{13}\text{C}$  NMR of **3p** (101 MHz,  $\text{CDCl}_3$ )

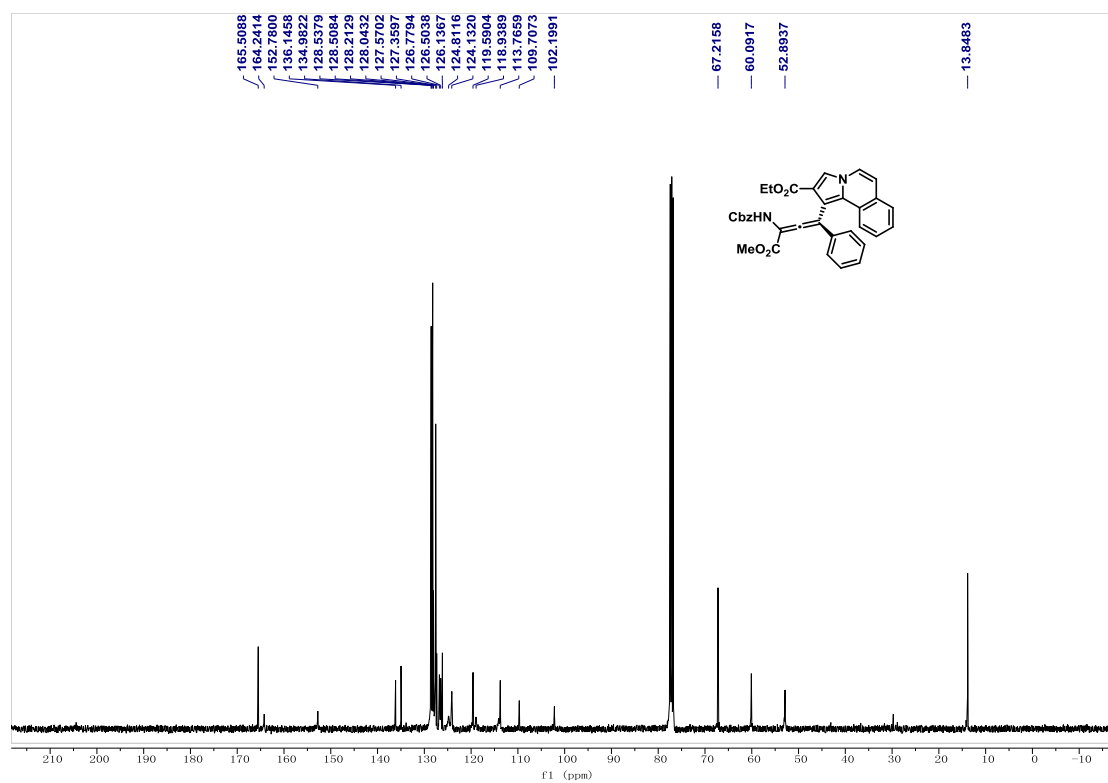

### HPLC analysis: rac-3p

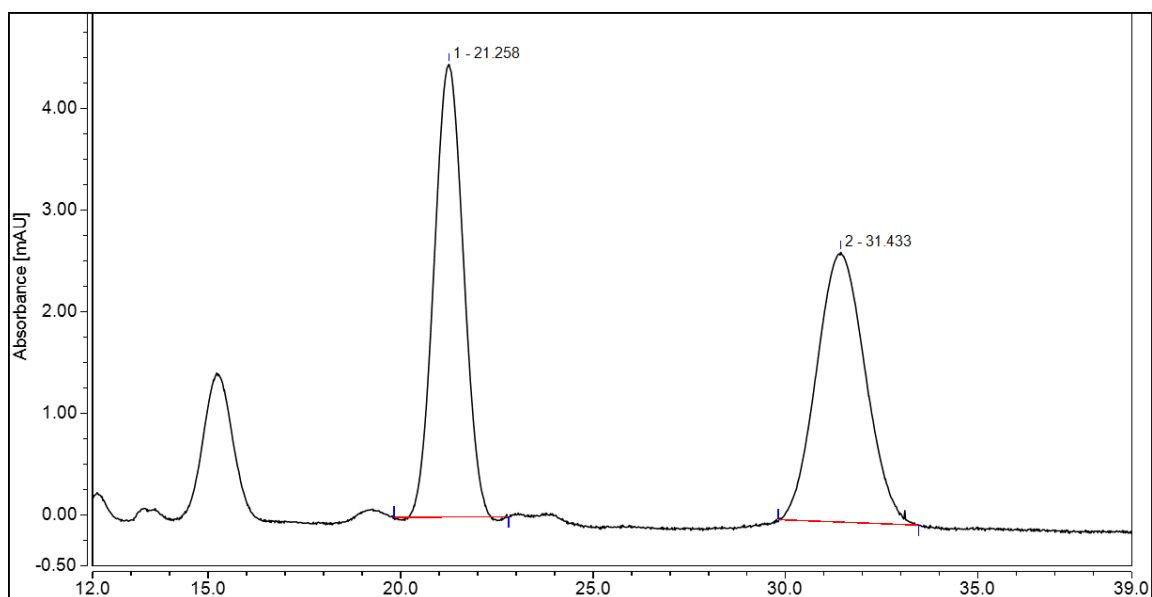

| Peak | RetTime<br>min | Area<br>mAU*min | Height<br>mAU | Area<br>% | Height<br>% |
|------|----------------|-----------------|---------------|-----------|-------------|
| 1    | 21.258         | 3.922           | 4.455         | 50.27     | 62.64       |
| 2    | 31.433         | 3.879           | 2.657         | 49.73     | 37.36       |

### Enantioenriched 3p

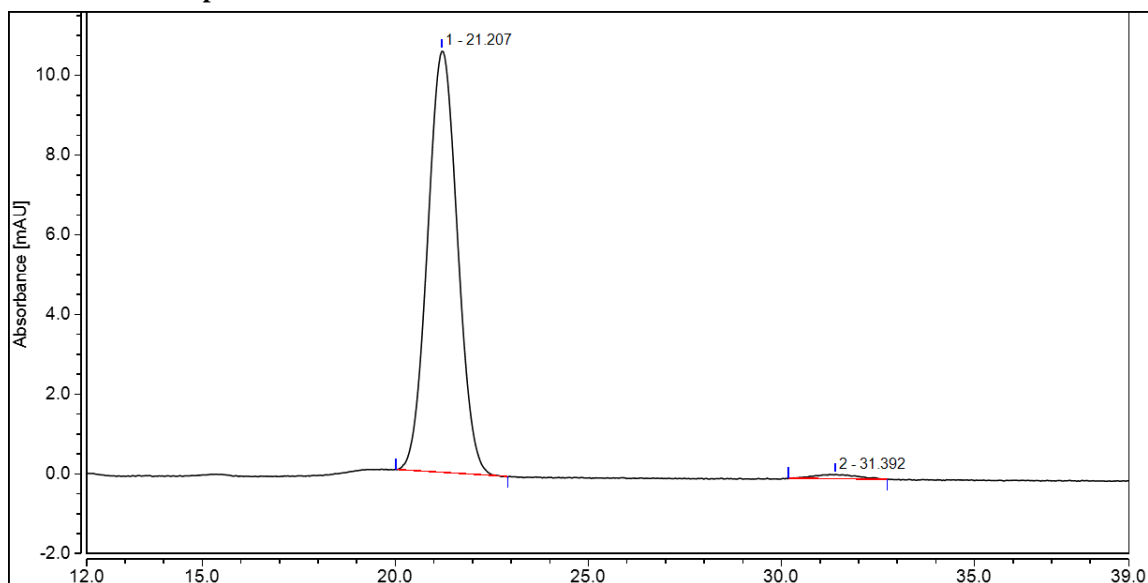

| Peak | RetTime<br>min | Area<br>mAU*min | Height<br>mAU | Area<br>% | Height<br>% |
|------|----------------|-----------------|---------------|-----------|-------------|
| 1    | 21.207         | 9.484           | 10.587        | 98.56     | 98.91       |
| 2    | 31.392         | 0.138           | 0.117         | 1.44      | 1.09        |

<sup>1</sup>H NMR of **3q** (400 MHz, CDCl<sub>3</sub>)

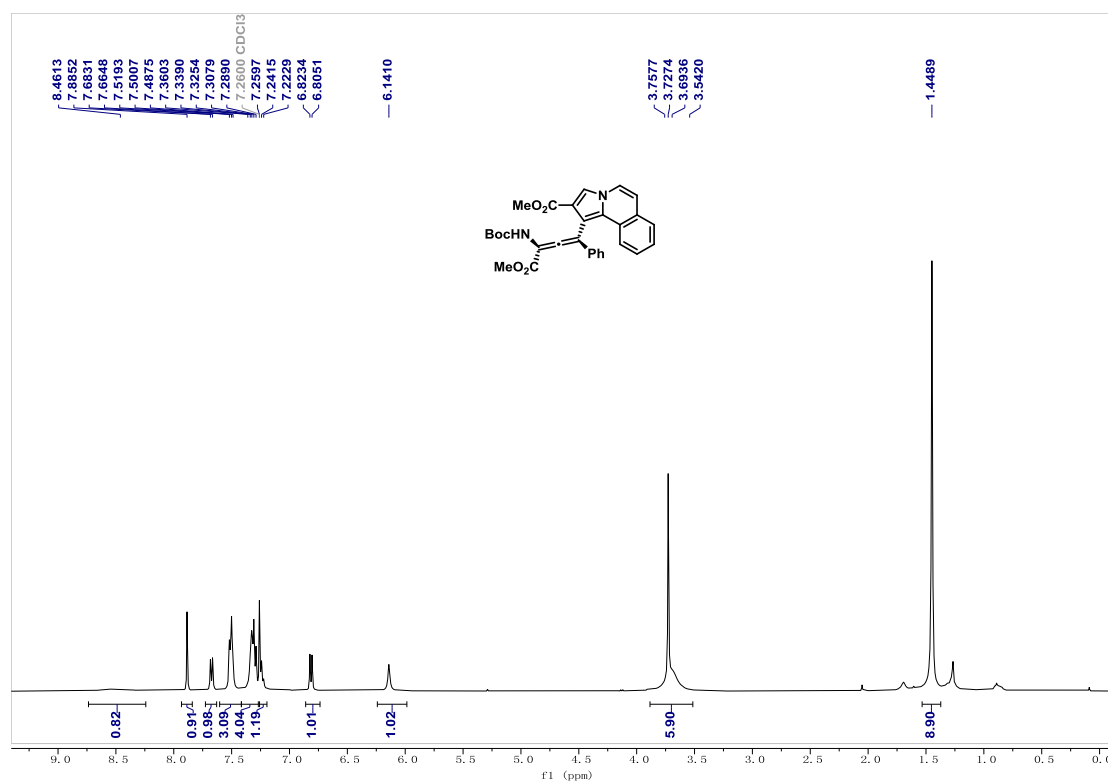

<sup>13</sup>C NMR of **3q** (101 MHz, CDCl<sub>3</sub>)

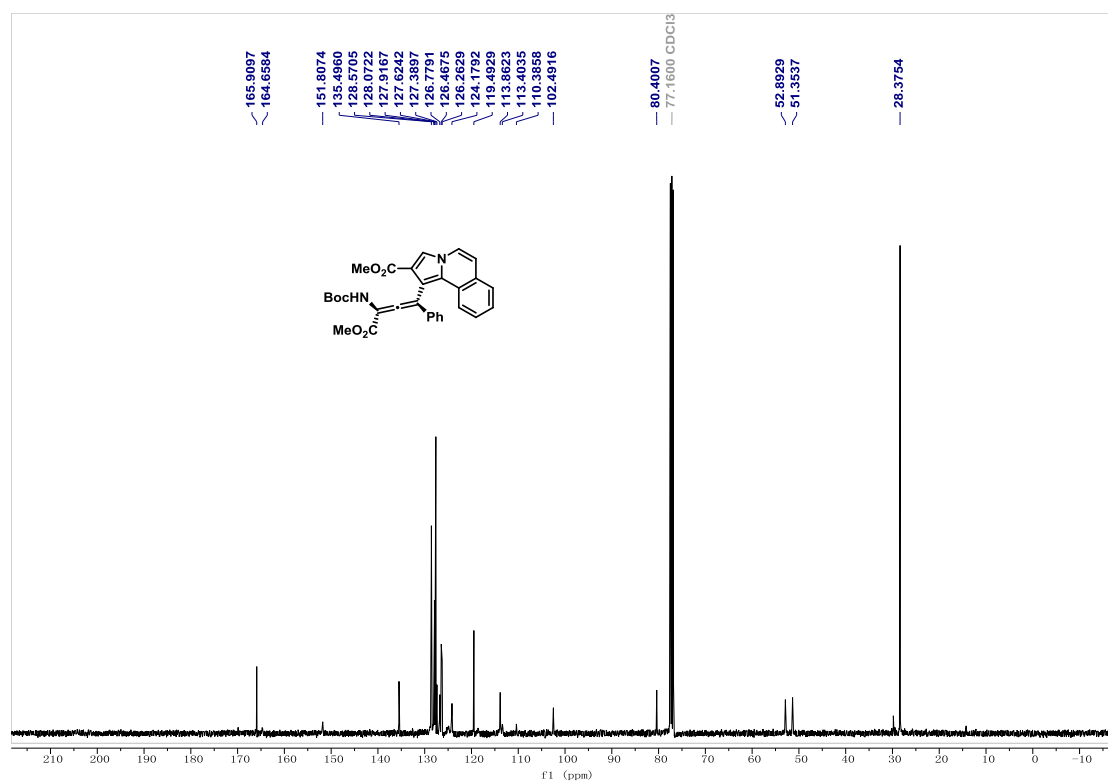

### HPLC analysis: rac-3q

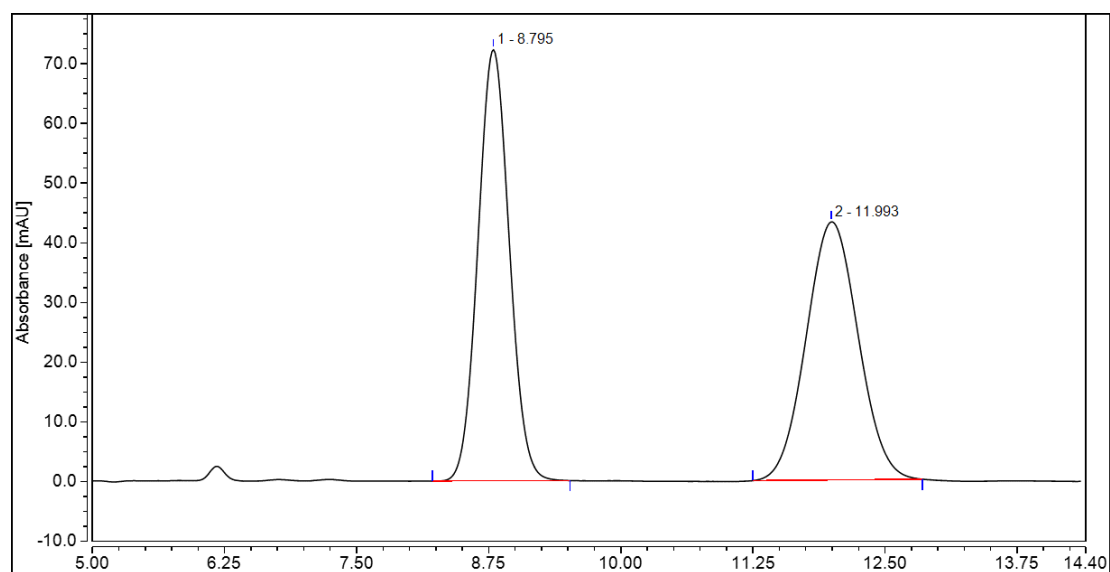

| Peak | RetTime<br>min | Area<br>mAU*min | Height<br>mAU | Area<br>% | Height<br>% |
|------|----------------|-----------------|---------------|-----------|-------------|
| 1    | 8.795          | 24.847          | 72.213        | 50.17     | 62.55       |
| 2    | 11.993         | 24.676          | 43.235        | 49.83     | 37.45       |

### Enantioenriched 3q

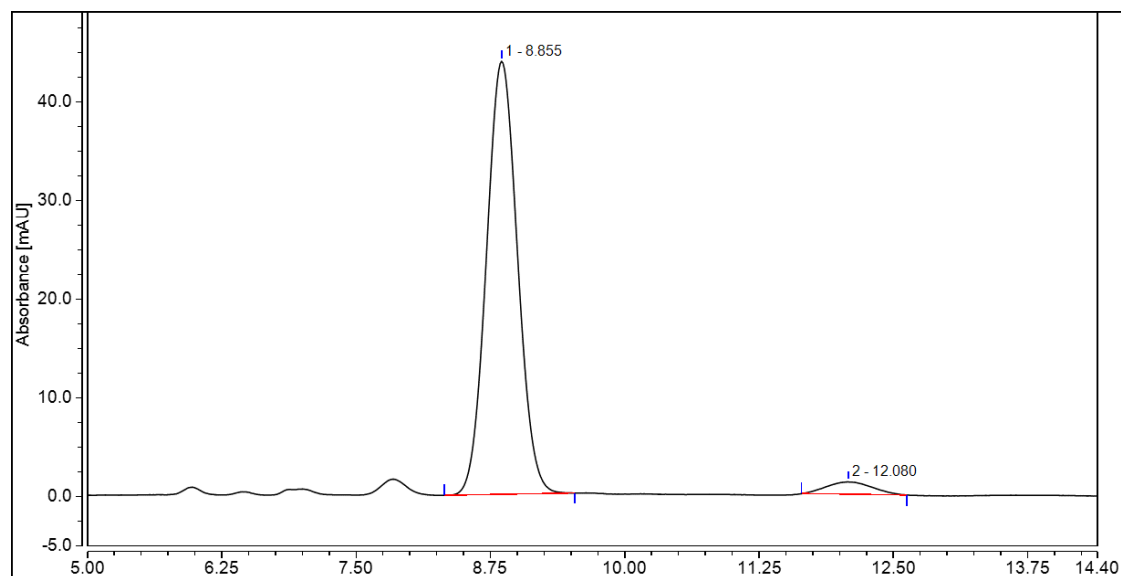

| Peak | RetTime<br>min | Area<br>mAU*min | Height<br>mAU | Area<br>% | Height<br>% |
|------|----------------|-----------------|---------------|-----------|-------------|
| 1    | 8.855          | 14.697          | 43.895        | 96.01     | 97.24       |
| 2    | 12.080         | 0.611           | 1.244         | 3.99      | 2.76        |

$^1\text{H}$  NMR of **3r** (500 MHz,  $\text{CDCl}_3$ )

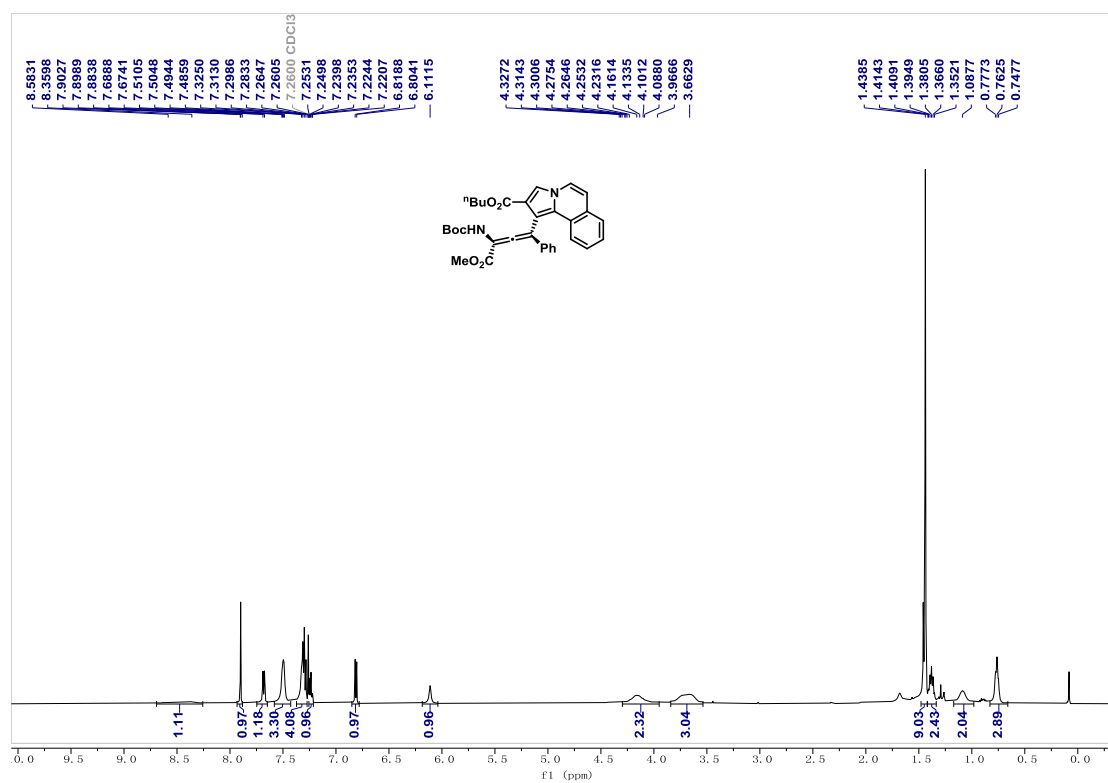

$^{13}\text{C}$  NMR of **3r** (126 MHz,  $\text{CDCl}_3$ )

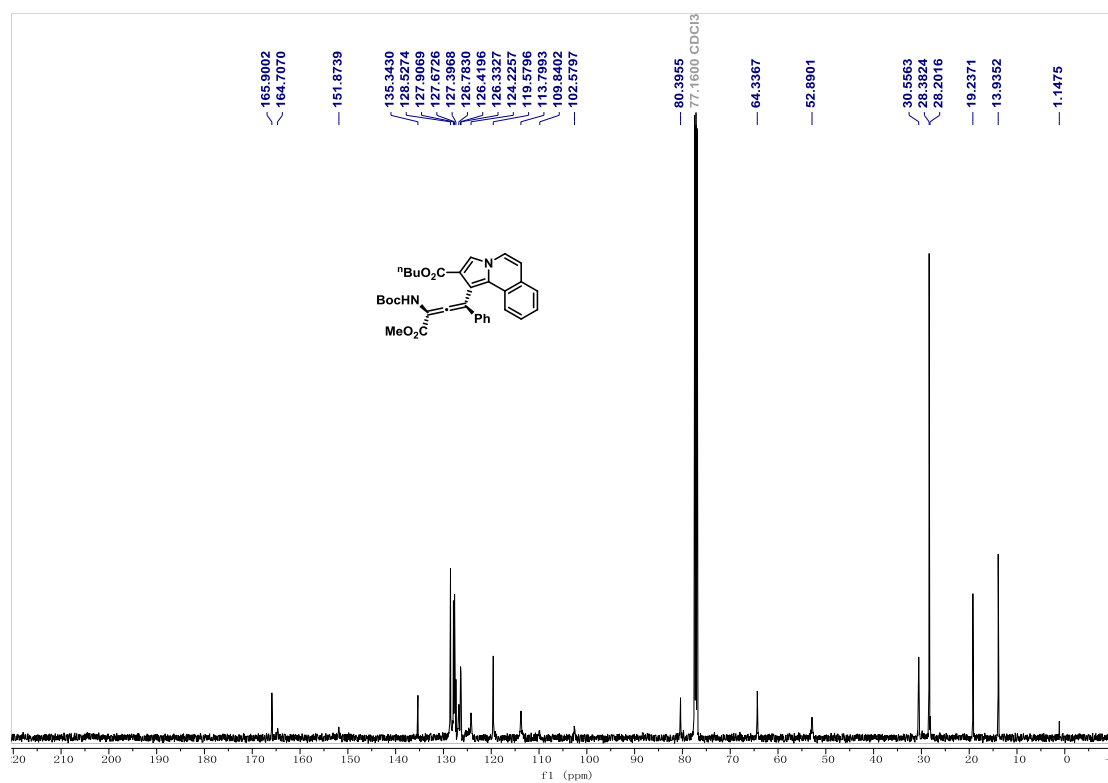

### HPLC analysis: rac-3r

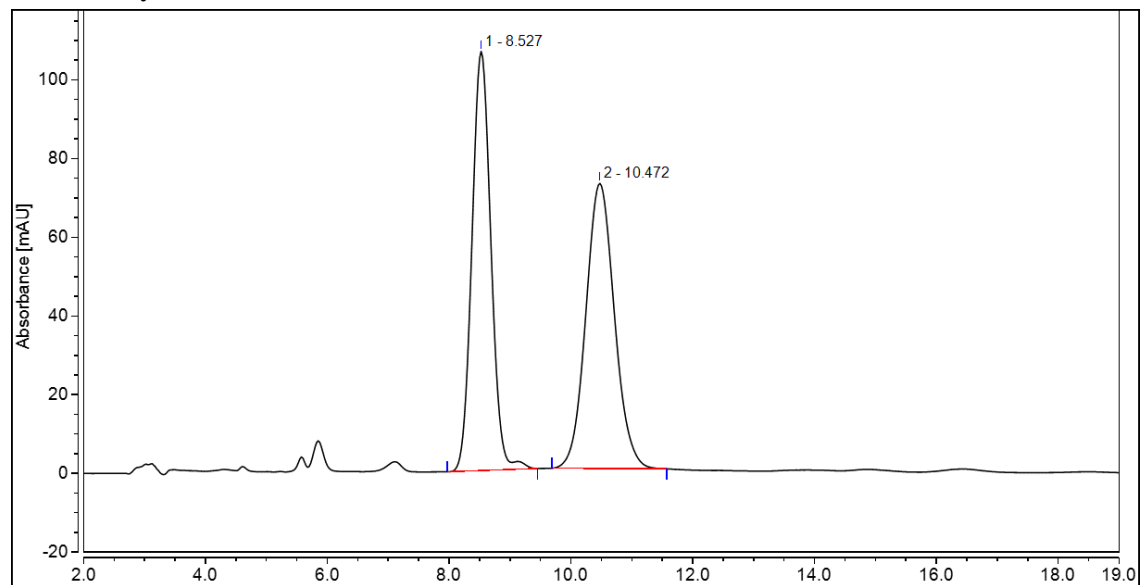

| Peak | RetTime<br>min | Area<br>mAU*min | Height<br>mAU | Area<br>% | Height<br>% |
|------|----------------|-----------------|---------------|-----------|-------------|
| 1    | 8.527          | 38.437          | 106.558       | 49.43     | 59.52       |
| 2    | 10.472         | 39.318          | 72.460        | 50.57     | 40.48       |

### Enantioenriched 3r

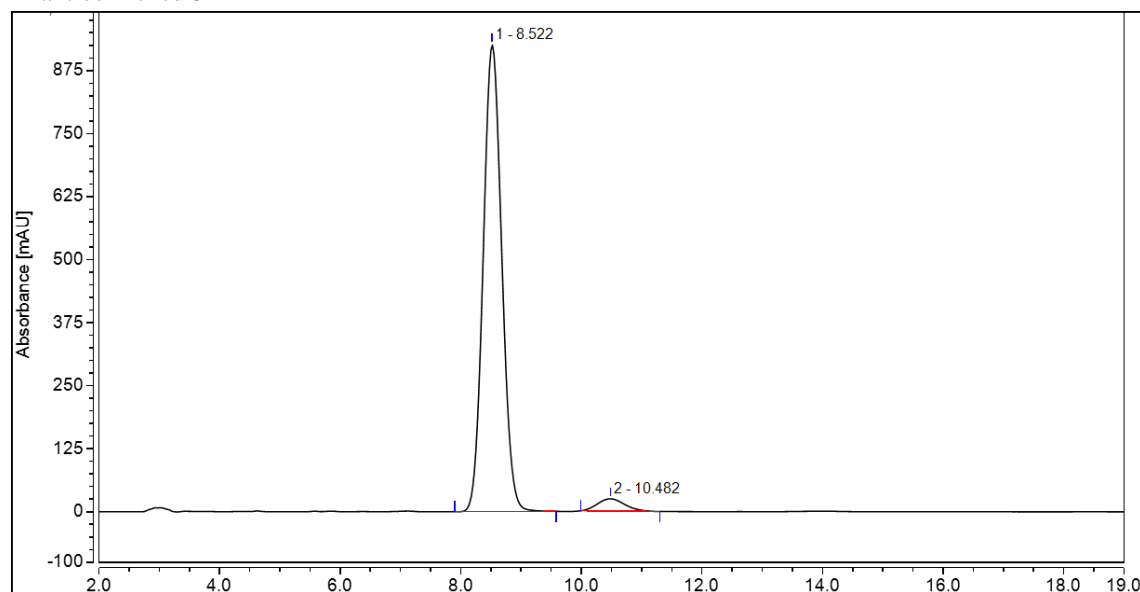

| Peak | RetTime<br>min | Area<br>mAU*min | Height<br>mAU | Area<br>% | Height<br>% |
|------|----------------|-----------------|---------------|-----------|-------------|
| 1    | 8.522          | 329.723         | 925.694       | 96.26     | 97.43       |
| 2    | 10.482         | 12.797          | 24.395        | 3.74      | 2.57        |

<sup>1</sup>H NMR of **3s** (500 MHz, CDCl<sub>3</sub>)

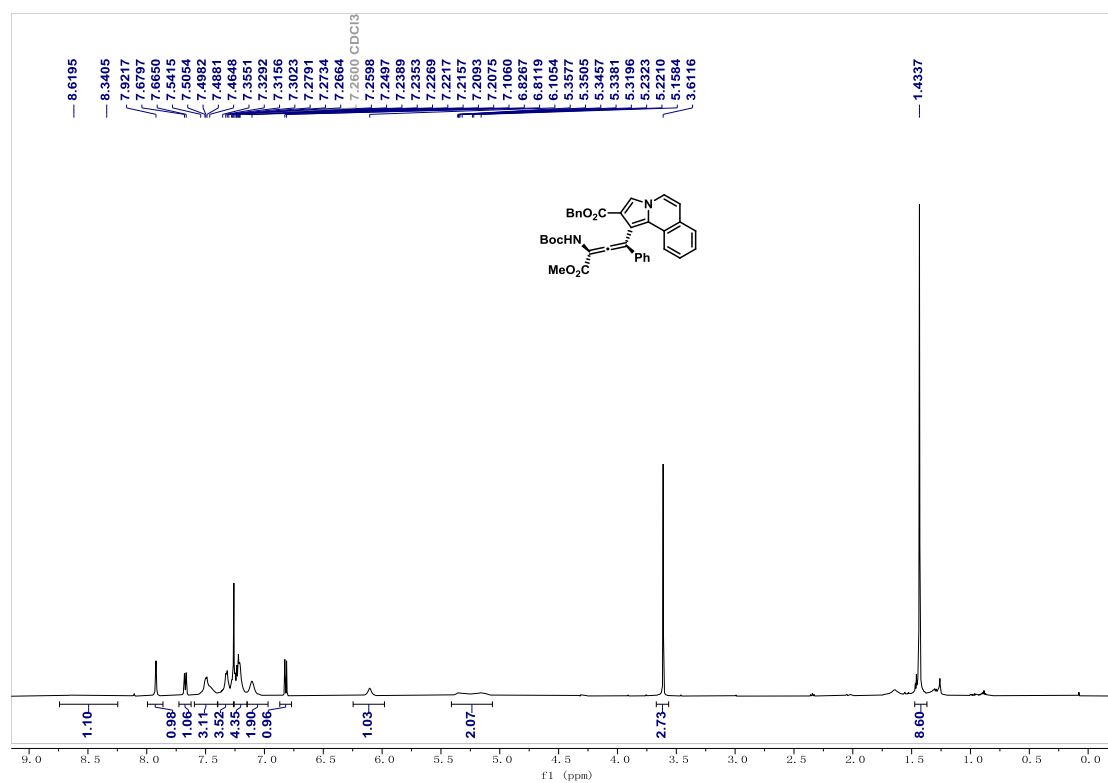

<sup>13</sup>C NMR of **3s** (126 MHz, CDCl<sub>3</sub>)

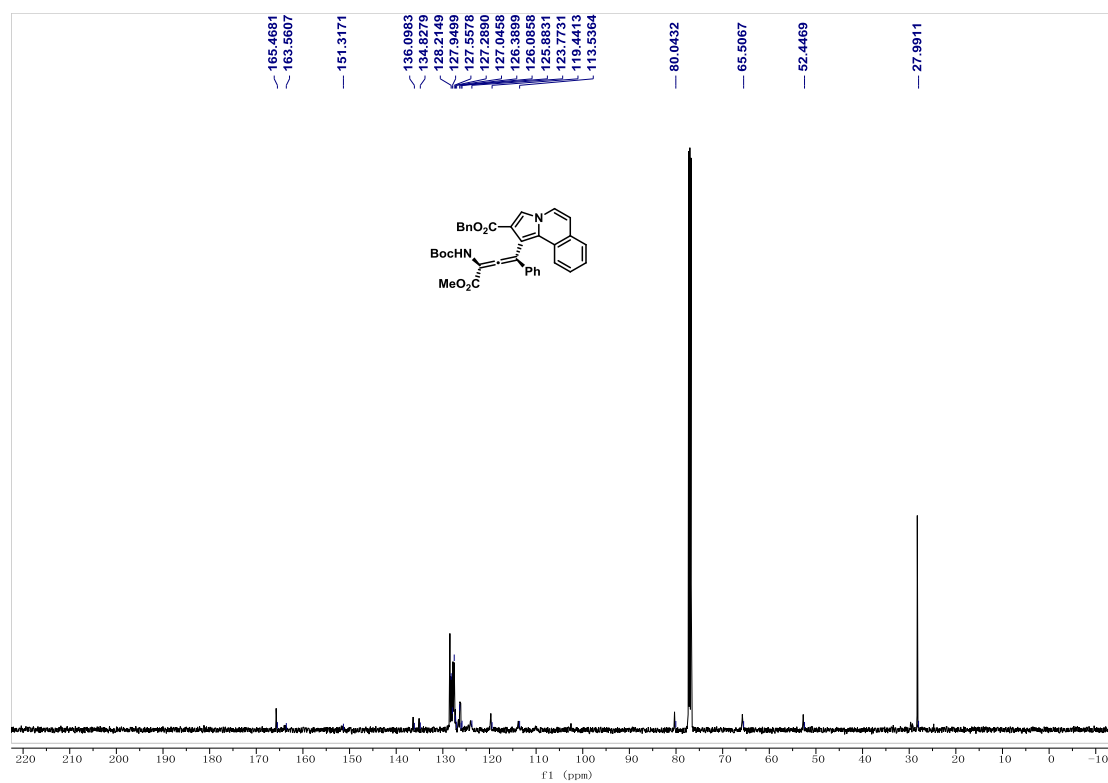

### HPLC analysis: rac-3s

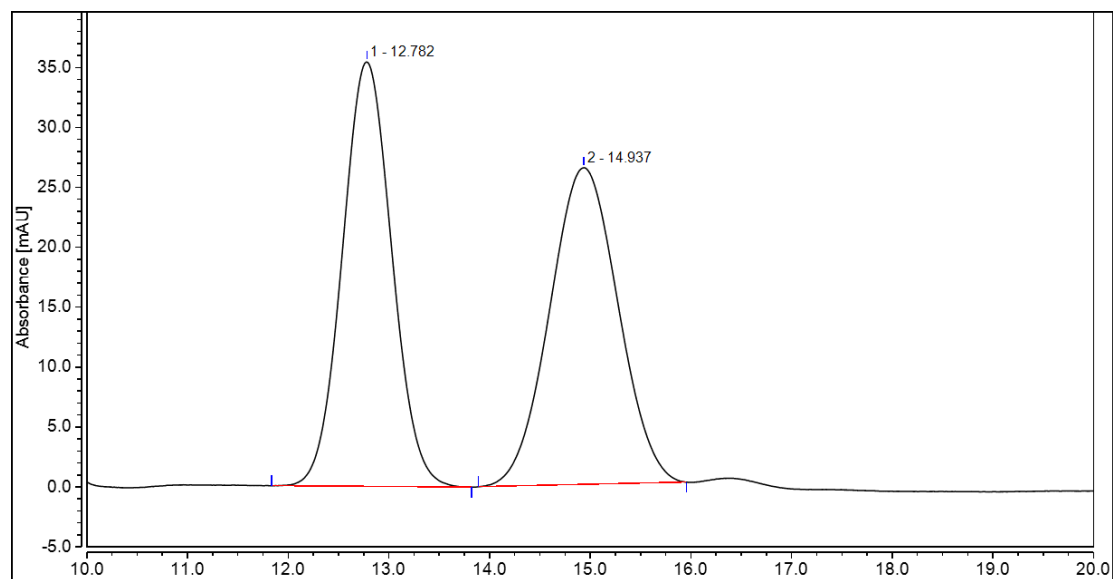

| Peak | RetTime<br>min | Area<br>mAU*min | Height<br>mAU | Area<br>% | Height<br>% |
|------|----------------|-----------------|---------------|-----------|-------------|
| 1    | 12.782         | 20.198          | 35.432        | 49.31     | 57.28       |
| 2    | 14.937         | 20.765          | 26.426        | 50.69     | 42.72       |

### Enantioenriched 3s

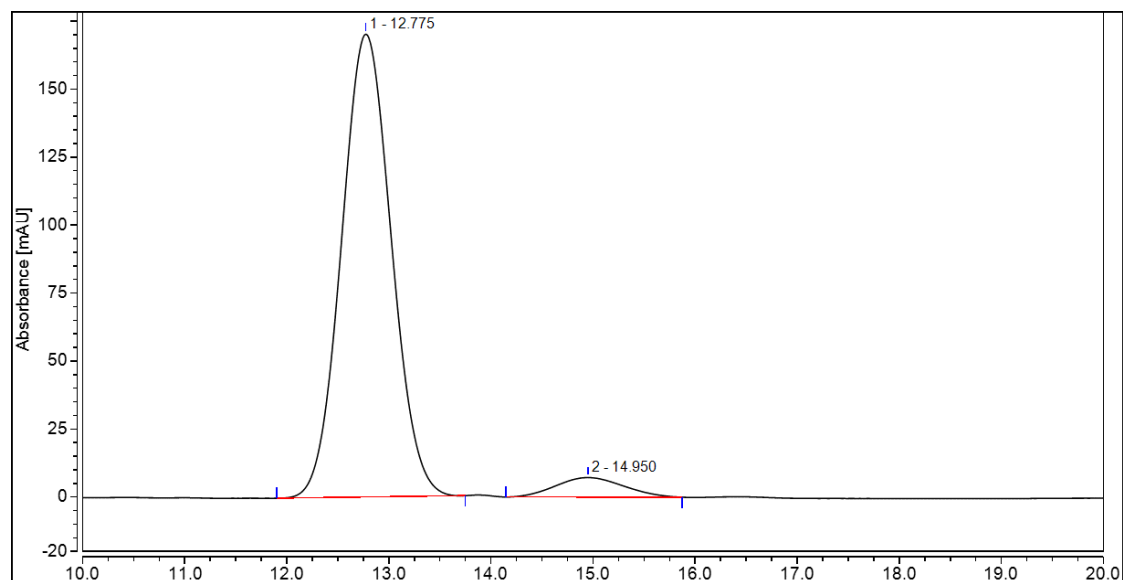

| Peak | RetTime<br>min | Area<br>mAU*min | Height<br>mAU | Area<br>% | Height<br>% |
|------|----------------|-----------------|---------------|-----------|-------------|
| 1    | 12.775         | 96.196          | 170.250       | 94.55     | 95.95       |
| 2    | 14.950         | 5.547           | 7.186         | 5.45      | 4.05        |

$^1\text{H}$  NMR of **3t** (400 MHz,  $\text{CDCl}_3$ )

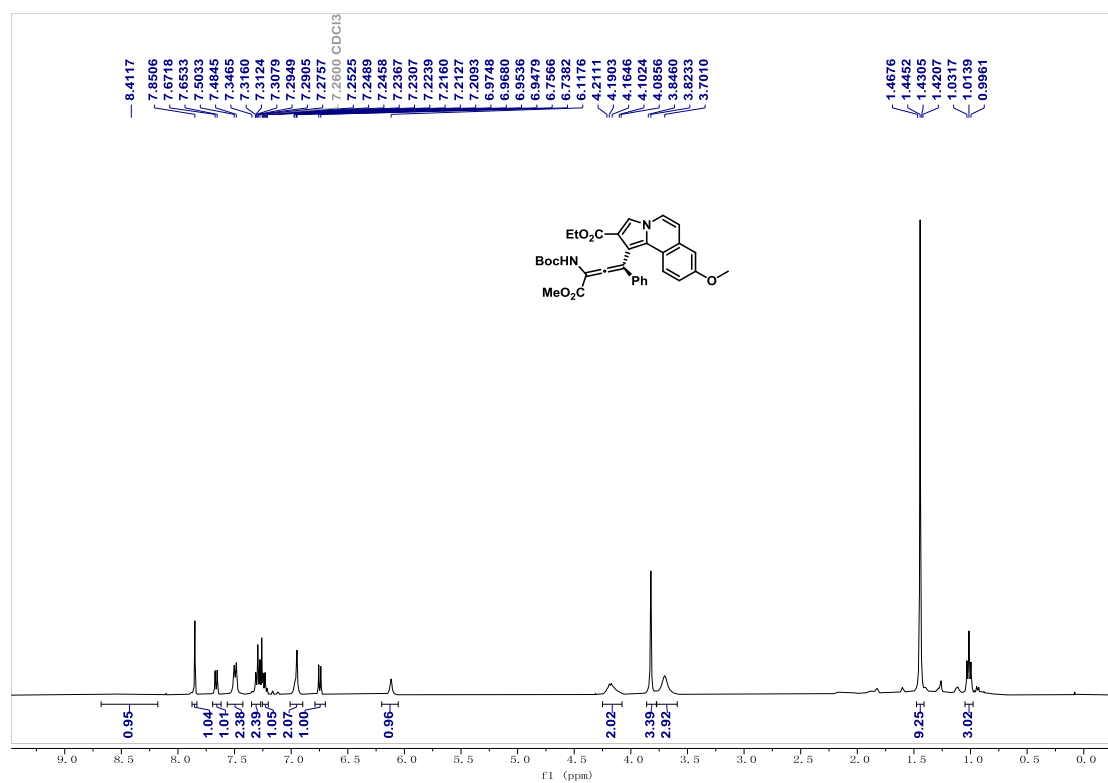

$^{13}\text{C}$  NMR of **3t** (101 MHz,  $\text{CDCl}_3$ )

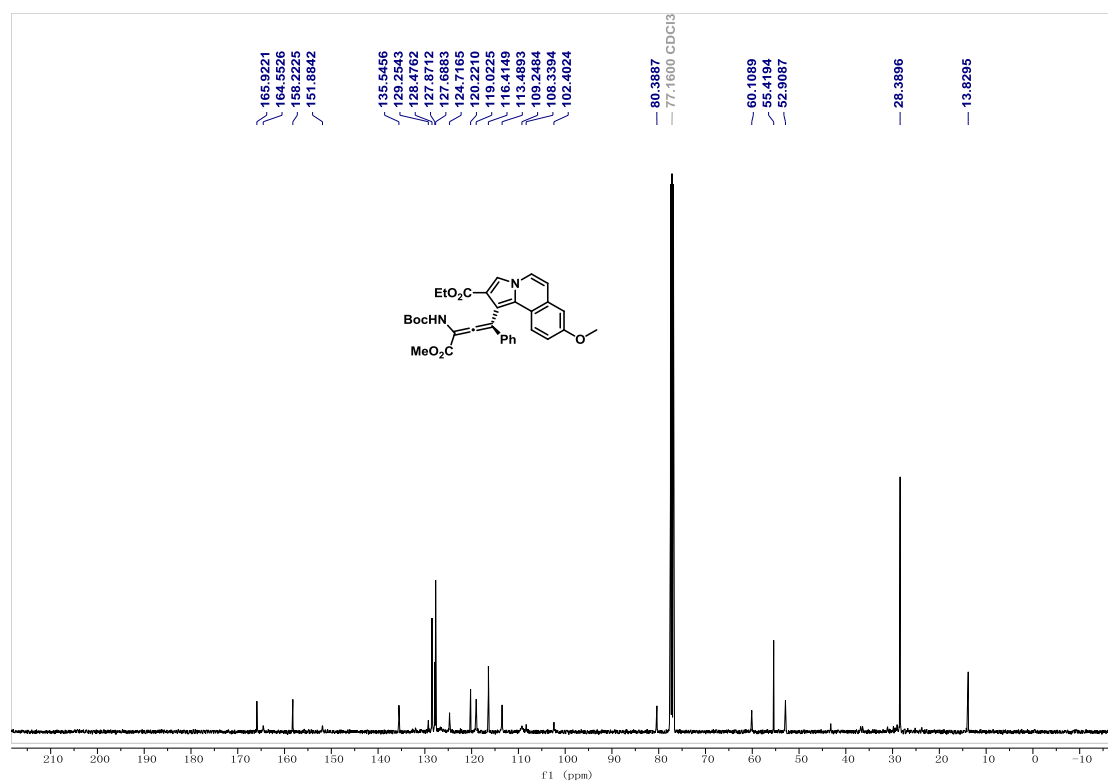

### HPLC analysis: rac-3t

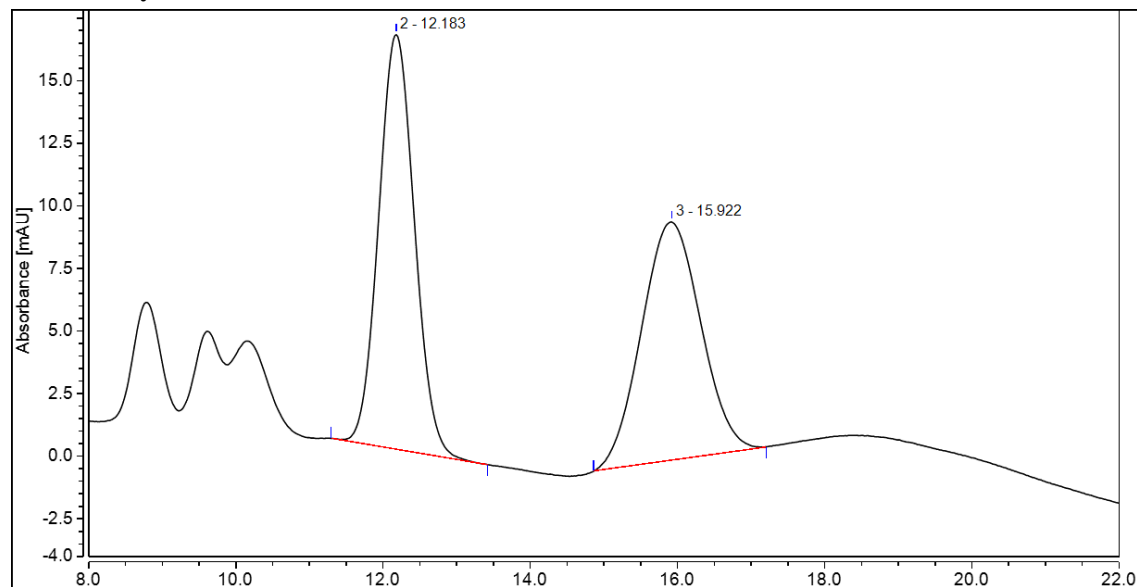

| Peak | RetTime<br>min | Area<br>mAU*min | Height<br>mAU | Area<br>% | Height<br>% |
|------|----------------|-----------------|---------------|-----------|-------------|
| 1    | 12.183         | 9.322           | 16.567        | 51.24     | 63.49       |
| 2    | 15.922         | 8.871           | 9.526         | 48.76     | 36.51       |

### Enantioenriched 3t

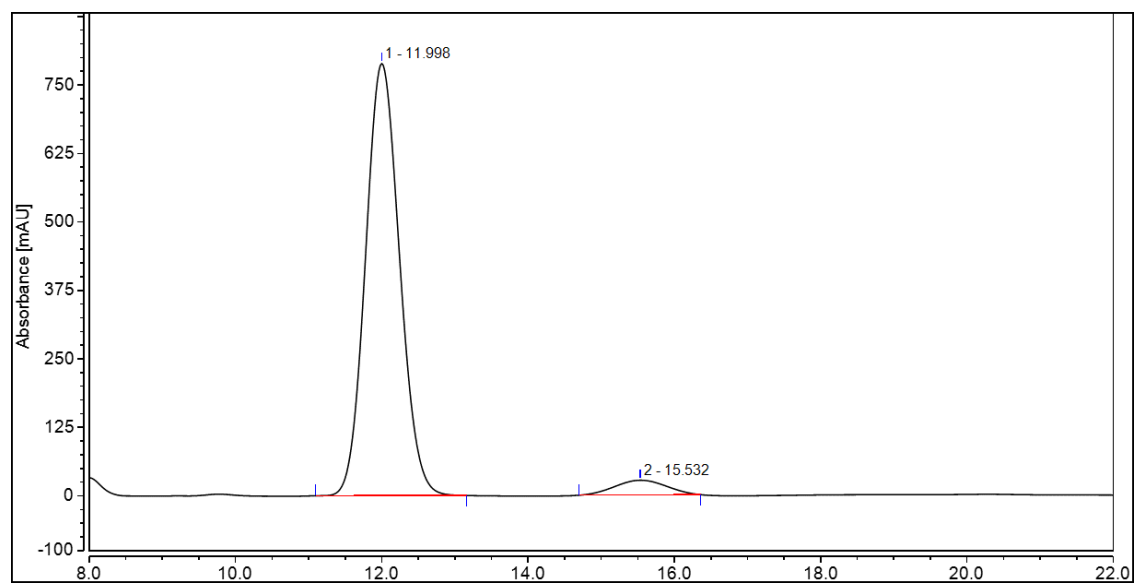

| Peak | RetTime<br>min | Area<br>mAU*min | Height<br>mAU | Area<br>% | Height<br>% |
|------|----------------|-----------------|---------------|-----------|-------------|
| 1    | 11.998         | 425.352         | 789.036       | 95.09     | 96.71       |
| 2    | 15.532         | 21.948          | 26.873        | 4.91      | 3.29        |

$^1\text{H}$  NMR of **3u** (400 MHz,  $\text{CDCl}_3$ )

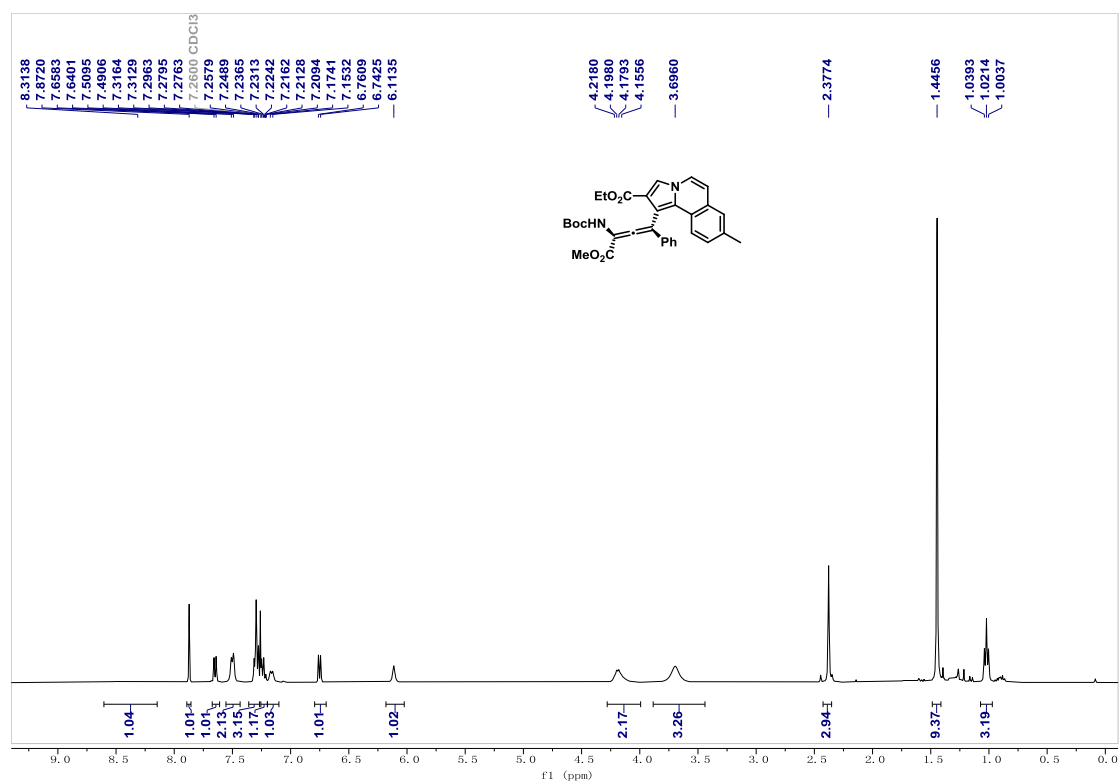

$^{13}\text{C}$  NMR of **3u** (101 MHz,  $\text{CDCl}_3$ )

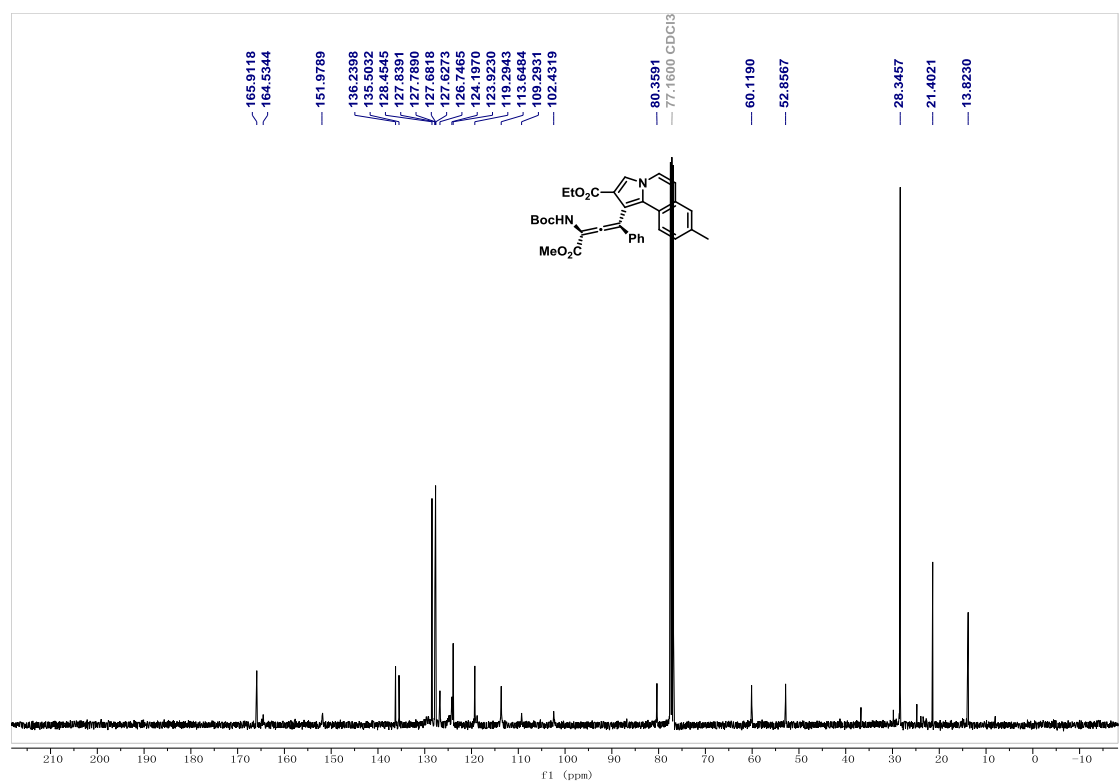

### HPLC analysis: rac-3u

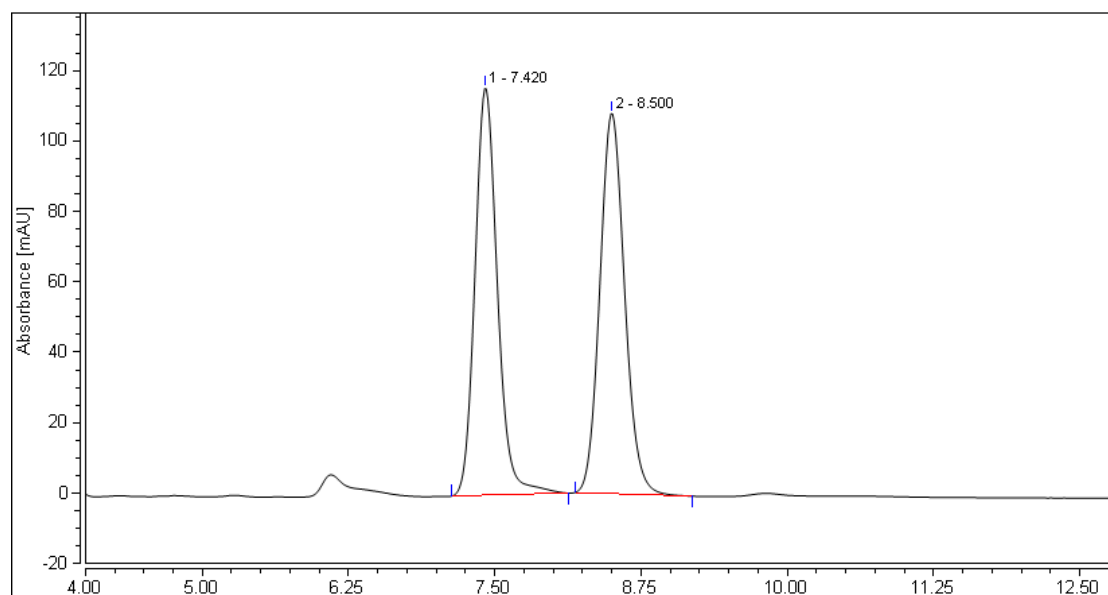

| Peak | RetTime<br>min | Area<br>mAU*min | Height<br>mAU | Area<br>% | Height<br>% |
|------|----------------|-----------------|---------------|-----------|-------------|
| 1    | 7.420          | 25.692          | 115.766       | 49.23     | 51.71       |
| 2    | 8.500          | 26.497          | 108.114       | 50.77     | 48.29       |

### Enantioenriched 3u

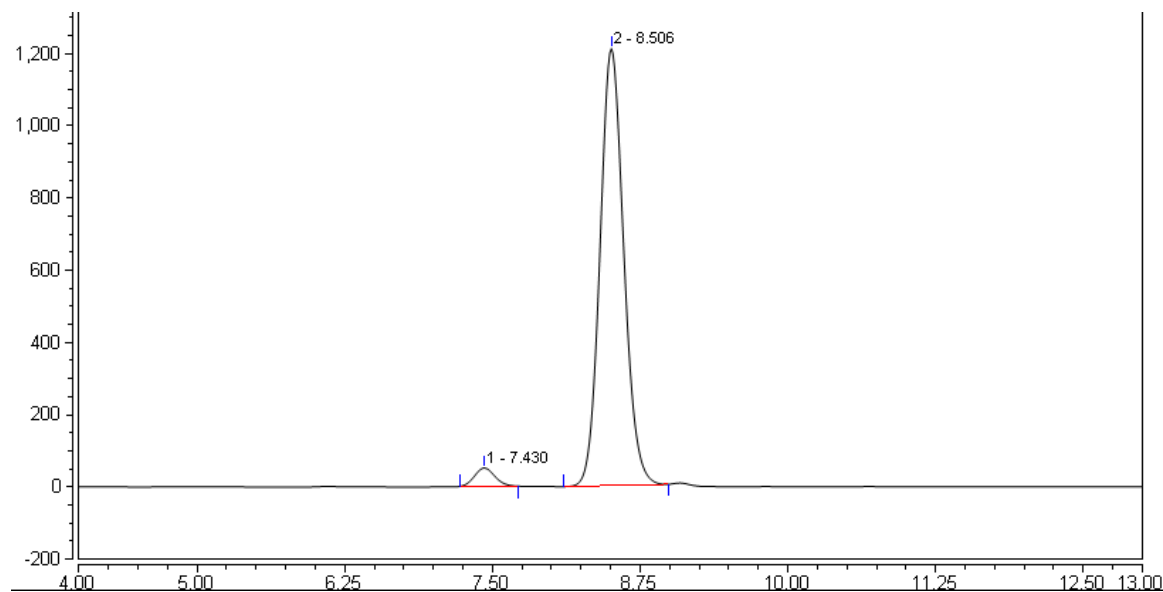

| Peak | RetTime<br>min | Area<br>mAU*min | Height<br>mAU | Area<br>% | Height<br>% |
|------|----------------|-----------------|---------------|-----------|-------------|
| 1    | 7.430          | 10.013          | 50.587        | 3.44      | 4.01        |
| 2    | 8.506          | 281.285         | 1210.553      | 96.56     | 95.99       |

<sup>1</sup>H NMR of **3v** (400 MHz, CDCl<sub>3</sub>)

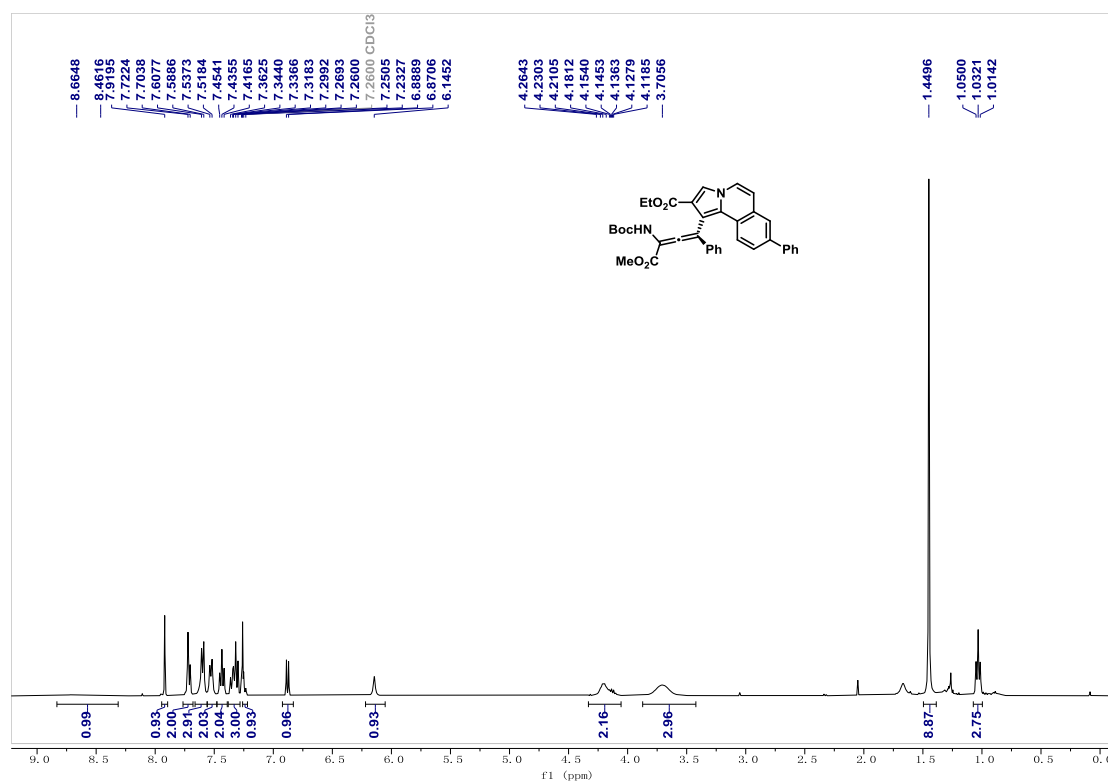

<sup>13</sup>C NMR of **3v** (101 MHz, CDCl<sub>3</sub>)

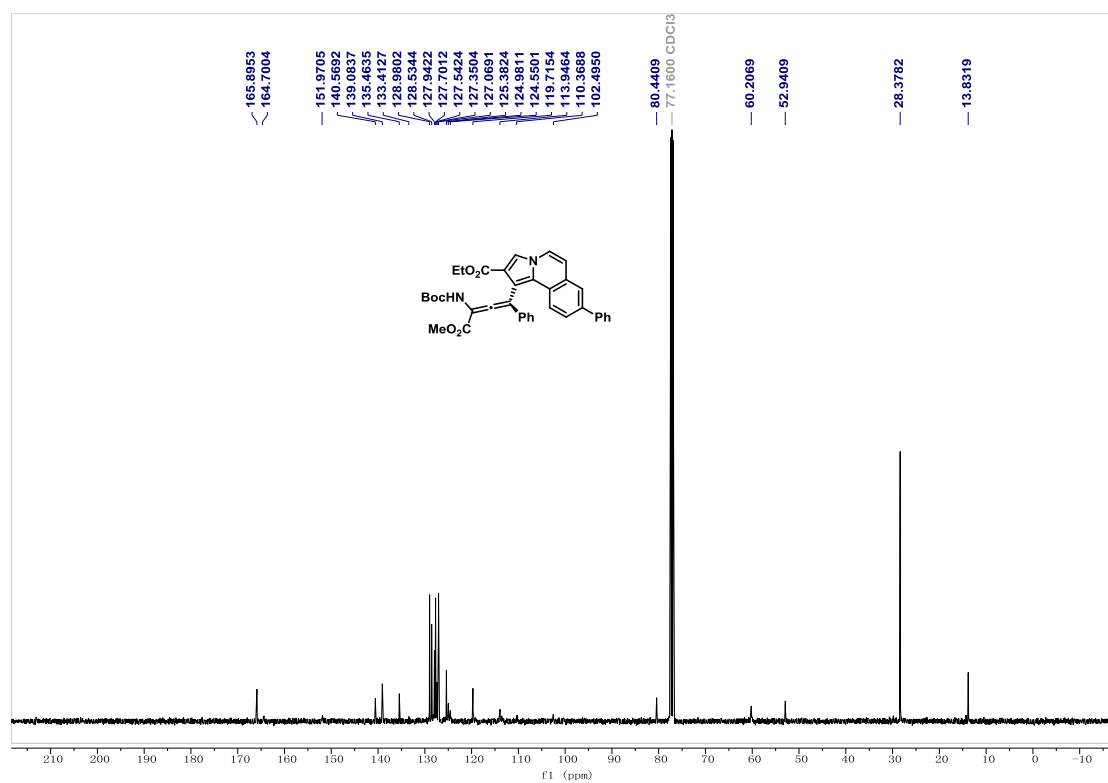

### HPLC analysis: rac-3v

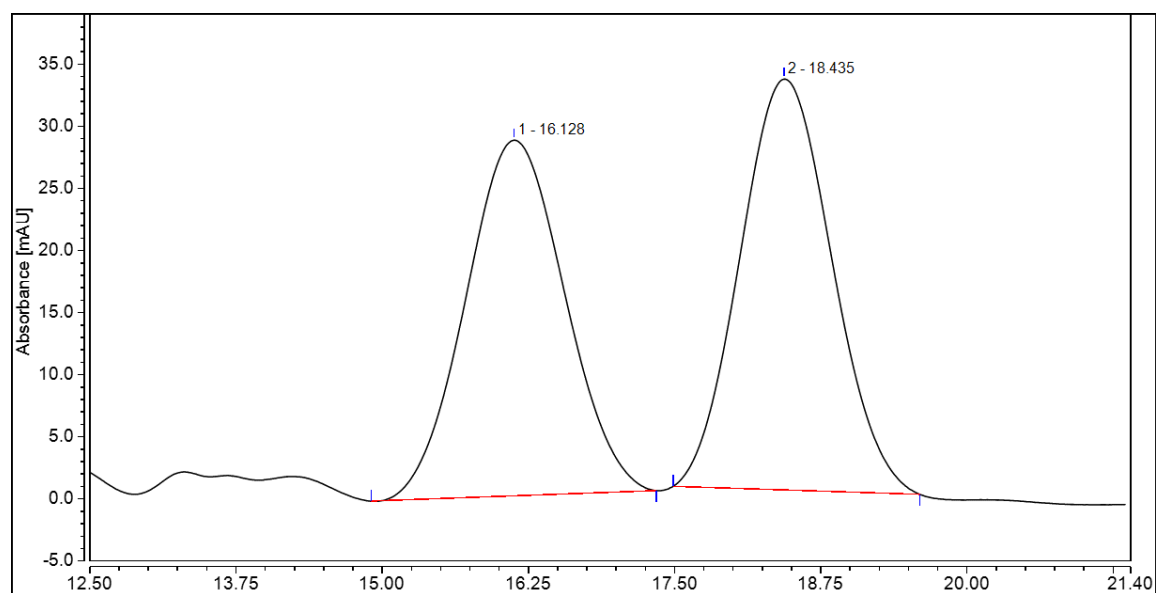

| Peak | RetTime<br>min | Area<br>mAU*min | Height<br>mAU | Area<br>% | Height<br>% |
|------|----------------|-----------------|---------------|-----------|-------------|
| 1    | 16.128         | 27.991          | 28.642        | 48.21     | 46.39       |
| 2    | 18.435         | 30.075          | 33.094        | 51.79     | 53.61       |

### Enantioenriched 3v

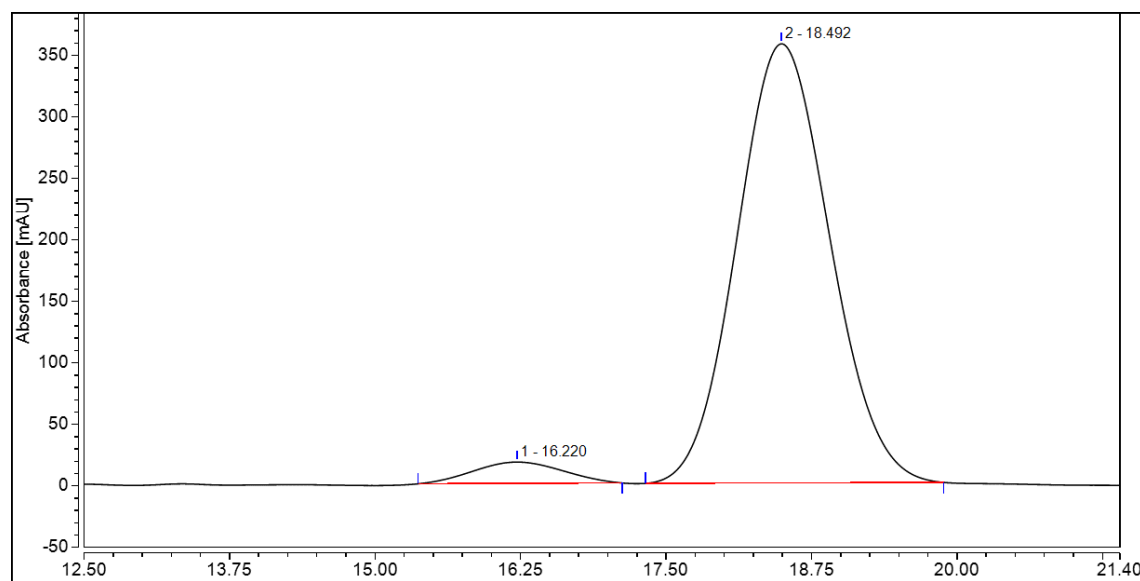

| Peak | RetTime<br>min | Area<br>mAU*min | Height<br>mAU | Area<br>% | Height<br>% |
|------|----------------|-----------------|---------------|-----------|-------------|
| 1    | 16.220         | 15.409          | 17.347        | 4.45      | 4.63        |
| 2    | 18.492         | 330.757         | 357.104       | 95.55     | 95.37       |

<sup>1</sup>H NMR of **3w** (500 MHz, Acetone-*d*<sub>6</sub>)

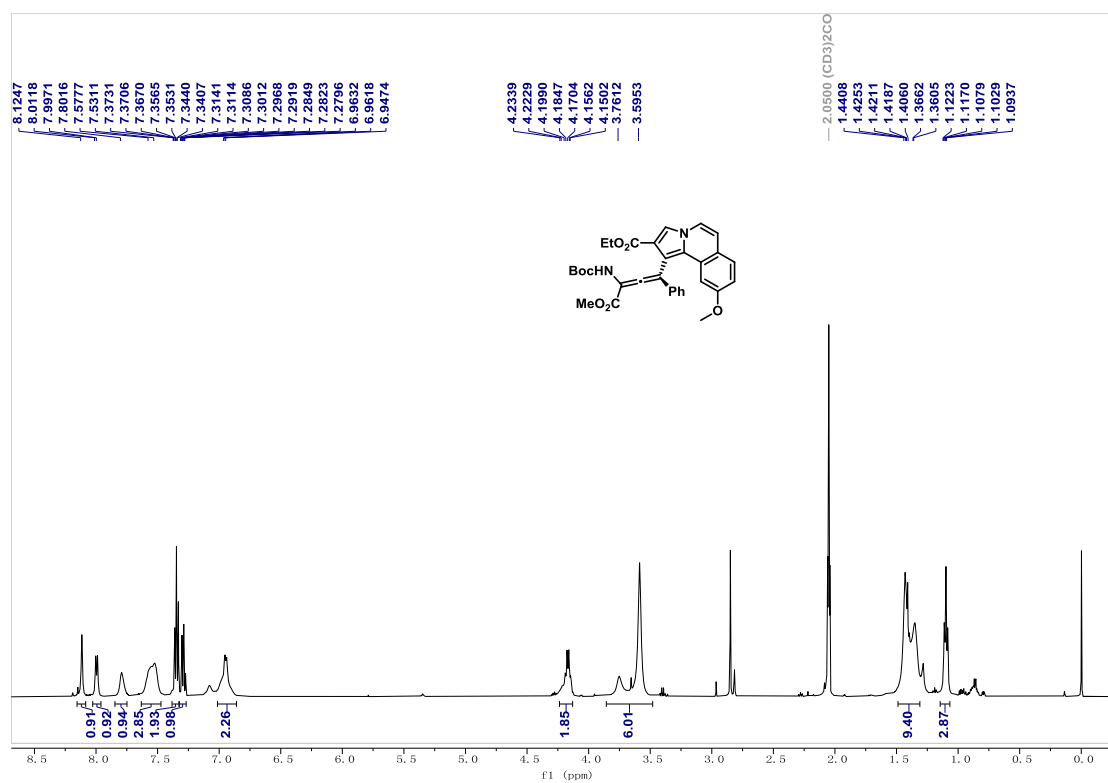

<sup>13</sup>C NMR of **3w** (126 MHz, Acetone-*d*<sub>6</sub>)

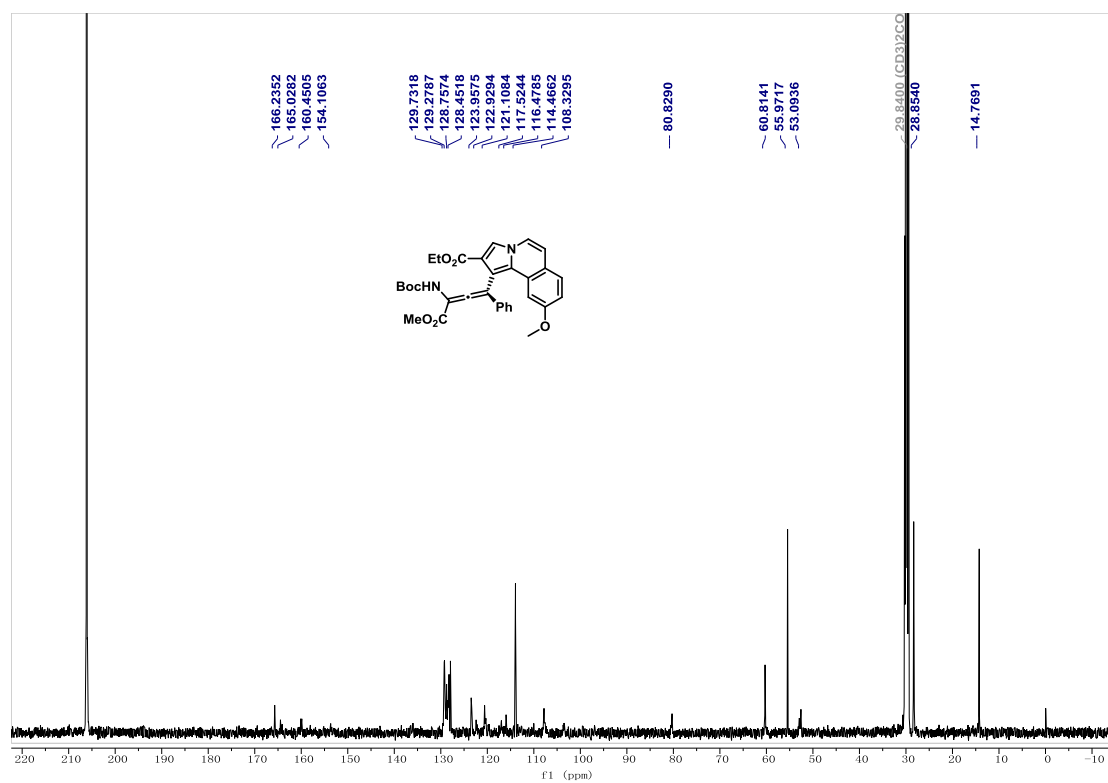

### HPLC analysis: rac-3w

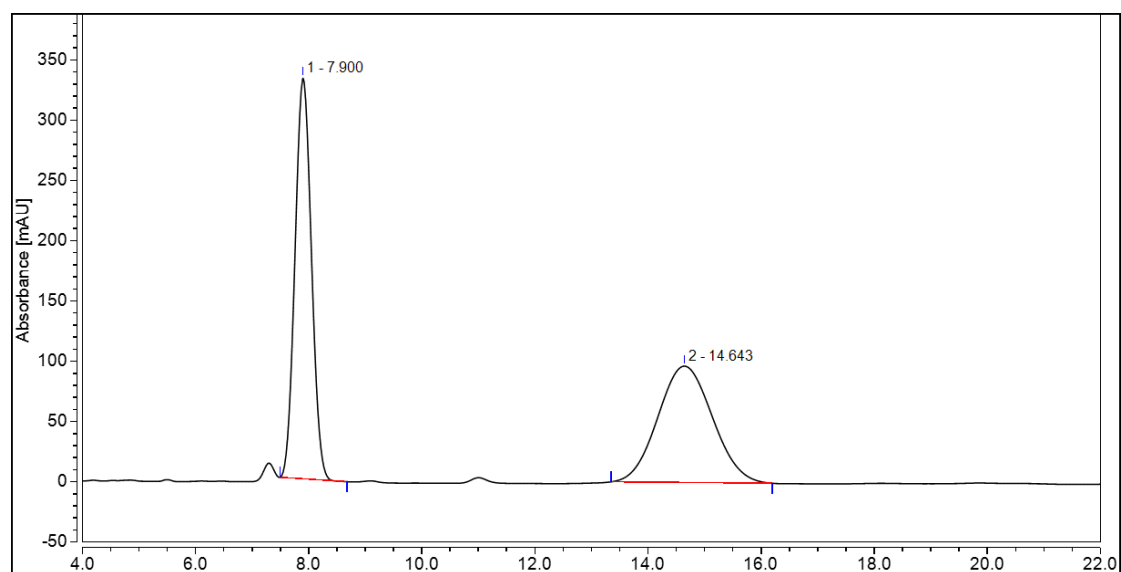

| Peak | RetTime<br>min | Area<br>mAU*min | Height<br>mAU | Area<br>% | Height<br>% |
|------|----------------|-----------------|---------------|-----------|-------------|
| 1    | 7.900          | 111.767         | 332.362       | 50.92     | 77.49       |
| 2    | 14.643         | 107.726         | 96.532        | 49.08     | 22.51       |

### Enantioenriched 3w

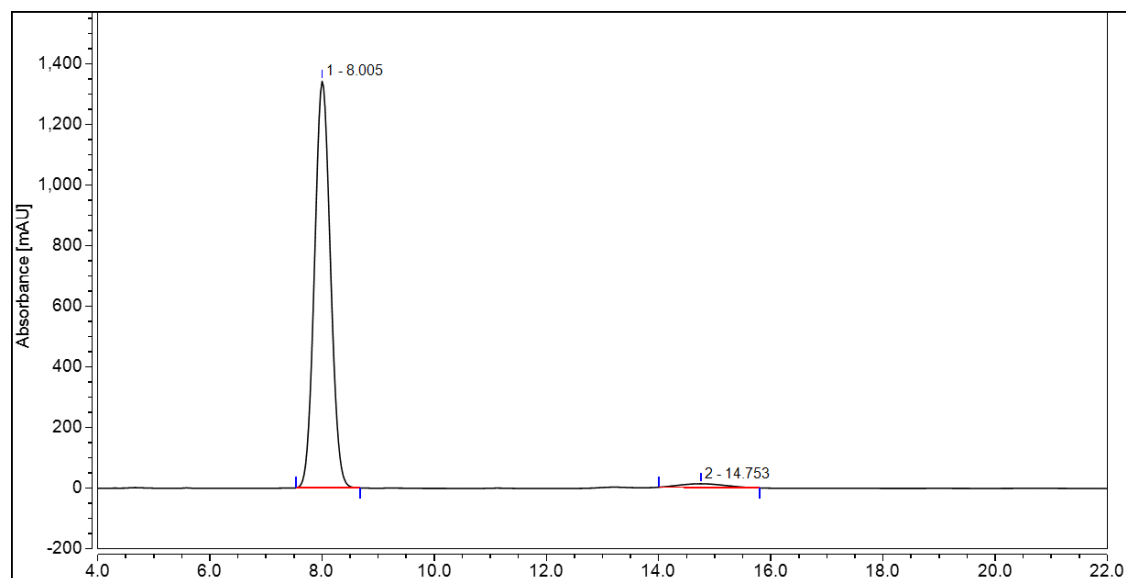

| Peak | RetTime<br>min | Area<br>mAU*min | Height<br>mAU | Area<br>% | Height<br>% |
|------|----------------|-----------------|---------------|-----------|-------------|
| 1    | 8.005          | 441.301         | 1342.270      | 97.44     | 99.09       |
| 2    | 14.753         | 11.612          | 12.294        | 2.56      | 0.91        |

<sup>1</sup>H NMR of **3x** (400 MHz, CDCl<sub>3</sub>)

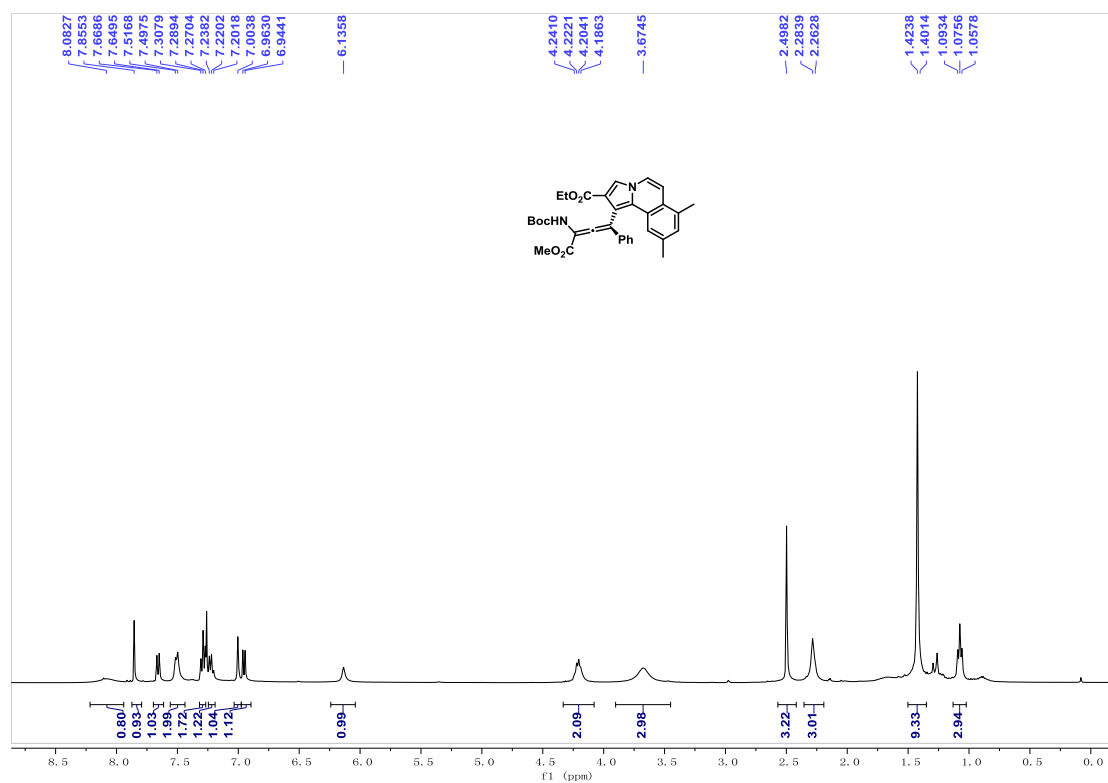

<sup>13</sup>C NMR of **3x** (101 MHz, CDCl<sub>3</sub>)

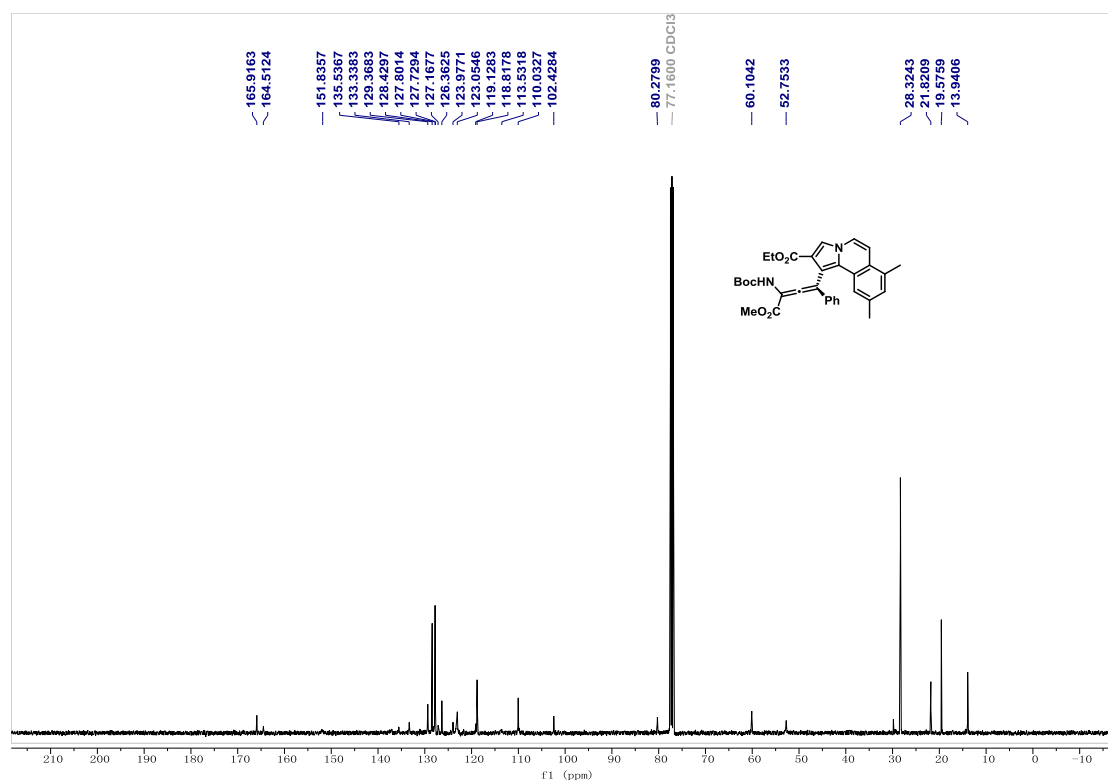

### HPLC analysis: rac-3x

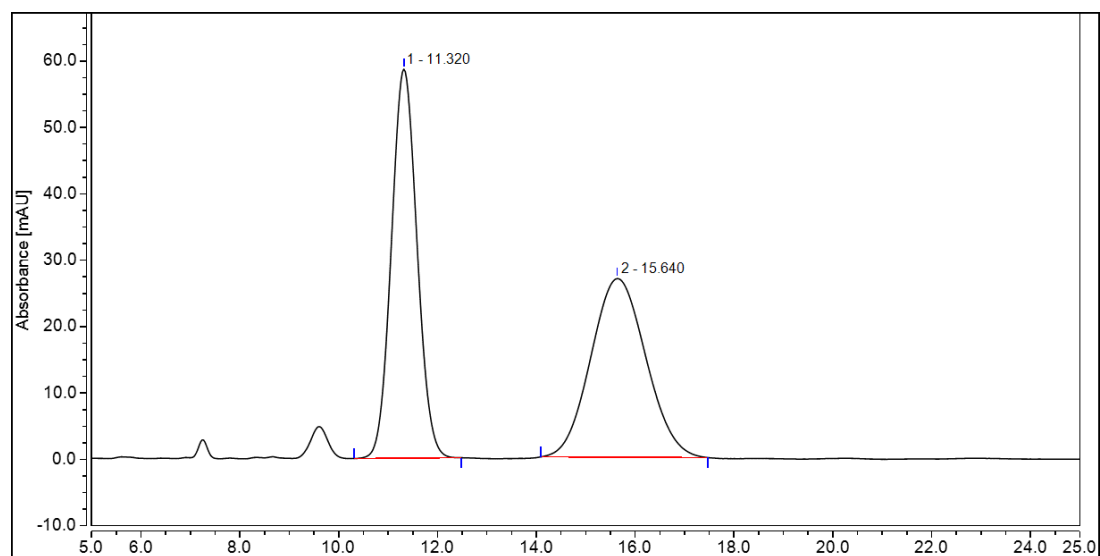

| Peak | RetTime<br>min | Area<br>mAU*min | Height<br>mAU | Area<br>% | Height<br>% |
|------|----------------|-----------------|---------------|-----------|-------------|
| 1    | 11.320         | 35.239          | 58.619        | 50.39     | 68.53       |
| 2    | 15.640         | 34.696          | 26.913        | 49.61     | 31.47       |

### Enantioenriched 3x

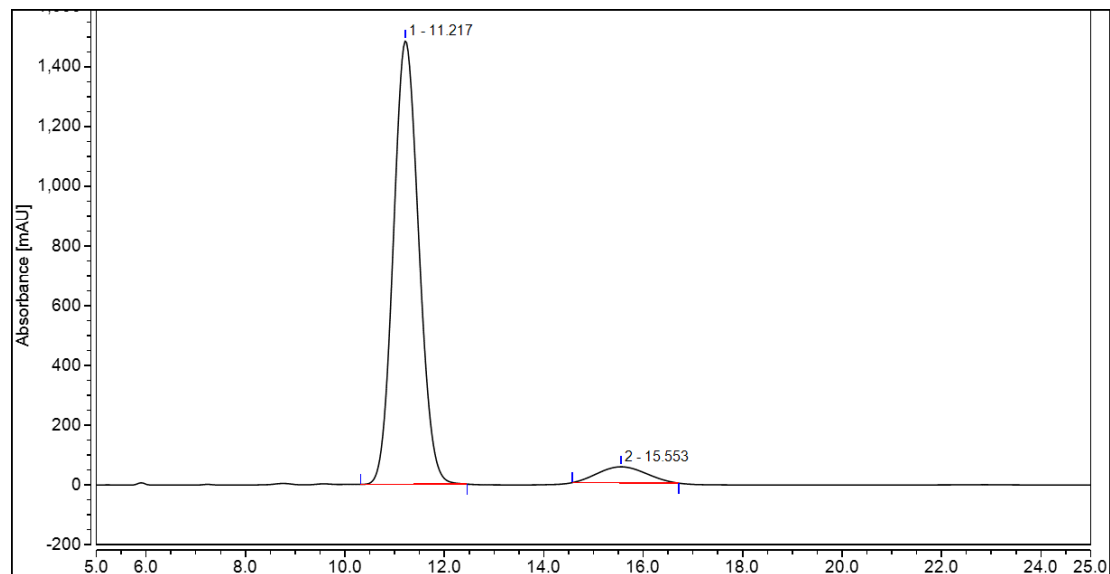

| Peak | RetTime<br>min | Area<br>mAU*min | Height<br>mAU | Area<br>% | Height<br>% |
|------|----------------|-----------------|---------------|-----------|-------------|
| 1    | 11.217         | 876.364         | 1484.678      | 93.58     | 96.51       |
| 2    | 15.553         | 60.077          | 53.686        | 6.42      | 3.49        |

<sup>1</sup>H NMR of **3y** (400 MHz, CDCl<sub>3</sub>)

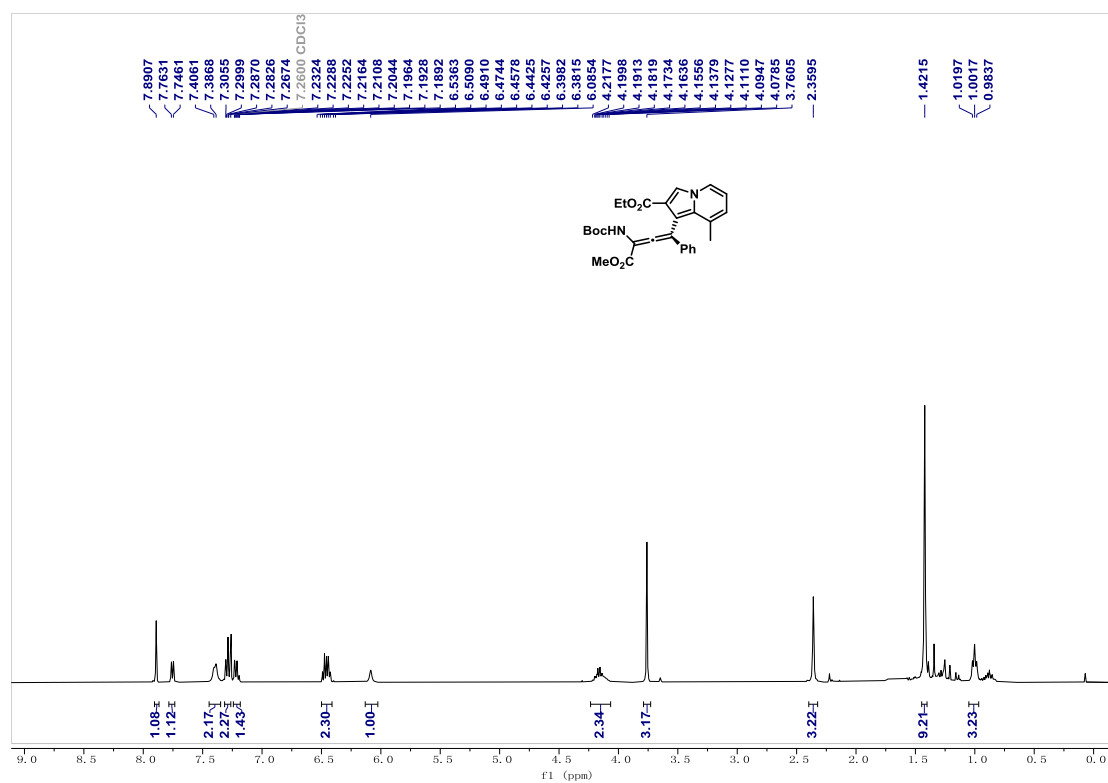

<sup>13</sup>C NMR of **3y** (101 MHz, CDCl<sub>3</sub>)

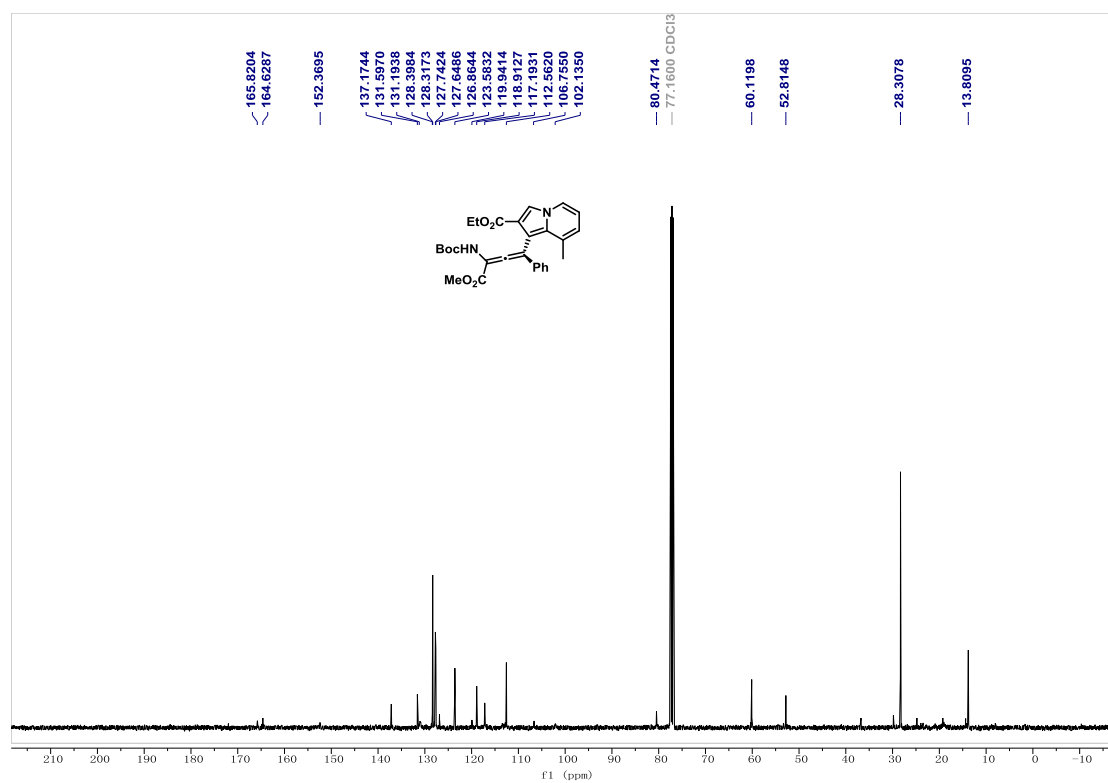

### HPLC analysis: rac-3y

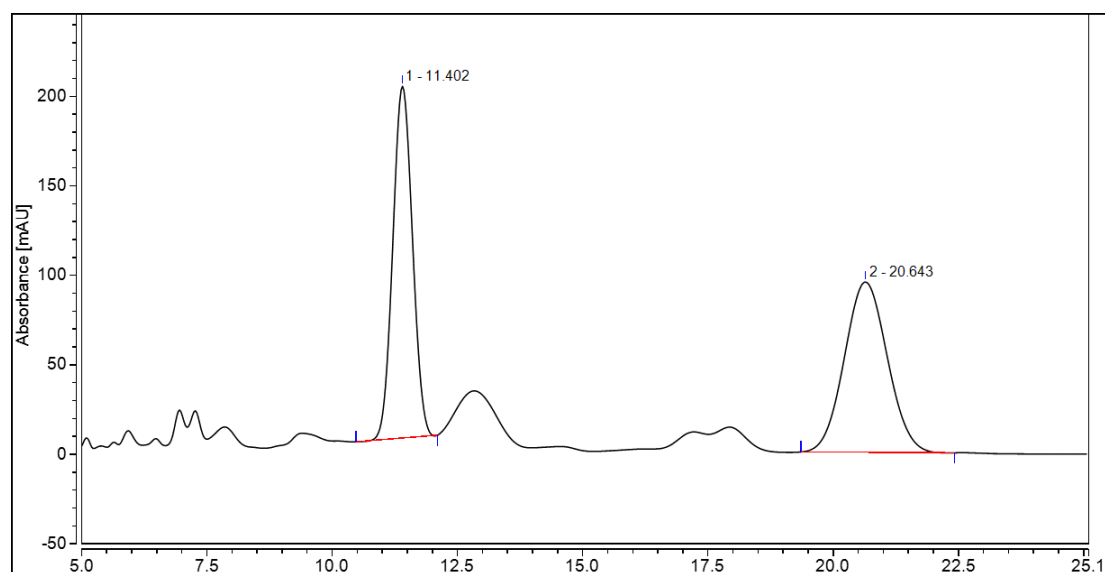

| Peak | RetTime<br>min | Area<br>mAU*min | Height<br>mAU | Area<br>% | Height<br>% |
|------|----------------|-----------------|---------------|-----------|-------------|
| 1    | 11.402         | 89.319          | 196.566       | 48.59     | 67.39       |
| 2    | 20.643         | 94.520          | 95.136        | 51.41     | 32.61       |

### Enantioenriched 3y

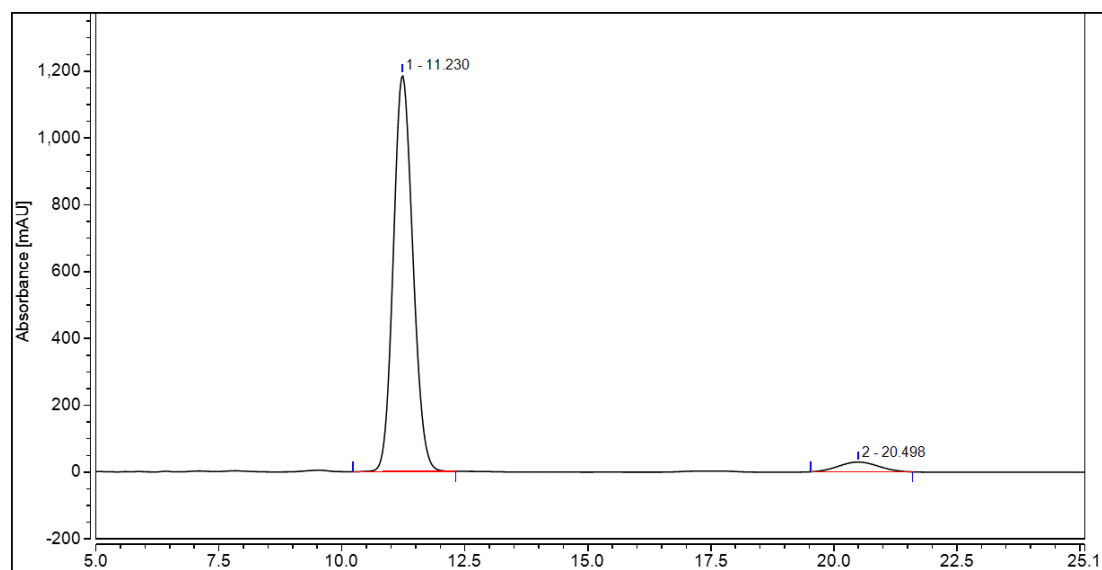

| Peak | RetTime<br>min | Area<br>mAU*min | Height<br>mAU | Area<br>% | Height<br>% |
|------|----------------|-----------------|---------------|-----------|-------------|
| 1    | 11.230         | 545.289         | 1186.512      | 95.19     | 97.59       |
| 2    | 20.498         | 27.582          | 29.285        | 4.81      | 2.41        |

$^1\text{H}$  NMR of **4a** (400 MHz,  $\text{CDCl}_3$ )

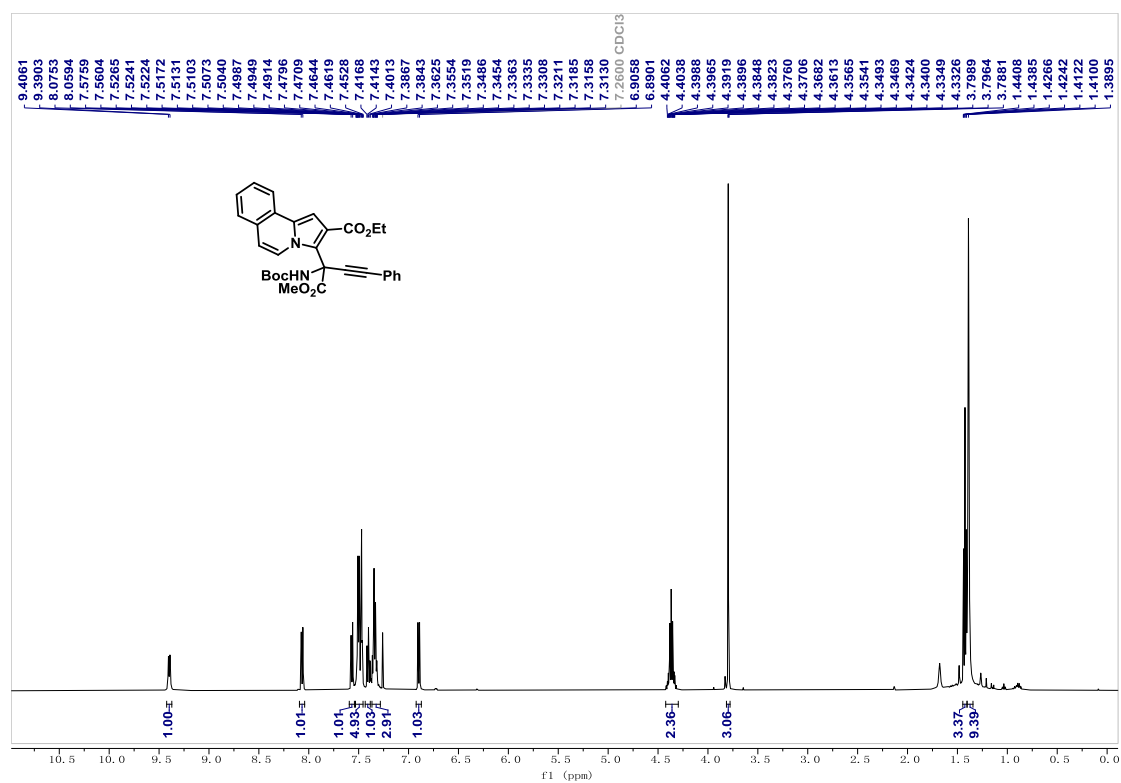

$^{13}\text{C}$  NMR of **4a** (101 MHz,  $\text{CDCl}_3$ )

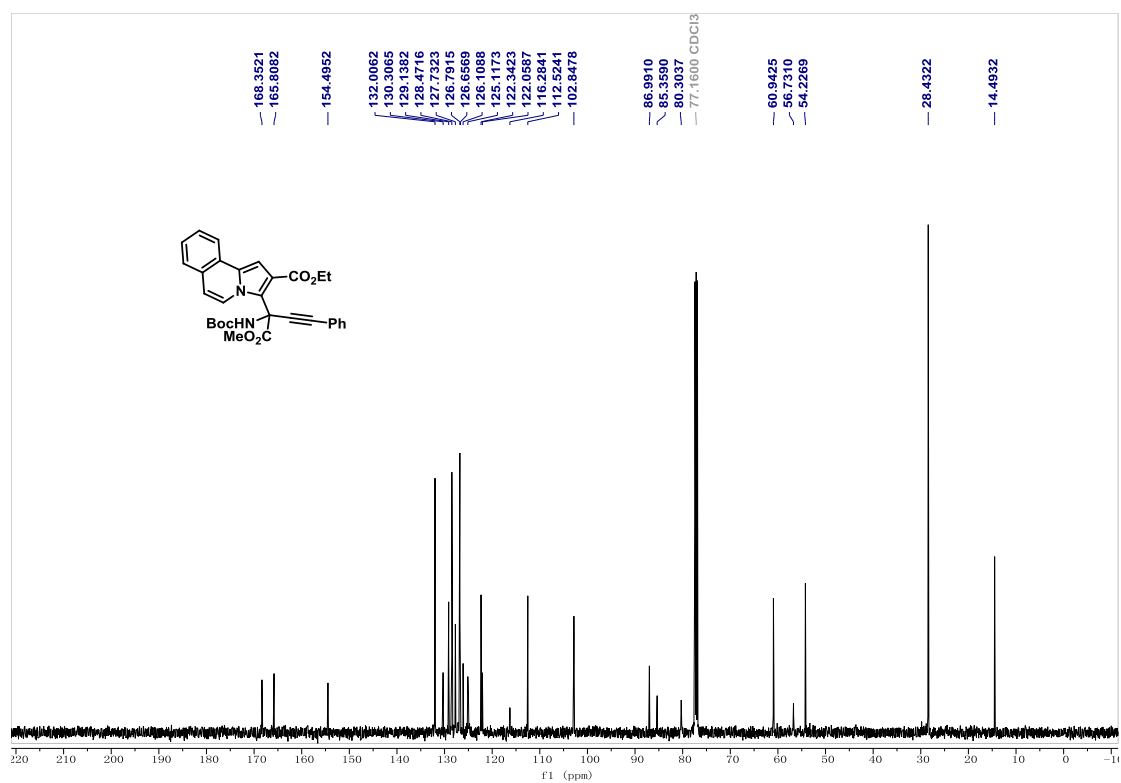

$^1\text{H}$  NMR of **5** (400 MHz,  $\text{CDCl}_3$ )

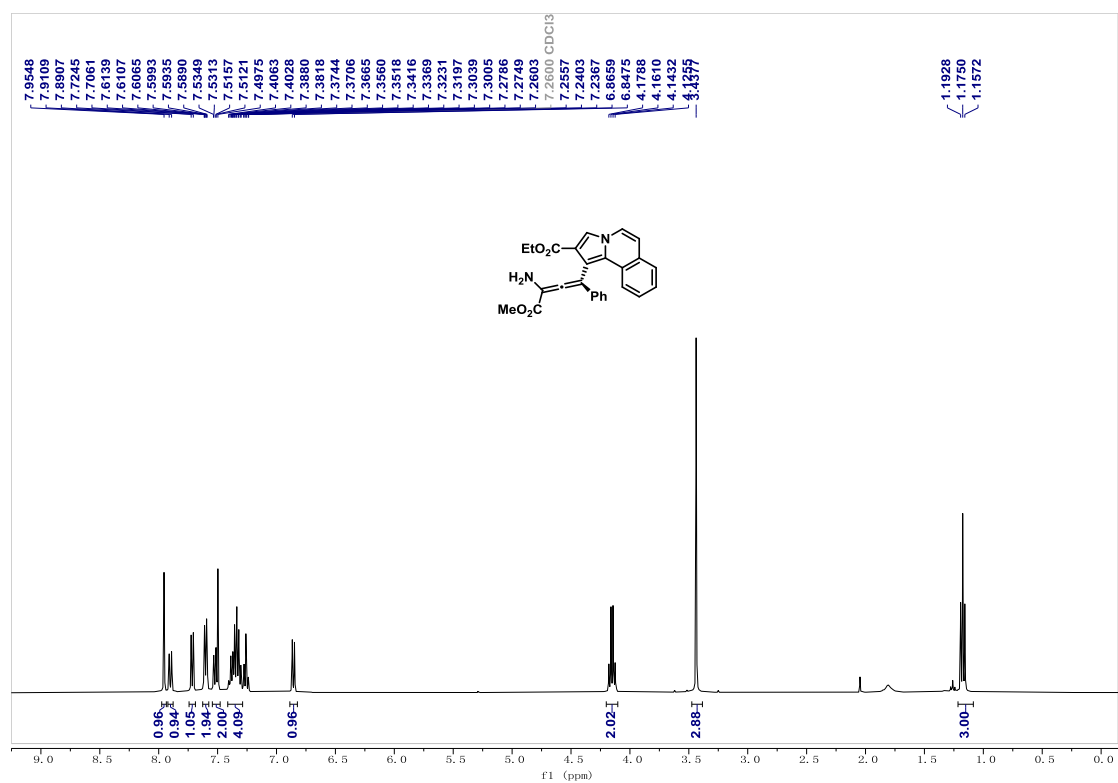

$^{13}\text{C}$  NMR of **5** (101 MHz,  $\text{CDCl}_3$ )

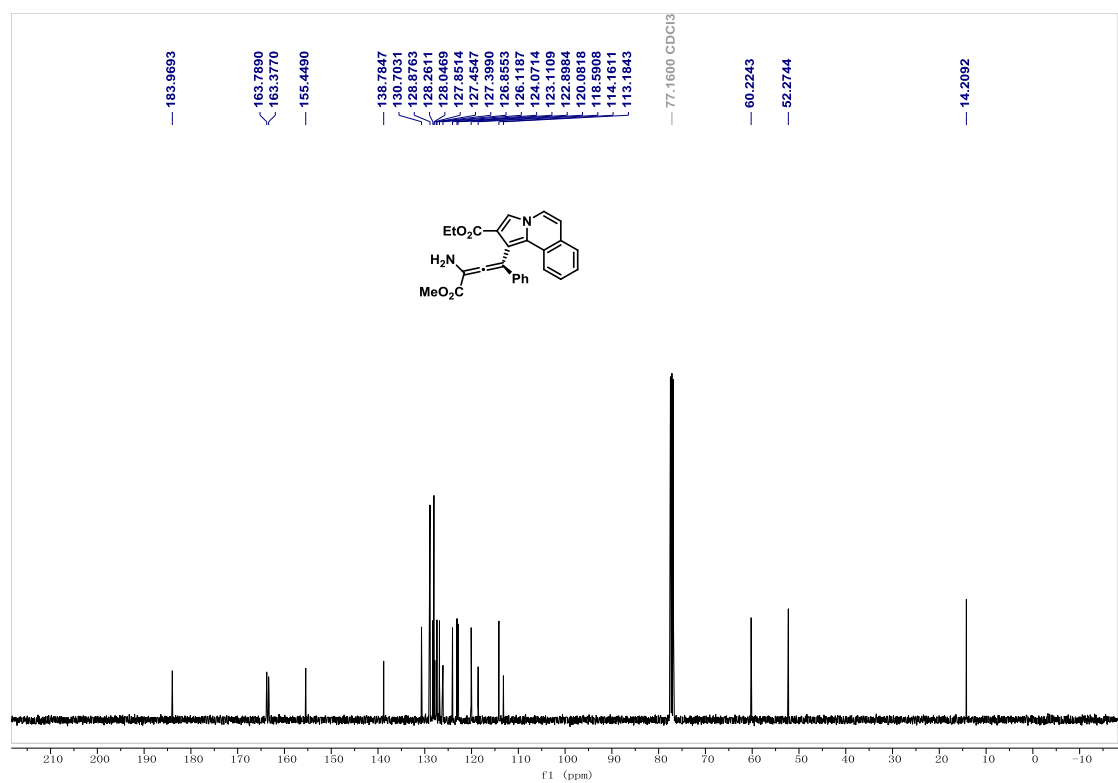

### HPLC analysis: rac-5

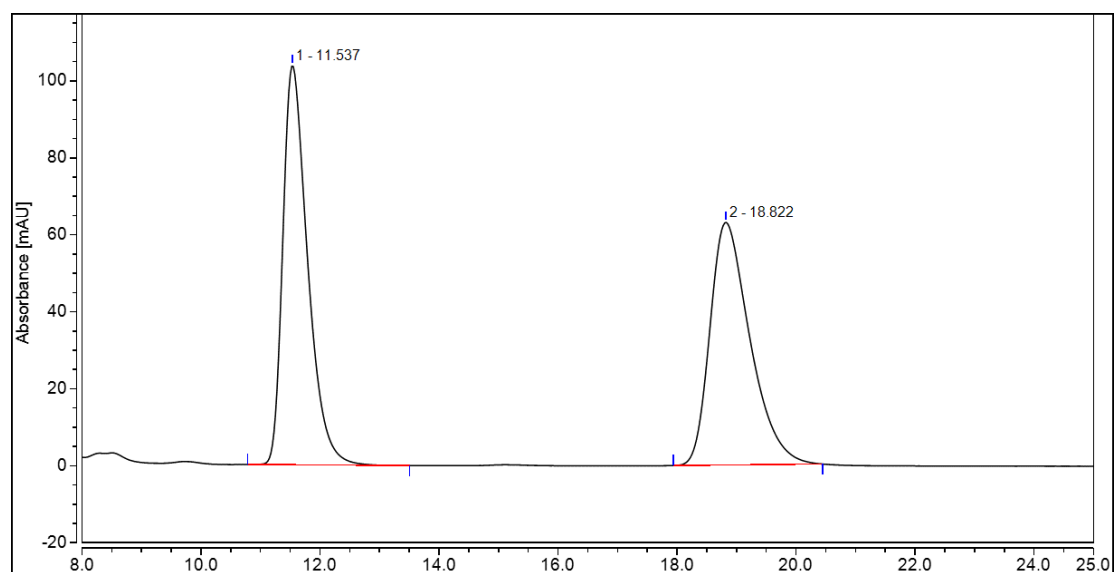

| Peak | RetTime<br>min | Area<br>mAU*min | Height<br>mAU | Area<br>% | Height<br>% |
|------|----------------|-----------------|---------------|-----------|-------------|
| 1    | 11.537         | 50.018          | 103.818       | 50.45     | 62.21       |
| 2    | 18.822         | 49.123          | 63.066        | 49.55     | 37.79       |

### Enantioenriched 5

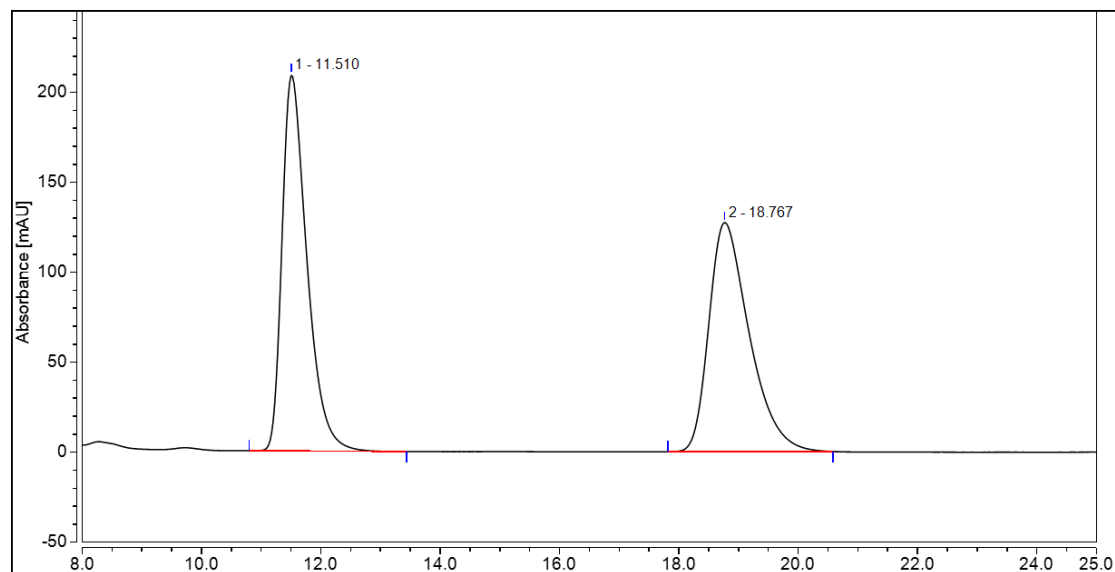

| Peak | RetTime<br>min | Area<br>mAU*min | Height<br>mAU | Area<br>% | Height<br>% |
|------|----------------|-----------------|---------------|-----------|-------------|
| 1    | 11.510         | 100.701         | 208.946       | 50.28     | 62.13       |
| 2    | 18.767         | 99.587          | 127.340       | 49.72     | 37.87       |

<sup>1</sup>H NMR of **6** (500 MHz, Acetone-d<sub>6</sub>)

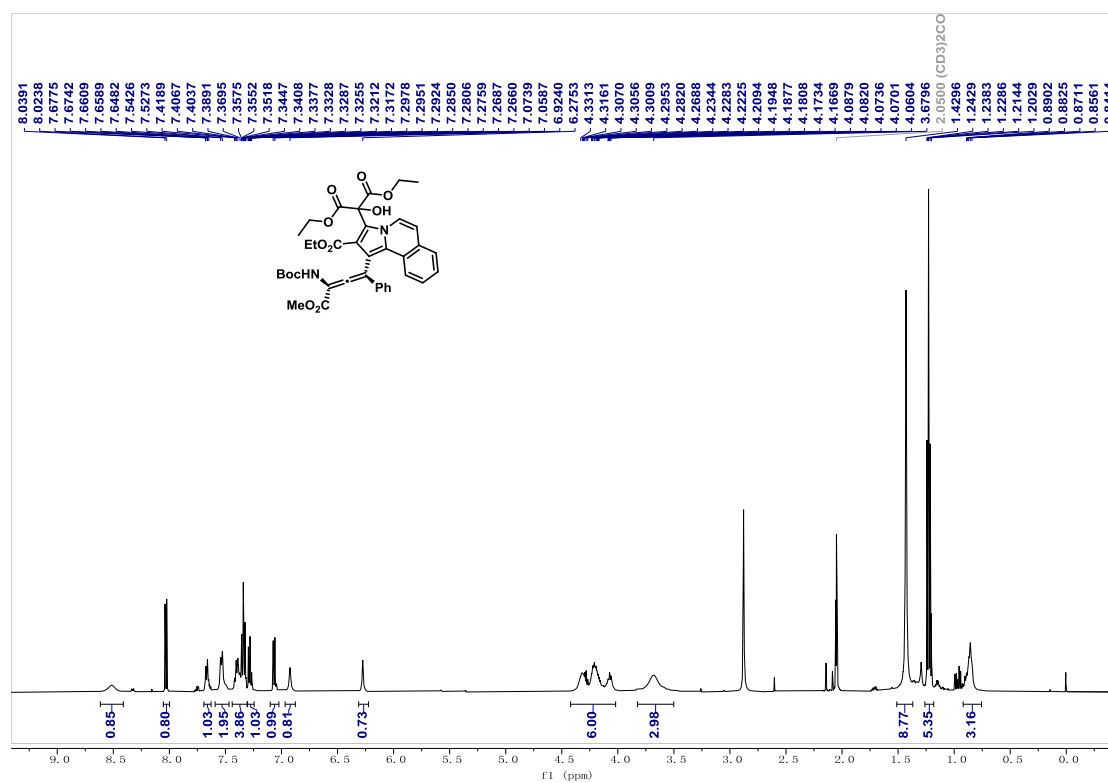

<sup>13</sup>C NMR of **6** (126 MHz, Acetone-d<sub>6</sub>)

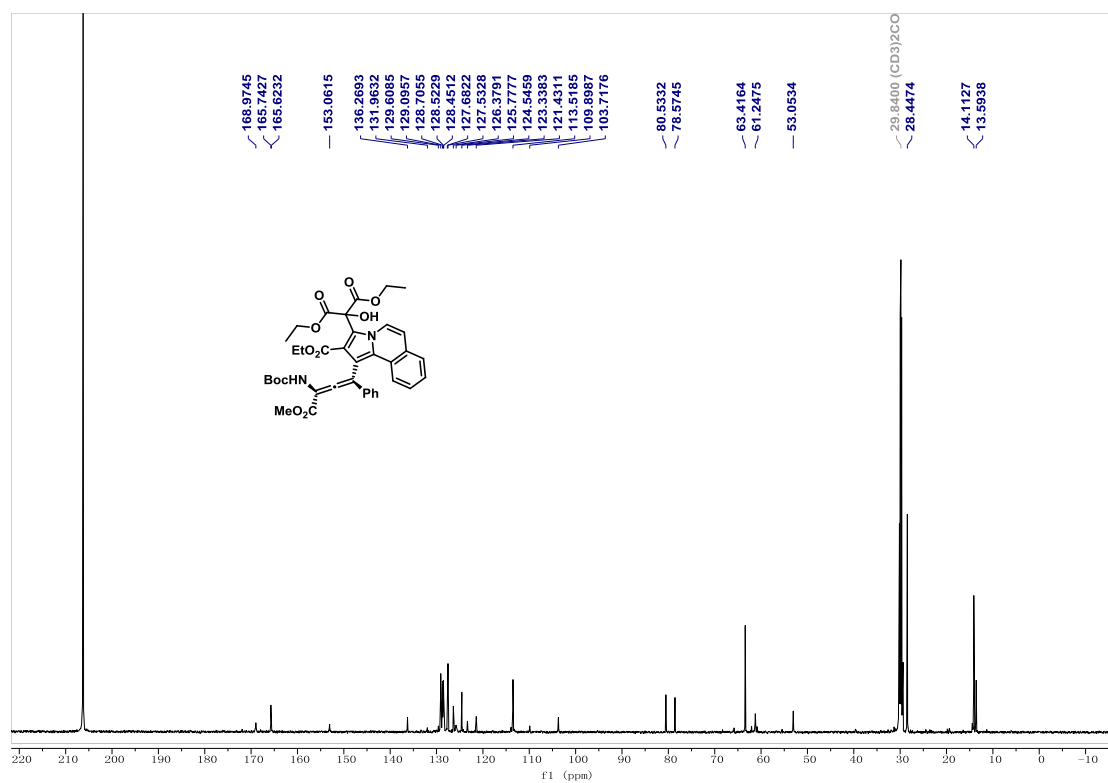

# HPLC analysis: rac-6

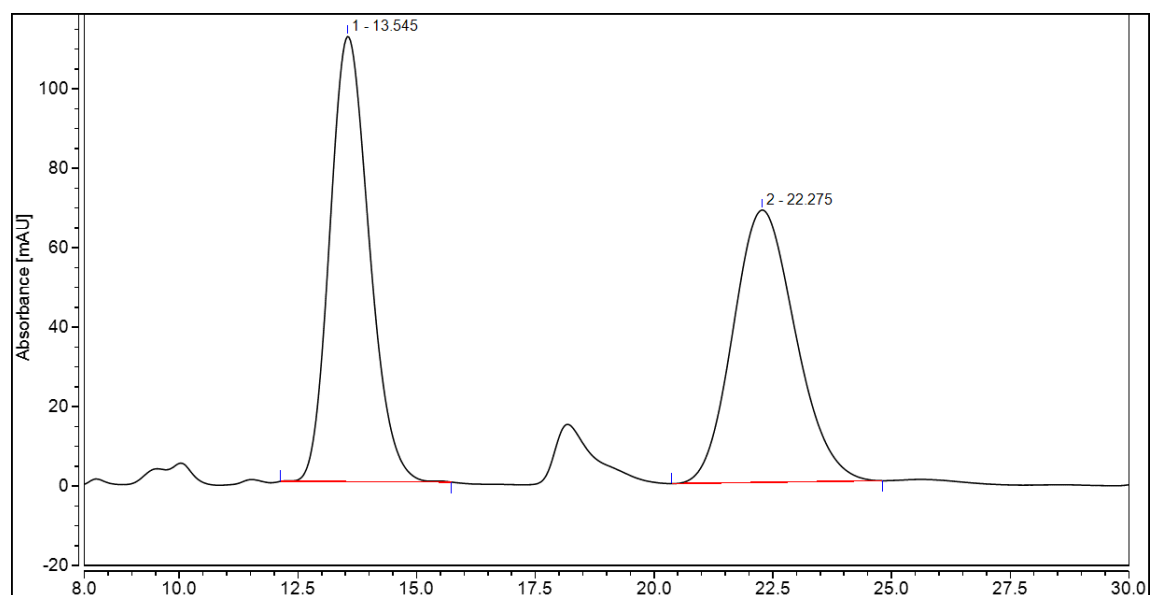

| Peak | RetTime<br>min | Area<br>mAU*min | Height<br>mAU | Area<br>% | Height<br>% |
|------|----------------|-----------------|---------------|-----------|-------------|
| 1    | 13.545         | 107.881         | 112.103       | 50.77     | 62.05       |
| 2    | 22.275         | 104.611         | 68.577        | 49.23     | 37.95       |

## Enantioenriched 6

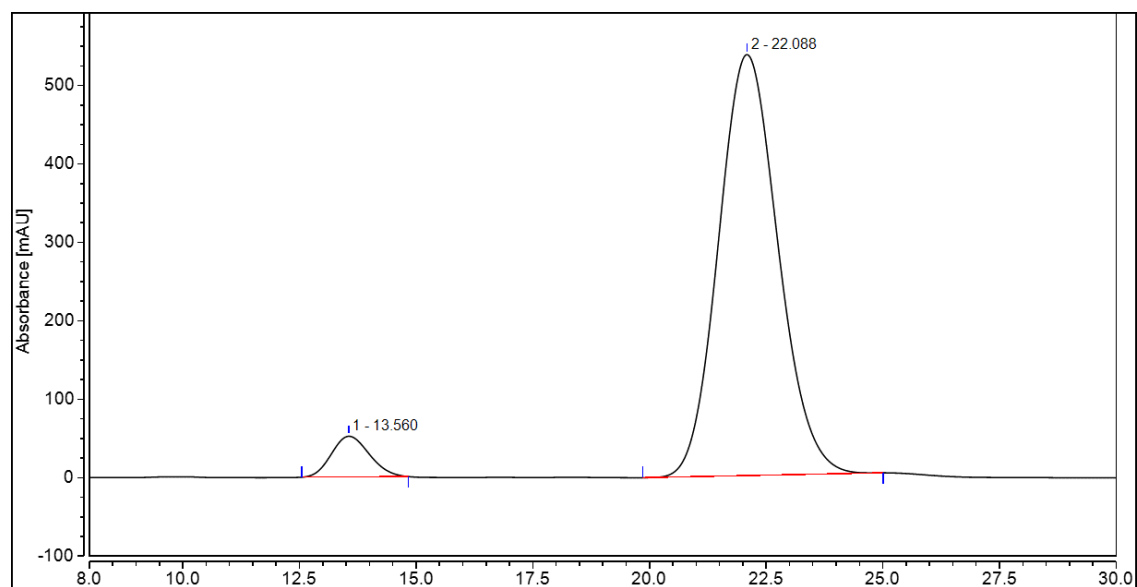

| Peak | RetTime<br>min | Area<br>mAU*min | Height<br>mAU | Area<br>% | Height<br>% |
|------|----------------|-----------------|---------------|-----------|-------------|
| 1    | 13.560         | 48.811          | 51.884        | 5.80      | 8.81        |
| 2    | 22.088         | 793.170         | 536.914       | 94.20     | 91.19       |

## 12. Reference

- (1) J. Yang, Z. Wang, Z. He, G. Li, L. Hong, W. Sun, R. Wang, *Angew. Chem., Int. Ed.* 2020, **59**, 642-647.
- (2) Y.-M. Zhang, M.-L. Yuan, W.-P. Liu, J.-H. Xie and Q.-L. Zhou, *Org. Lett.*, 2018, **20**, 4486-4489.
- (3) E. A. Trifonova, A. A. Komarova, D. Chusov, D. S. Perekalin, *Synlett* 2020, **31**, 1117-1120.
- (4) S.-W. Liu, Y.-J. Gao, Y. Shi, L. Zhou, X. Tang, H.-L. Cui, *J. Org. Chem.* 2018, **83**, 13754-13764.
